# Supplementary material for: Visible-light-induced metal-free cascade cyclization of N-arylpropiolamides to 3-phosphorylated, trifluoromethylated and thiocyanated azaspiro[4.5]trienones
Source: Royal Society of Chemistry journal article supplement (doi:10.1039/d0qo01410a), 2020-12-21
Supplement: d0qo01410a1.pdf [file d0qo01410a1.pdf]

## Supporting Information

### Visible-Light-Induced Metal-Free Cascade Cyclization of *N*-arylpropiolamides to 3-Phosphorylated, Trifluoromethylated and Thiocyanated azaspiro[4.5]trienones

Fan-Lin Zeng,<sup>a</sup> Xiao-Lan Chen,<sup>a\*</sup> Kai Sun,<sup>a\*</sup> Hu-Lin Zhu,<sup>a</sup> Xiao-Ya Yuan,<sup>a</sup> Yan Liu,<sup>a,b</sup> Ling-Bo Qu,<sup>a</sup> Yu-Fen Zhao,<sup>a</sup> and Bing Yu<sup>a\*</sup>

<sup>a</sup> Green Catalysis Center, College of Chemistry, Zhengzhou University, Zhengzhou 450001, China. E-mail: chenxl@zzu.edu.cn, sunkaichem@zzu.edu.cn, bingyu@zzu.edu.cn

<sup>b</sup> College of Biological and Pharmaceutical Engineering, Xinyang Agriculture & Forestry University, Xinyang 464000, China

### Table of Contents

|                                                   |            |
|---------------------------------------------------|------------|
| <b>1. General Information.....</b>                | <b>S2</b>  |
| <b>2. Experimental Procedures.....</b>            | <b>S2</b>  |
| <b>3. Characterization Data for Products.....</b> | <b>S13</b> |
| <b>4. NMR Copies of Products.....</b>             | <b>S26</b> |
| <b>5. Reference.....</b>                          | <b>S73</b> |

## 1. General Information

### 1.1 Materials and instruments

All commercially available reagents were used directly without further purification. All reactions were monitored by Thin Layer Chromatography (TLC) using silica gel F254 plates. Products were purified by column chromatography using 200-300 mesh silica gel as the stationary phase. All the  $^1\text{H}$ ,  $^{13}\text{C}$ ,  $^{31}\text{P}$ , and  $^{19}\text{F}$  NMR spectra were recorded on Bruker Avance 400 or 600 spectrometers. All NMR spectra were recorded in  $\text{CDCl}_3$  at room temperature ( $20 \pm 2$  °C). Proton chemical shifts  $\delta$  were given in ppm using TMS as the internal standard. High-resolution mass spectra (HRMS) were obtained with a 3000-mass spectrometer, using Waters Q-ToF MS/MS system with the ESI technique. Emission intensities were recorded using an F-4600 FL spectrophotometer. Cyclic voltammetry was performed on the CHI-660E electrochemical workstation (Shanghai Chenhua Instrument Co., Ltd., China).

### 1.2 The spectrum of our lamp and the visible-light irradiation instrument.

All reactions have been studied in borosilicate glass vessels irradiated by blue light from a photoreactor manufactured by Beijing Roger Technology Co., Ltd. without using filters.

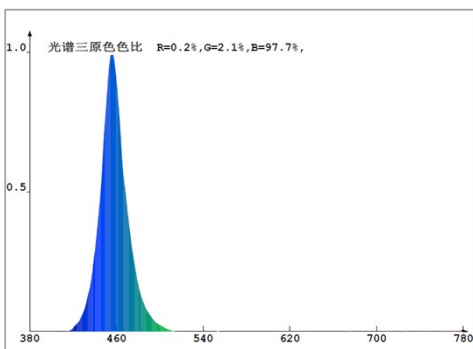

Figure S1a. The spectrum of our lamp (blue LED)

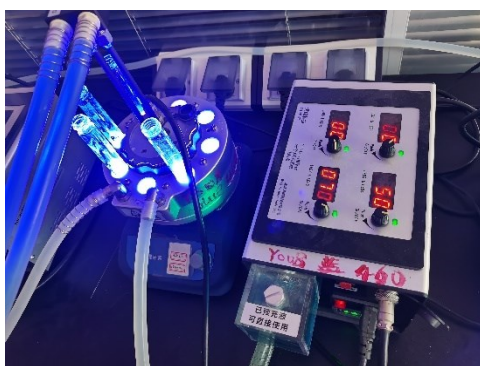

Figure S1b. The visible-light irradiation instrument

## 2. Experimental procedures

### 2.1 Optimization of reaction conditions

Table S1. Optimization of reaction conditions of **3a**

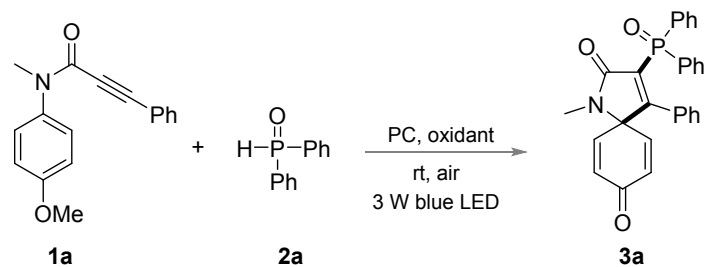

| Entry           | PC (mol%)                   | Solvent (v/v)                     | Oxidant (equiv)                                  | Yield (%) |
|-----------------|-----------------------------|-----------------------------------|--------------------------------------------------|-----------|
| 1               | 4CzIPN (5)                  | MeCN                              | LPO (2)                                          | 60        |
| 2               | 4CzIPN (5)                  | DMC                               | LPO (2)                                          | 40        |
| 3               | 4CzIPN (5)                  | H <sub>2</sub> O                  | LPO (2)                                          | 20        |
| 4               | 4CzIPN (5)                  | DMF                               | LPO (2)                                          | N.D.      |
| 5               | 4CzIPN (5)                  | DCE                               | LPO (2)                                          | N.D.      |
| 6               | 4CzIPN (5)                  | DMSO                              | LPO (2)                                          | N.D.      |
| 7               | 4CzIPN (5)                  | MeCN/H <sub>2</sub> O (100:1)     | LPO (2)                                          | 50        |
| 8               | 4CzIPN (5)                  | MeCN/H <sub>2</sub> O (50:1)      | LPO (2)                                          | 55        |
| 9               | 4CzIPN (5)                  | MeCN/H <sub>2</sub> O (30:1)      | LPO (2)                                          | 70        |
| 10              | <b>4CzIPN (5)</b>           | <b>MeCN/H<sub>2</sub>O (20:1)</b> | <b>LPO (2)</b>                                   | <b>83</b> |
| 11              | 4CzIPN (5)                  | MeCN/H <sub>2</sub> O (15:1)      | LPO (2)                                          | 60        |
| 12              | Na <sub>2</sub> Eosin Y (5) | MeCN/H <sub>2</sub> O (20:1)      | LPO (2)                                          | 15        |
| 13              | Rose Bengal (5)             | MeCN/H <sub>2</sub> O (20:1)      | LPO (2)                                          | trace     |
| 14              | Eosin B (5)                 | MeCN/H <sub>2</sub> O (20:1)      | LPO (2)                                          | 20        |
| 15              | Eosin Y (5)                 | MeCN/H <sub>2</sub> O (20:1)      | LPO (2)                                          | 15        |
| 16              | 4CzIPN (5)                  | MeCN/H <sub>2</sub> O (20:1)      | K <sub>2</sub> S <sub>2</sub> O <sub>8</sub> (2) | 25        |
| 17              | 4CzIPN (5)                  | MeCN/H <sub>2</sub> O (20:1)      | H <sub>2</sub> O <sub>2</sub> (2)                | trace     |
| 18              | 4CzIPN (5)                  | MeCN/H <sub>2</sub> O (20:1)      | TBHP (2)                                         | trace     |
| 19              | 4CzIPN (5)                  | MeCN/H <sub>2</sub> O (20:1)      | BPO (2)                                          | 30        |
| 20              | 4CzIPN (5)                  | MeCN/H <sub>2</sub> O (20:1)      | DDQ (2)                                          | trace     |
| 21              | 4CzIPN (5)                  | MeCN/H <sub>2</sub> O (20:1)      | TBPB (2)                                         | trace     |
| 22 <sup>b</sup> | 4CzIPN (5)                  | MeCN/H <sub>2</sub> O (20:1)      | LPO (2)                                          | N.D.      |
| 23              | --                          | MeCN/H <sub>2</sub> O (20:1)      | LPO (2)                                          | N.D.      |

<sup>a</sup> Reaction conditions: **1a** (0.2 mmol), **2a** (0.4 mmol), solvent (2 mL) under air for 3 h, room temperature, blue LED (3 W), PC = photocatalyst, N.D. = not detected, DMC = dimethyl carbonate. Yields were determined by <sup>1</sup>H NMR using 1,1,2,2-tetrachloroethane as the internal standard. <sup>b</sup> In dark.

We started with establishing a suitable reaction condition for accessing 3-phosphorylazaspiro[4.5]trienone using the model reaction of *N*-arylpropiolamide **1a** with diphenylphosphine oxide (**2a**) in the presence of different photocatalysts and oxidants under irradiation of blue LED at room temperature in open air, as summarized in Table S1. The influence of a variety of solvents on the model reaction was first examined (entries 1-11). Among them, the

target product **3a** was obtained in the highest yield of (83%) in a mixed solvent (MeCN-H<sub>2</sub>O, v/v: 20/1) (entry 10). Encouraged by this satisfied result, some other dyes as the photocatalysts (Na<sub>2</sub>EosinY, Rose Bengal, Eosin B, and Eosin Y) were further examined (entries 12-15). However, in sharp contrast, much less yields were observed with them. Among them, the highest yield was produced by using Eosin B and only up to 20% (entry 14). After that, some other usually used oxidants including K<sub>2</sub>S<sub>2</sub>O<sub>8</sub>, H<sub>2</sub>O<sub>2</sub>, tert-Butyl hydroperoxide (TBHP), benzoyl peroxide (BPO), 2,3-dichloro-5,6-dicyano-1,4-benzoquinone (DDQ), and tert-butyl peroxybenzoate (TBPB) on the model reaction were tried (entries 16-21). No any satisfied yields were observed in those cases, among which, the highest yield was gained with BPO and was up to 30% (entry 19). At last, the model reaction was carried out in dark and no 4CzIPN, as predicted, no any product of **3a** was obtained (entry 22-23). After a wide exploration, the optimal conditions were finally established as follows: **1a** (0.2 mmol), **2a** (0.4 mmol), 4CzIPN (5 mol%), LPO (2 equiv), MeCN:H<sub>2</sub>O (2 mL:100 uL) in air atmosphere under the irradiation of 3 W blue LED at room temperature for 3 h.

## 2.2 Preparation of starting materials

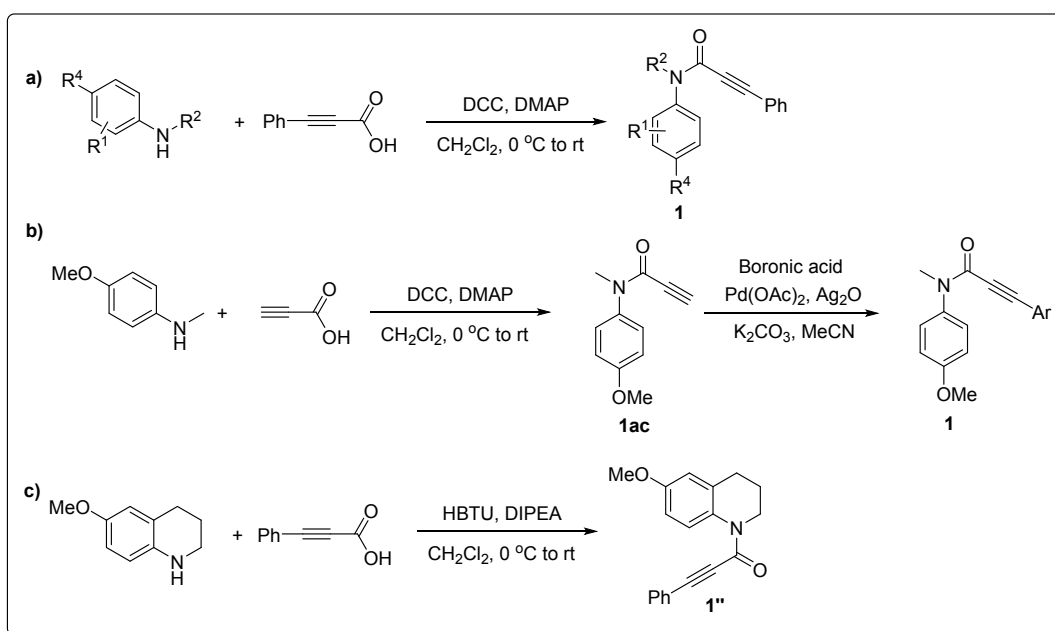

Scheme S1. General experimental procedures for substrates *N*-arylpropiolamides **1**

General procedure a): The mixture of *N*-methylaniline (or the relative aniline) (2.5 mmol, 1.0 equiv.) in CH<sub>2</sub>Cl<sub>2</sub> (15 mL) was added the corresponding propynoic acid (2.75 mmol, 1.1 equiv) at 0 °C, then a mixture of dicyclohexylcarbodiimide (DCC) (3.75 mmol, 1.5 equiv) and 4-dimethylaminopyridine (DMAP) (0.25 mmol, 0.1 equiv) in CH<sub>2</sub>Cl<sub>2</sub> (10 mL) was added dropwise, stirred at room temperature for 12 h. Then, the mixture was filtered and washed with CH<sub>2</sub>Cl<sub>2</sub> (3 x 50 mL) and concentrated. The residue was purified by a silica gel column chromatography (ether/ethyl acetate (v/v = 5/1)) to give the products (**1a-j**).<sup>1, 2, 5</sup>



acetate (v/v = 3/1) as eluting solvent to give the desired products **4**.

The mixture of *N*-arylpropiolamides **1** (0.2 mmol), NH<sub>4</sub>SCN (0.4 mmol), 4CzIPN (5 mol%) and MeCN (2.5 mL) were sequentially added in a 25 mL reaction vessel. Then the reaction vessel was exposed to 10 W blue LED irradiation at room temperature with stirring for 12 h (open air). After the reaction, the solvent was evaporated under vacuum, all the crude products were purified by silica gel chromatography using petroleum ether/ethyl acetate (v/v = 3/1) as eluting solvent to give the desired products **5**.

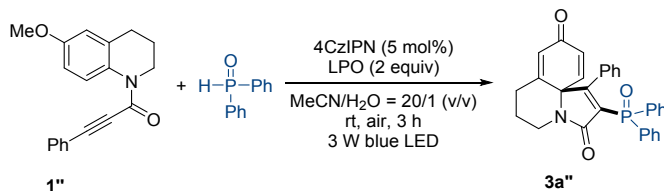

Scheme S3. General experimental procedures for the pyrrolo-[2,1-j]-quinolones

General procedure: The mixture of **1''** (0.2 mmol), diphenylphosphorus Oxide (0.4 mmol), 4CzIPN (5 mol%), LPO (2 equiv) and MeCN/H<sub>2</sub>O (2 mL/0.1 mL) were sequentially added in a 25 mL reaction vessel. Then the reaction vessel was exposed to 3 W blue LED irradiation at room temperature for 3 h (open-air). After the reaction was completed, the solvent was evaporated under vacuum, all the crude products were purified by thin-layer chromatography using petroleum ethyl acetate as eluting solvent to give the desired products **3a''**.

### 2.3 The gram-scale synthesis

The mixture of *N*-arylpropiolamides **1''** (0.2 mmol), Togni-II (0.4 mmol), 4CzIPN (5 mol%) and MeCN (2.5 mL) were sequentially added in a 25 mL reaction vessel. Then the reaction vessel was exposed to 10 W blue LED irradiation at room temperature with stirring for 12 h (open-air). After the reaction, the solvent was evaporated under vacuum, all the crude products were purified by silica gel chromatography using petroleum ether/ethyl acetate (v/v = 3/1) as eluting solvent to give the desired products **4a**.

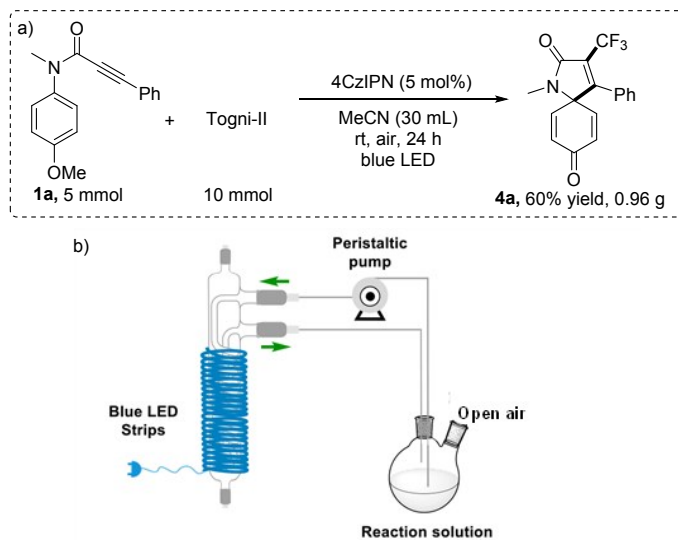

Scheme S4. Specially designed reactor for the gram-scale synthesis

Specially designed reactor for the gram-scale synthesis: Gram-scale synthesis of **4a** with blue LEDs light irradiation in air atmosphere: **1a** (5 mmol), Togni-II (10 mmol), 4CzIPN (5 mol%) in 30 mL MeCN at room temperature for 24 h with the assistance of specially designed reactor. An isolated yield of **4a** (60%, 0.96 g) was given.

## 2.4 HRMS data analysis

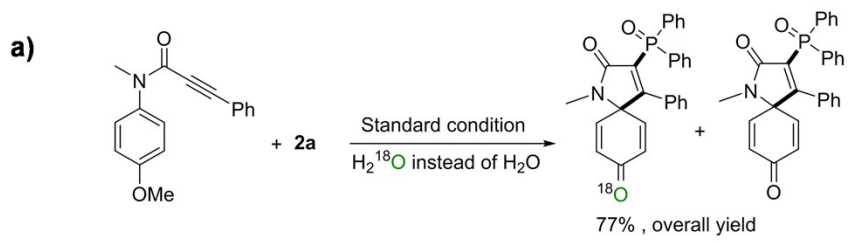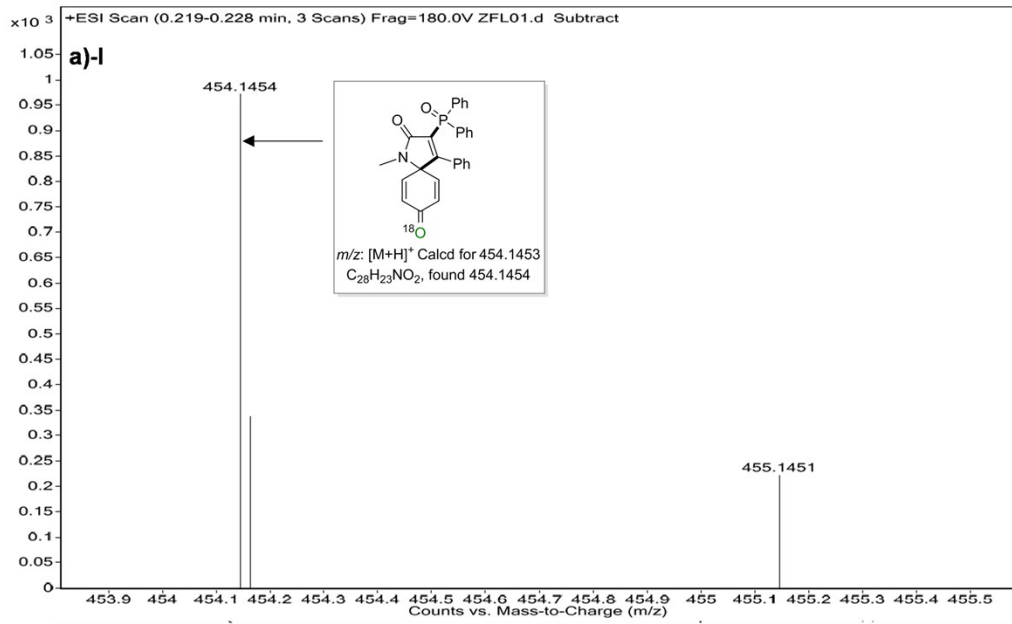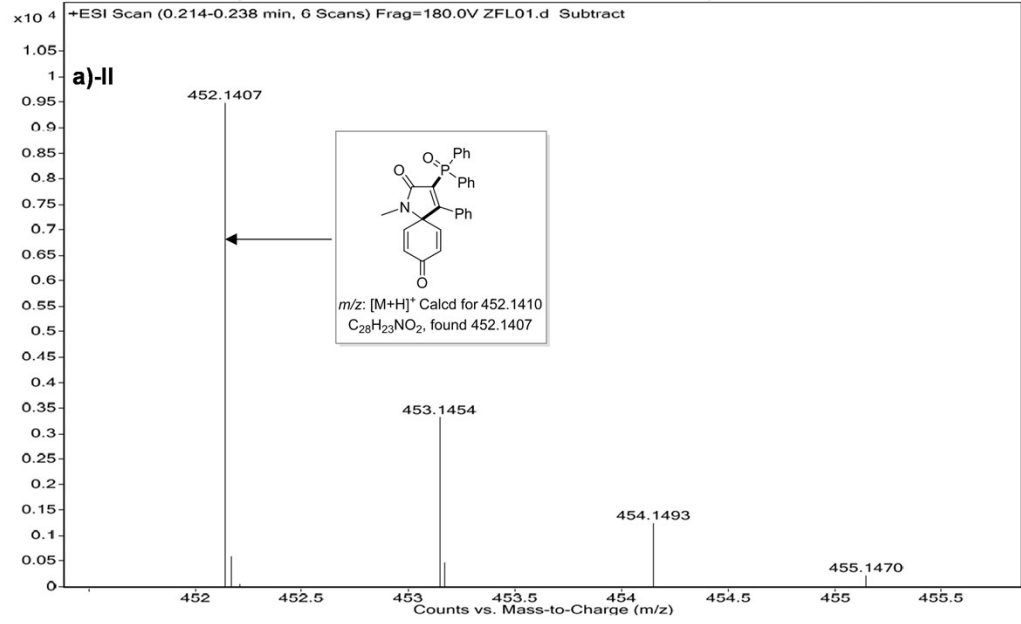



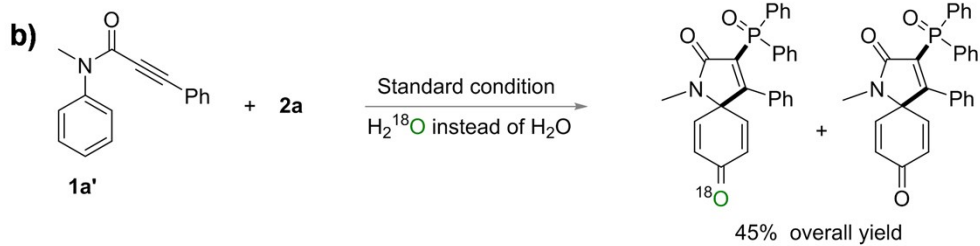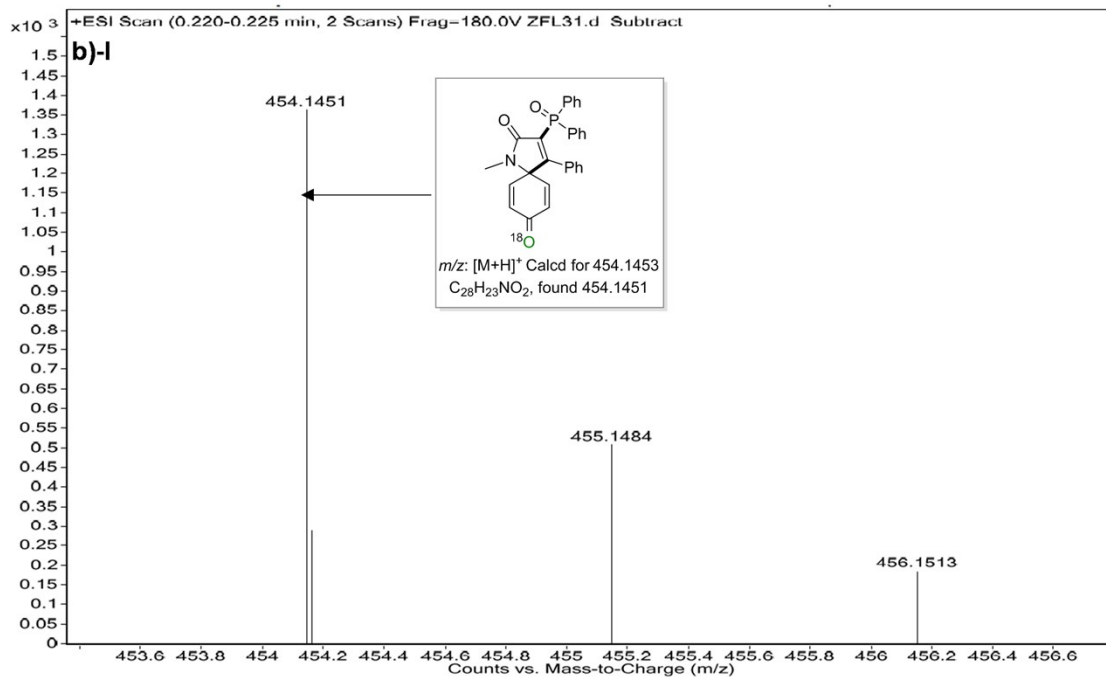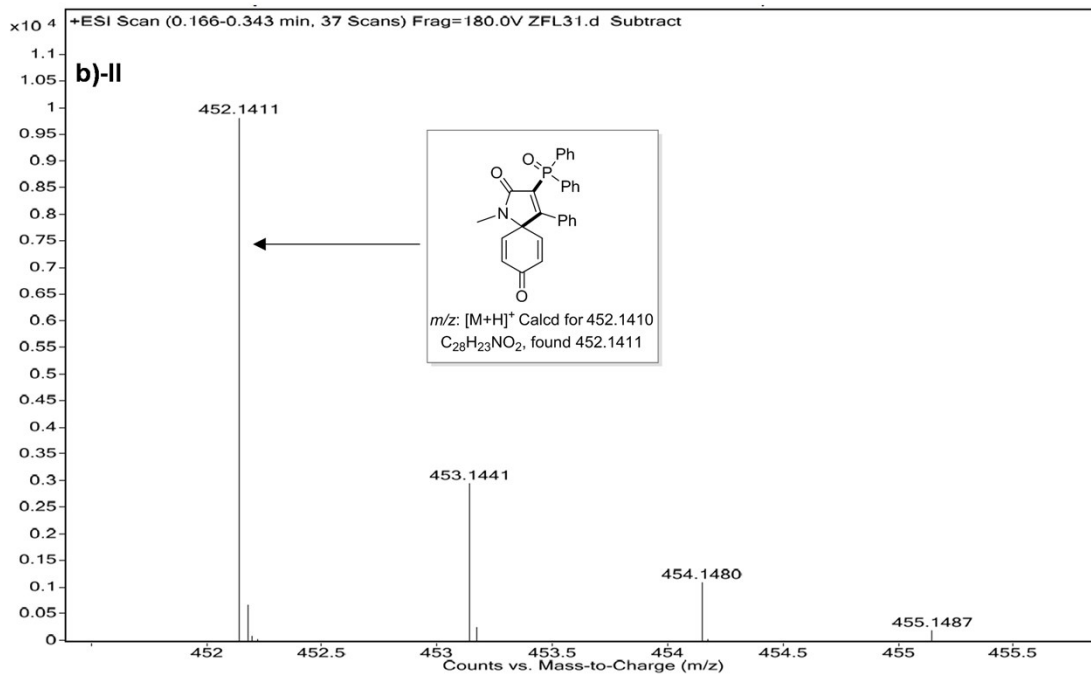

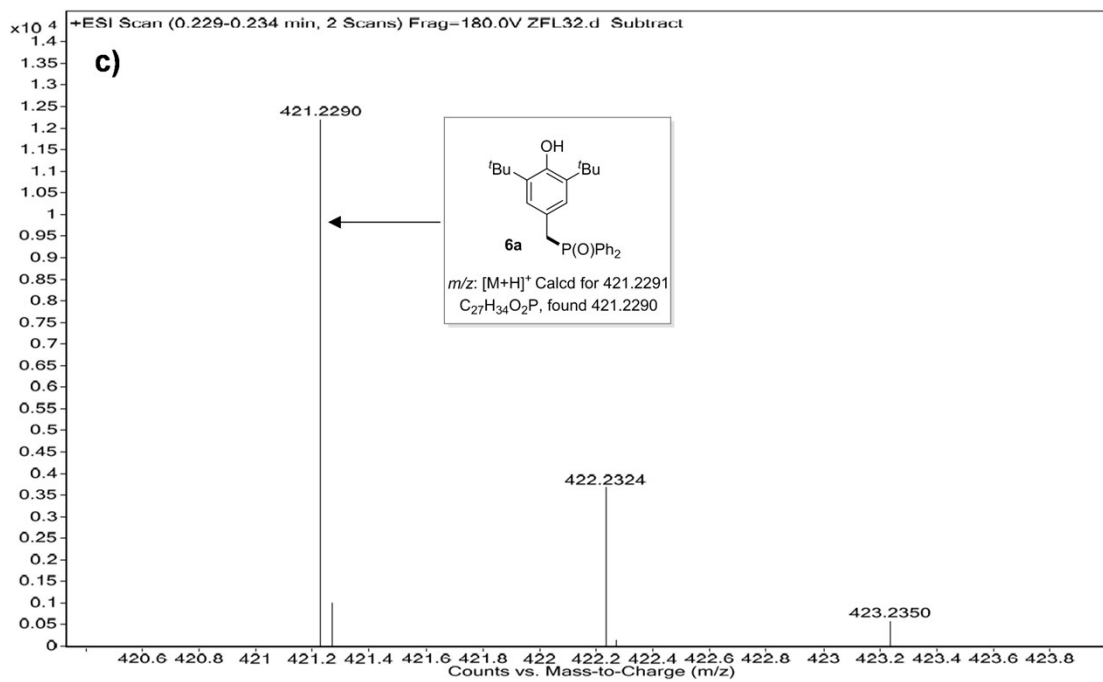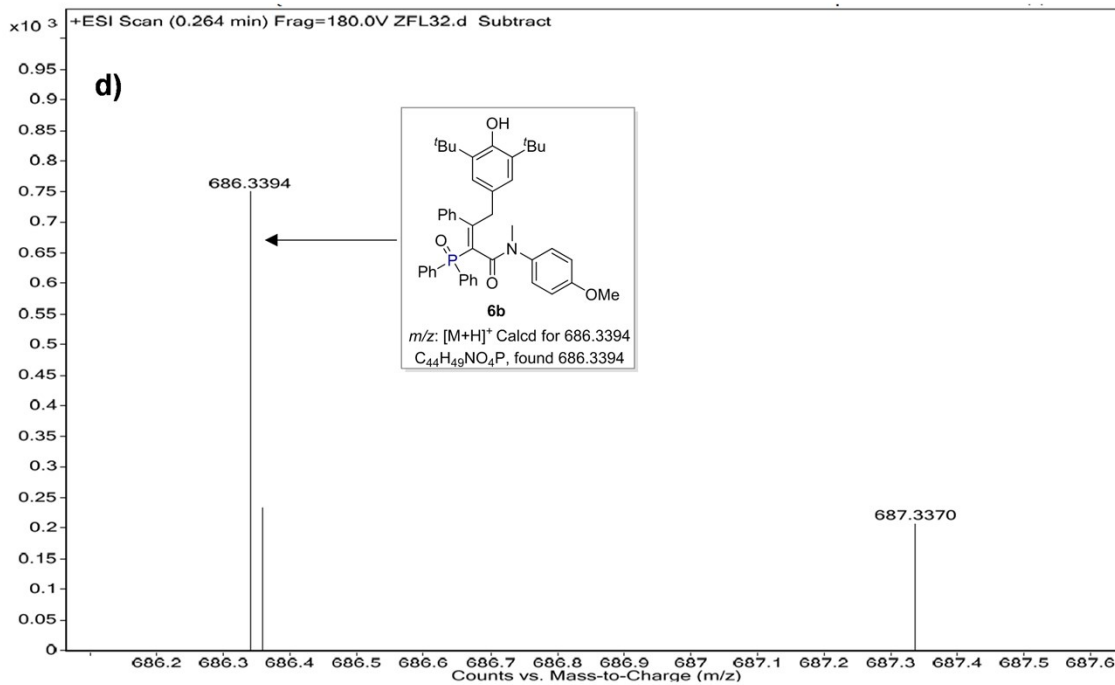

## 2.5 Procedure for emission quenching experiments

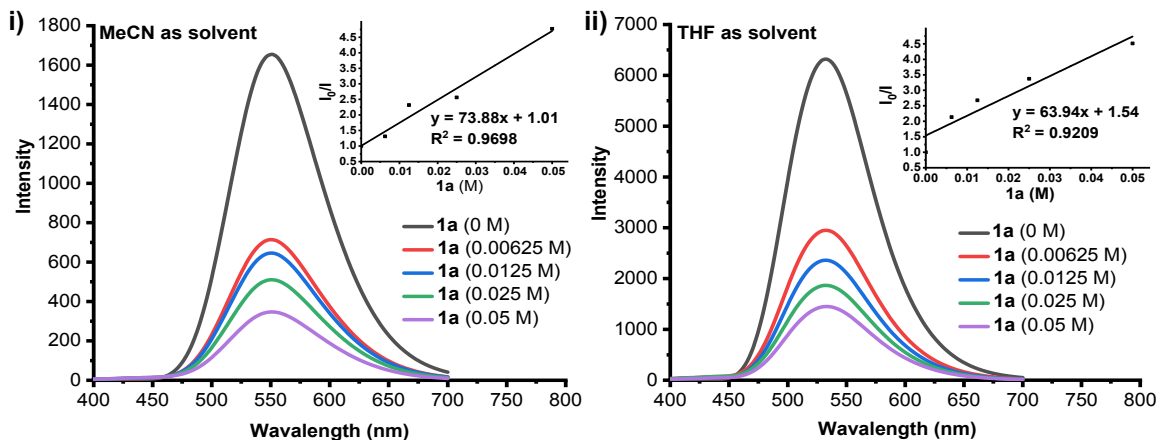

**Figure S2a.** The Stern-Volmer fluorescence quenching of **1a**

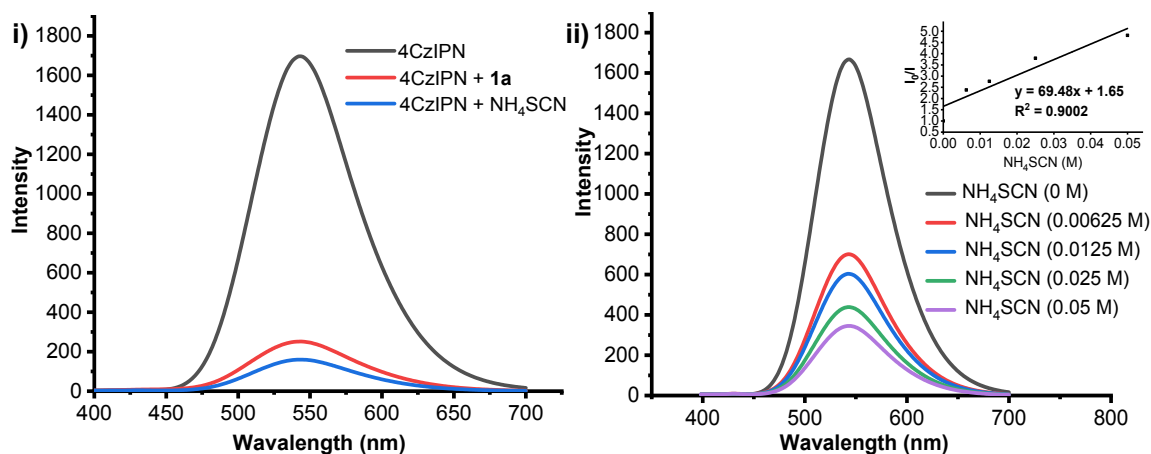

**Figure S2b.** The Stern-Volmer fluorescence quenching of  $\text{NH}_4\text{SCN}$

Emission intensities were recorded using an F-4600 FL Spectrophotometer. First, the emission intensity of 4CzIPN solutions was observed at 550 nm. The solutions were irradiated at 378 nm (Maximum absorption wavelength of 4CzIPN) and fluorescence was measured from 400 nm to 700 nm. In a typical experiment, the emission spectrum of a  $5 \times 10^{-5}$  M solution of 4CzIPN with different concentration of **1a**, **2a**, Togni-II, and LPO in degassed anhydrous  $\text{CH}_3\text{CN}$  or THF in 10 mm path length quartz cuvette was collected: Figure 2-i) the emission spectra of  $5 \times 10^{-5}$  M solutions of 4CzIPN with reactants (**1a**, **2a**, and LPO) in degassed anhydrous  $\text{CH}_3\text{CN}$ ; ii) the emission spectra of  $5 \times 10^{-5}$  M solutions of 4CzIPN with reactants (**1a** and Togni-II) in degassed anhydrous  $\text{CH}_3\text{CN}$ ; Figure S2ai-ii) the emission spectra of a  $5 \times 10^{-5}$  M solution of 4CzIPN with various concentrations of **1a** in degassed anhydrous  $\text{CH}_3\text{CN}$ /THF and the linear relationship between  $I_0/I$  and the increasing concentration of **1a** ( $I_0$  and  $I$  are the fluorescence intensities before and after the increasing the concentration of **1a**, respectively); Figure S2b: i) the emission spectra of  $5 \times 10^{-5}$  M solutions of 4CzIPN with reactants (**1a** and  $\text{NH}_4\text{SCN}$ ) in degassed anhydrous  $\text{CH}_3\text{CN}$ ; ii) The emission spectra of a  $5 \times 10^{-5}$  M solution of 4CzIPN with various concentrations of  $\text{NH}_4\text{SCN}$  in degassed anhydrous  $\text{CH}_3\text{CN}$ ; and the linear relationship between  $I_0/I$  and the increasing

concentration of  $\text{NH}_4\text{SCN}$  ( $I_0$  and  $I$  are the fluorescence intensities before and after the increasing the concentration of  $\text{NH}_4\text{SCN}$ , respectively).

## 2.6 Cyclic voltammograms of $\text{NH}_4\text{SCN}$

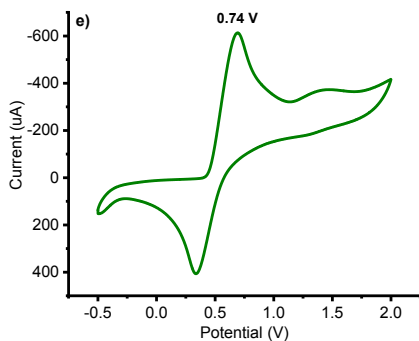

**Figure S3.** Cyclic voltammograms of 0.1 M  $\text{LiClO}_4$  and related compounds in  $\text{CH}_3\text{CN}$  using Pt working electrode, Pt wire, and saturated calomel electrode (SCE) as counter and reference electrode at 100 mV/s scan rate.  $\text{NH}_4\text{SCN}$  (0.02 M).

## 2.7 Proposed Reaction Mechanisms

We proposed a reasonable mechanism for the synthesis of **4a** (Figure S4-i). Initially, 4CzIPN is excited to form 4CzIPN\*, which subsequently transfers its energy to **1a**, leading to **1a\***. Then a SET process from **1a\*** to Togni-II occurs, rendering *N*-arylpropiolamide radical cation **1ab**, 2-iodobenzonate anion (**C**) as well as  $\text{CF}_3$  radical. After that,  $\text{CF}_3$  radical regioselectively adds to the triple bond of **1a**, resulting in the formation of alkenyl radical intermediate **7a**, which then undergoes an intramolecular cyclization, giving the azaspiro radical **7b**. Then by another additional SET process, **7b** is oxidized by **1ab** to resonance-stable cation **7c**, with the regeneration of a molecule of **1a**. **7c** continuously reacts with iodobenzonate **C**, leading to the desired **4a** together with methyl 2-iodobenzonate. As show as Figure S4-ii, 4CzIPN is first excited by blue light to its excited state (4CzIPN\*). Then, a single-electron transfer (SET) process from  $\text{SCN}^-$  to 4CzIPN\* occurs, resulting in the formation of SCN radical, meanwhile, 4CzIPN\* is changed into its radical anion (4CzIPN $^{\cdot-}$ ), which afterwards is oxidized by  $\text{O}_2$  in air to regenerate 4CzIPN for next photocatalytic cycle. Following that, SCN radical regioselectively adds to the triple bond of **1a**, rendering alkenyl radical **8a**, which then undergoes an intramolecular cyclization to give the corresponding azaspiro radical (**8b**). By another additional SET process, **8b** is oxidized by  $\text{O}_2$  in air to resonance-stable cation **7c**. At last, cation **8c** reacts with a water molecule nearby, leading to the formation of target product **5a** together with a methanol molecule.

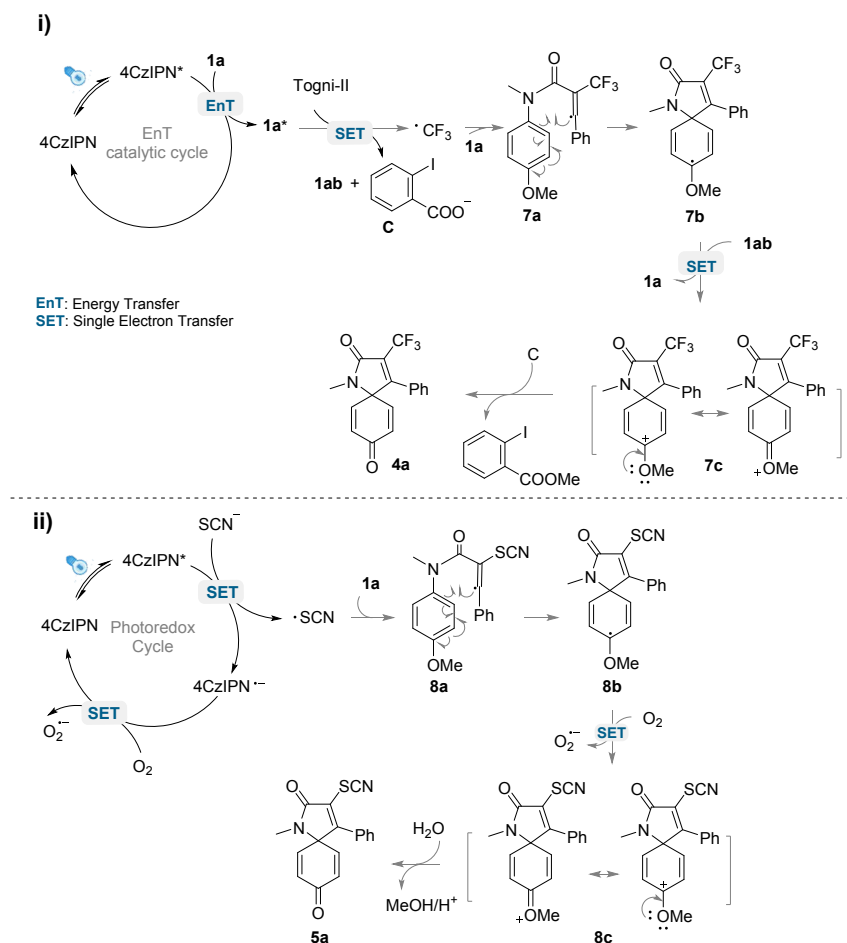

**Figure S4.** Proposed Reaction Mechanisms

### 3. Characterization Data for Products

*3-(diphenylphosphoryl)-1-methyl-4-phenyl-1-azaspiro[4.5]deca-3,6,9-triene-2,8-dione (3a)*<sup>6</sup>

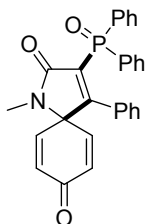

Light yellow solid (72 mg, 80% yield), mp 83 – 85 °C; <sup>1</sup>H NMR (400 MHz, Chloroform-*d*) δ 7.78 – 7.75 (m, 4H), 7.51 – 7.45 (m, 2H), 7.43 – 7.30 (m, 4H), 7.28 – 7.21 (m, 1H), 7.15 (dd, *J* = 8.6, 6.9 Hz, 2H), 7.11 – 7.05 (m, 2H), 6.51 (d, *J* = 10.2 Hz, 2H), 6.44 (d, *J* = 10.2 Hz, 2H), 2.84 (s, 3H). <sup>13</sup>C NMR (101 MHz, Chloroform-*d*) δ 183.53, 168.74 (d, *J* = 4.7 Hz), 168.20 (d, *J* = 14.1 Hz), 143.76, 133.75, 132.03 (d, *J* = 2.9 Hz), 131.66 (d, *J* = 110.0 Hz), 131.59 (d, *J* = 10.3 Hz), 131.46 (d, *J* = 100.2 Hz), 130.15 (d, *J* = 2.7 Hz), 129.93, 128.35 (d, *J* = 12.8 Hz), 128.13, 127.71, 69.63 (d, *J* = 10.9 Hz), 26.17. <sup>31</sup>P NMR (162 MHz, Chloroform-*d*) δ 18.41.

*3-(diphenylphosphoryl)-1-ethyl-4-phenyl-1-azaspiro[4.5]deca-3,6,9-triene-2,8-dione (3b)*

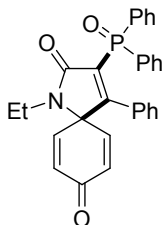

White solid (77 mg, 83% yield), mp 232 – 234 °C; <sup>1</sup>H NMR (400 MHz, Chloroform-*d*) δ 7.79 – 7.74 (m, 4H), 7.51 – 7.43 (m, 2H), 7.40 – 7.36 (m, 4H), 7.24 – 7.18 (m, 1H), 7.12 (dd, *J* = 8.6, 6.9 Hz, 2H), 7.07 – 7.01 (m, 2H), 6.57 (d, *J* = 10.1 Hz, 2H), 6.40 (d, *J* = 10.1 Hz, 2H). 3.31 (q, *J* = 7.2 Hz, 2H), 1.15 (t, *J* = 7.2 Hz, 3H). <sup>13</sup>C NMR (101 MHz, Chloroform-*d*) δ 184.29, 169.12 (d, *J* = 4.4 Hz), 168.71 (d, *J* = 14.7 Hz), 151.83, 143.90, 133.27, 132.55, 131.86 (d, *J* = 112.0 Hz), 131.71 (d, *J* = 140.0 Hz), 130.29, 129.93 (d, *J* = 2.8 Hz), 128.40 (dd, *J* = 12.8, 3.6 Hz), 128.05, 127.86, 71.86 (d, *J* = 10.7 Hz), 25.77, 17.85. <sup>31</sup>P NMR (162 MHz, Chloroform-*d*) δ 17.92. HRMS (ESI) *m/z*: [M+H]<sup>+</sup> Calcd for C<sub>29</sub>H<sub>25</sub>NO<sub>3</sub>P, 466.1567; Found: 466.1568.

*3-(diphenylphosphoryl)-4-phenyl-1-propyl-1-azaspiro[4.5]deca-3,6,9-triene-2,8-dione (3c)*

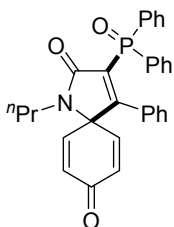

White solid (70 mg, 73% yield), mp 246 – 247 °C; <sup>1</sup>H NMR (400 MHz, Chloroform-*d*) δ 7.79 – 7.74 (m, 4H), 7.51 – 7.44 (m, 2H), 7.40 – 7.36 (m, 4H), 7.25 – 7.19 (m, 1H), 7.13 (t, *J* = 7.7 Hz, 2H), 7.09 – 7.02 (m, 2H), 6.56 (d, *J* = 10.1 Hz, 2H), 6.39 (d, *J* = 10.1 Hz, 2H), 3.27 – 3.13 (t, d, *J* = 7.8 Hz, 2H), 1.62 – 1.50 (m, 2H), 0.84 (t, *J* = 7.4 Hz, 3H). <sup>13</sup>C NMR (101 MHz, Chloroform-*d*) δ 183.75, 168.55 (d, *J* = 4.8 Hz), 168.34 (d, *J* = 14.1 Hz), 144.25, 133.19, 131.98 (d, *J* = 3.0 Hz), 131.70 (d, *J* = 100.6 Hz), 131.62 (d, *J* = 110.0 Hz), 131.52 (d, *J* = 10.3 Hz), 130.08 (d, *J* = 2.8 Hz), 129.81, 128.32 (d, *J* = 12.8 Hz), 128.16, 127.65, 70.03 (d, *J* = 10.7 Hz), 43.12, 22.99, 11.33. <sup>31</sup>P NMR (162 MHz, Chloroform-*d*) δ 18.01. HRMS (ESI) *m/z*: [M+H]<sup>+</sup> Calcd for C<sub>30</sub>H<sub>27</sub>NO<sub>3</sub>P, 480.1723; Found: 480.1724.

*1-butyl-3-(diphenylphosphoryl)-4-phenyl-1-azaspiro[4.5]deca-3,6,9-triene-2,8-dione (3d)*

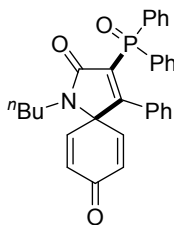

White solid (75 mg, 76% yield), mp 232 – 234 °C; <sup>1</sup>H NMR (400 MHz, Chloroform-*d*) δ 7.82 – 7.70 (m, 4H), 7.47 (td, *J* = 7.3, 1.6 Hz, 2H), 7.40 – 7.36 (m, 4H), 7.25 – 7.19 (m, 1H), 7.12 (t, *J* = 7.7 Hz, 2H), 7.04 (d, *J* = 7.4 Hz, 2H), 6.55 (d, *J* = 10.1 Hz, 2H), 6.39 (d, *J* = 10.0 Hz, 2H), 3.22 (dd, *J* = 8.9, 6.9 Hz, 2H), 1.59 – 1.45 (m, 2H), 1.31 – 1.19 (m, 3H), 0.86 (t, *J* = 7.3 Hz, 3H). <sup>13</sup>C NMR (101 MHz, Chloroform-*d*) δ 183.74, 168.49 (d, *J* = 4.8 Hz), 168.29 (d, *J* = 13.9 Hz), 144.28, 133.19, 131.95 (d, *J* = 2.9 Hz), 131.79 (d, *J* = 100.4 Hz), 131.70 (d, *J* = 109.9 Hz), 131.52 (d, *J* = 10.3 Hz), 130.10 (d, *J* = 2.9 Hz), 129.80, 128.31 (d, *J* = 12.8 Hz), 128.15, 127.64, 70.04 (d, *J* = 10.8 Hz), 41.37, 31.77, 20.20, 13.66. <sup>31</sup>P NMR (162 MHz, Chloroform-*d*) δ 17.85. HRMS (ESI) *m/z*: [M+H]<sup>+</sup> Calcd for C<sub>31</sub>H<sub>29</sub>NO<sub>3</sub>P, 494.1880; Found: 494.1879.

*1-acetyl-3-(diphenylphosphoryl)-4-phenyl-1-azaspiro[4.5]deca-3,6,9-triene-2,8-dione (3e)*

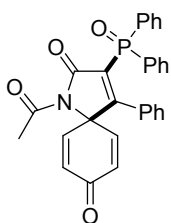

Light yellow solid (43 mg, 45% yield), mp 241 – 242 °C; <sup>1</sup>H NMR (400 MHz, Chloroform-*d*) δ 7.70 – 7.64 (m, 4H), 7.49 – 7.44 (m, 2H), 7.39 – 7.34 (m, 4H), 7.20 – 7.14 (m, 1H), 7.05 (dd, *J* = 8.5, 7.1 Hz, 2H), 6.89 – 6.87 (m, 2H), 6.56 (d, *J* = 10.0 Hz, 2H), 6.32 (d, *J* = 10.0 Hz, 2H), 2.52 (s, 3H). <sup>13</sup>C NMR (101 MHz, Chloroform-*d*) δ 183.60, 171.15 (d, *J* = 4.6 Hz), 168.96, 166.95 (d, *J* = 13.9 Hz), 144.51, 142.82, 132.72, 132.28 (d, *J* = 3.0 Hz), 131.33 (d, *J* = 10.4 Hz), 130.60 (d, *J* = 130.9 Hz), 130.41 (d, *J* = 93.3 Hz), 129.95, 128.54 (d, *J* = 12.9 Hz), 128.38, 127.41, 69.65 (d, *J* = 9.5 Hz), 25.73. <sup>31</sup>P NMR (162 MHz, Chloroform-*d*) δ 17.70. HRMS (ESI) *m/z*: [M+H]<sup>+</sup> Calcd for C<sub>29</sub>H<sub>23</sub>NO<sub>4</sub>P, 480.1359; Found: 480.1360.

*1-benzyl-3-(diphenylphosphoryl)-4-phenyl-1-azaspiro[4.5]deca-3,6,9-triene-2,8-dione (3f)*

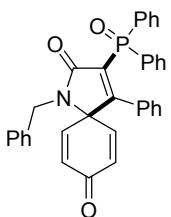

Light yellow solid (79 mg, 75% yield), mp 228 – 229 °C; <sup>1</sup>H NMR (400 MHz, Chloroform-*d*) δ 7.83 – 7.78 (m, 4H), 7.53 – 7.48 (m, 2H), 7.46 – 7.40 (m, 4H), 7.28 – 7.23 (m, 3H), 7.22 – 7.15 (m, 3H), 7.10 (dd, *J* = 8.5, 7.0 Hz, 2H), 7.05 – 6.96 (m, 2H), 6.34 (d, *J* = 10.1 Hz, 2H), 6.22 (d, *J* = 10.1 Hz, 2H), 4.51 (s, 2H). <sup>13</sup>C NMR (101 MHz, Chloroform-*d*) δ 183.68, 168.90 (d, *J* = 4.7 Hz), 168.31 (d, *J* = 14.0 Hz), 143.94, 137.18, 132.84, 132.57, 132.00 (d, *J* = 2.9 Hz), 131.65 (d, *J* = 110.0 Hz), 131.54 (d, *J* = 10.3 Hz), 131.36 (d, *J* = 100.4 Hz), 129.96 – 129.67 (m), 128.87, 128.54 (d, *J* = 5.1 Hz), 128.35 (d, *J* = 12.8 Hz), 128.17, 127.94, 127.57, 69.96 (d, *J* = 10.7 Hz), 44.77. <sup>31</sup>P NMR (162

MHz, Chloroform-*d*)  $\delta$  18.04. HRMS (ESI)  $m/z$ :  $[M+H]^+$  Calcd for  $C_{34}H_{27}NO_3P$ , 528.1723; Found: 528.1722.

*7-chloro-3-(diphenylphosphoryl)-1-methyl-4-phenyl-1-azaspiro[4.5]deca-3,6,9-triene-2,8-dione (3g)*

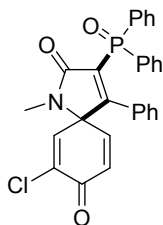

White solid (58 mg, 60% yield), mp 122 – 123 °C;  $^1H$  NMR (400 MHz, Chloroform-*d*)  $\delta$  7.82 – 7.73 (m, 4H), 7.53 – 7.36 (m, 6H), 7.27 – 7.22 (m, 1H), 7.21 – 7.13 (m, 2H), 7.07 – 7.02 (m, 2H), 6.99 (d,  $J = 2.7$  Hz, 1H), 6.55 (dd,  $J = 9.8, 2.8$  Hz, 1H), 6.49 (d,  $J = 9.9$  Hz, 1H), 2.87 (s, 3H).  $^{13}C$  NMR (101 MHz, Chloroform-*d*)  $\delta$  176.62, 167.91 (d,  $J = 14.1$  Hz), 167.52 (d,  $J = 4.8$  Hz), 144.06 (d,  $J = 51.9$  Hz), 139.52, 137.04, 132.66, 132.27 – 131.93 (m), 131.88 (d,  $J = 99.3$  Hz), 131.58 (dd,  $J = 10.4, 2.4$  Hz), 131.35 (dd,  $J = 110.1, 13.8$  Hz), 130.10, 129.63 (d,  $J = 2.7$  Hz), 128.79, 128.41 (dd,  $J = 12.8, 3.8$  Hz), 127.96 (d,  $J = 18.2$  Hz), 72.11 (d,  $J = 10.8$  Hz), 26.45.  $^{31}P$  NMR (162 MHz, Chloroform-*d*)  $\delta$  18.04. HRMS (ESI)  $m/z$ :  $[M+H]^+$  Calcd for  $C_{28}H_{22}ClNO_3P$ , 486.1020; Found: 486.1019.

*3-(diphenylphosphoryl)-1,7-dimethyl-4-phenyl-1-azaspiro[4.5]deca-3,6,9-triene-2,8-dione (3h)*

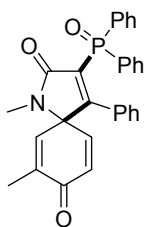

Light yellow oil (70 mg, 75% yield);  $^1H$  NMR (400 MHz, Chloroform-*d*)  $\delta$  7.81 – 7.75 (m, 4H), 7.51 – 7.45 (m, 2H), 7.43 – 7.36 (m, 4H), 7.25 – 7.19 (m, 1H), 7.17 – 7.10 (m, 2H), 7.07 – 7.01 (m, 2H), 6.47 (dd,  $J = 9.8, 3.0$  Hz, 1H), 6.39 (d,  $J = 9.8$  Hz, 1H), 6.28 (dd,  $J = 3.0, 1.5$  Hz, 1H), 2.82 (s, 3H), 1.89 (d,  $J = 1.5$  Hz, 3H).  $^{13}C$  NMR (101 MHz, Chloroform-*d*)  $\delta$  176.75, 167.85 (d,  $J = 21.2$  Hz), 167.80 (d,  $J = 2.4$  Hz), 144.40, 139.52, 137.04, 132.66, 132.15 (t,  $J = 2.8$  Hz), 131.89 (d,  $J = 99.3$  Hz), 131.58 (dd,  $J = 10.4, 1.7$  Hz), 131.37 (dd,  $J = 110.3, 12.1$  Hz), 130.11, 129.65 (d,  $J = 2.8$  Hz), 128.41 (dd,  $J = 12.8, 2.9$  Hz), 128.03 (d,  $J = 1.3$  Hz), 127.88, 71.38 (d,  $J = 11.0$  Hz), 26.41.  $^{31}P$  NMR (162 MHz, Chloroform-*d*)  $\delta$  18.26. HRMS (ESI)  $m/z$ :  $[M+H]^+$  Calcd for  $C_{29}H_{25}NO_3P$ , 466.1567; Found: 466.1568.

*3-(diphenylphosphoryl)-1,6-dimethyl-4-phenyl-1-azaspiro[4.5]deca-3,6,9-triene-2,8-dione (3i)*



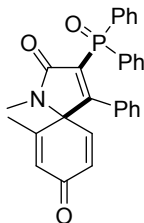

Light yellow oil (42 mg, 45% yield);  $^1\text{H}$  NMR (400 MHz, Chloroform-*d*)  $\delta$  7.83 – 7.75 (m, 4H), 7.52 – 7.47 (m, 2H), 7.45 – 7.39 (m, 4H), 7.31 – 7.21 (m, 1H), 7.20 – 7.06 (m, 4H), 6.52 – 6.40 (m, 2H), 6.32 (t,  $J = 1.5$  Hz, 1H), 2.74 (s, 3H), 1.80 (d,  $J = 1.4$  Hz, 3H).  $^{13}\text{C}$  NMR (101 MHz, Chloroform-*d*)  $\delta$  184.29, 169.12 (d,  $J = 4.4$  Hz), 168.71 (d,  $J = 14.7$  Hz), 151.83, 143.90, 133.27, 132.55, 132.09 (d,  $J = 3.1$  Hz), 131.92 (d,  $J = 100.4$  Hz), 131.85 (d,  $J = 110.3$  Hz), 131.52 (dd,  $J = 16.1, 10.4$  Hz), 131.01, 130.29, 129.93 (d,  $J = 2.8$  Hz), 128.40 (dd,  $J = 12.8, 3.6$  Hz), 127.95 (d,  $J = 18.6$  Hz), 71.86 (d,  $J = 10.7$  Hz), 25.77, 17.85.  $^{31}\text{P}$  NMR (162 MHz, Chloroform-*d*)  $\delta$  18.43. HRMS (ESI)  $m/z$ :  $[\text{M}+\text{H}]^+$  Calcd for  $\text{C}_{29}\text{H}_{25}\text{NO}_3\text{P}$ , 466.1567; Found: 466.1568.

*3-(diphenylphosphoryl)-1-methyl-4-(p-tolyl)-1-azaspiro[4.5]deca-3,6,9-triene-2,8-dione (3j)*

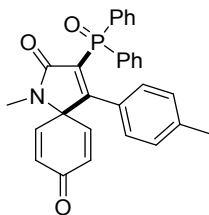

White solid (84 mg, 90% yield), mp 270 – 272 °C;  $^1\text{H}$  NMR (400 MHz, Chloroform-*d*)  $\delta$  7.86 – 7.74 (m, 4H), 7.52 – 7.48 (m, 2H), 7.44 – 7.39 (m, 4H), 7.09 – 6.92 (m, 4H), 6.58 – 6.40 (m, 4H), 2.84 (s, 3H), 2.26 (s, 3H).  $^{13}\text{C}$  NMR (101 MHz, Chloroform-*d*)  $\delta$  183.66, 169.07 (d,  $J = 4.6$  Hz), 168.34 (d,  $J = 14.6$  Hz), 143.99, 140.19, 133.65, 131.92 (d,  $J = 3.0$  Hz), 131.81 (d,  $J = 109.8$  Hz), 131.62 (d,  $J = 10.4$  Hz), 130.84 (d,  $J = 100.9$  Hz), 128.42 (d,  $J = 6.7$  Hz), 128.26, 128.10, 127.28 (d,  $J = 2.8$  Hz), 69.59 (d,  $J = 10.9$  Hz), 26.11, 21.35.  $^{31}\text{P}$  NMR (162 MHz, Chloroform-*d*)  $\delta$  18.33. HRMS (ESI)  $m/z$ :  $[\text{M}+\text{H}]^+$  Calcd for  $\text{C}_{29}\text{H}_{25}\text{NO}_3\text{P}$ , 466.1567; Found: 466.1567.

*4-(4-bromophenyl)-3-(diphenylphosphoryl)-1-methyl-1-azaspiro[4.5]deca-3,6,9-triene-2,8-dione (3k)*

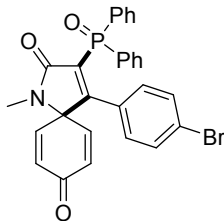

Light yellow solid (70 mg, 66% yield), mp 260 – 261 °C;  $^1\text{H}$  NMR (400 MHz, Chloroform-*d*)  $\delta$  7.81 – 7.75 (m, 4H), 7.56 – 7.48 (m, 2H), 7.46 – 7.38 (m, 4H), 7.30 (d,  $J = 8.5$  Hz, 2H), 6.96 (d,  $J = 8.5$  Hz, 2H), 6.54 – 6.40 (m, 4H), 2.84 (s, 3H).  $^{13}\text{C}$  NMR (101 MHz, Chloroform-*d*)  $\delta$  183.28,

167.94 (d,  $J = 14.1$  Hz), 167.43 (d,  $J = 4.4$  Hz), 143.42, 133.98, 132.27 (d,  $J = 99.3$  Hz), 132.22 (d,  $J = 2.9$  Hz), 131.60 (d,  $J = 10.6$  Hz), 131.33 (d,  $J = 110.0$  Hz), 131.01, 129.69, 129.00 (d,  $J = 2.9$  Hz), 128.48 (d,  $J = 12.8$  Hz), 124.66, 69.52 (d,  $J = 10.7$  Hz), 26.23.  $^{31}\text{P}$  NMR (162 MHz, Chloroform- $d$ )  $\delta$  18.47. HRMS (ESI)  $m/z$ :  $[\text{M}+\text{H}]^+$  Calcd for  $\text{C}_{28}\text{H}_{22}\text{BrNO}_3\text{P}$ , 530.0515; Found: 530.0515.

*4-(benzo[d][1,3]dioxol-4-yl)-3-(diphenylphosphoryl)-1-methyl-1-azaspiro[4.5]deca-3,6,9-triene-2,8-dione (3l)*

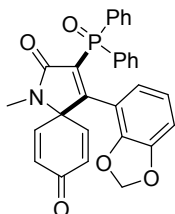

Light yellow solid (69 mg, 70% yield), mp 262 – 263 °C;  $^1\text{H}$  NMR (400 MHz, Chloroform- $d$ )  $\delta$  7.86 – 7.73 (m, 4H), 7.55 – 7.47 (m, 2H), 7.44 – 7.40 (m, 4H), 6.66 (dd,  $J = 8.1, 1.8$  Hz, 1H), 6.60 – 6.54 (m, 2H), 6.52 – 6.44 (m, 4H), 5.90 (s, 2H), 2.82 (s, 3H).  $^{13}\text{C}$  NMR (101 MHz, Chloroform- $d$ )  $\delta$  183.65, 168.30 (d,  $J = 4.9$  Hz), 168.10 (d,  $J = 5.2$  Hz), 149.19, 146.95, 143.98, 133.68, 132.02 (d,  $J = 2.9$  Hz), 131.55 (d,  $J = 10.4$  Hz), 131.53 (d,  $J = 110.1$  Hz), 130.76 (d,  $J = 101.2$  Hz), 128.38 (d,  $J = 12.8$  Hz), 123.64, 122.99, 108.68, 101.49, 69.46 (d,  $J = 10.7$  Hz), 26.08.  $^{31}\text{P}$  NMR (162 MHz, Chloroform- $d$ )  $\delta$  18.59. HRMS (ESI)  $m/z$ :  $[\text{M}+\text{H}]^+$  Calcd for  $\text{C}_{29}\text{H}_{23}\text{NO}_5\text{P}$ , 496.1308; Found: 496.1306.

*3-(diphenylphosphoryl)-1-methyl-4-(pyridin-4-yl)-1-azaspiro[4.5]deca-3,6,9-triene-2,8-dione (3m)*

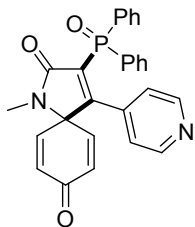

Light yellow solid (58 mg, 64% yield), mp 258 – 259 °C;  $^1\text{H}$  NMR (400 MHz, Chloroform- $d$ )  $\delta$  8.51 – 8.43 (m, 2H), 7.85 – 7.76 (m, 4H), 7.58 – 7.52 (m, 2H), 7.48 – 7.43 (m, 4H), 7.00 – 6.92 (m, 2H), 6.52 – 6.43 (m, 4H), 2.86 (s, 3H).  $^{13}\text{C}$  NMR (101 MHz, Chloroform- $d$ )  $\delta$  182.90, 167.53 (d,  $J = 13.9$  Hz), 165.37 (d,  $J = 4.1$  Hz), 149.11, 142.66, 138.31 (d,  $J = 2.9$  Hz), 134.28, 133.66 (d,  $J = 97.0$  Hz), 132.52 (d,  $J = 2.9$  Hz), 131.63 (d,  $J = 10.6$  Hz), 130.93 (d,  $J = 110.2$  Hz), 128.58 (d,  $J = 12.9$  Hz), 122.52, 69.41 (d,  $J = 10.5$  Hz), 26.31.  $^{31}\text{P}$  NMR (162 MHz, Chloroform- $d$ )  $\delta$  18.48. HRMS (ESI)  $m/z$ :  $[\text{M}+\text{H}]^+$  Calcd for  $\text{C}_{27}\text{H}_{22}\text{N}_2\text{O}_3\text{P}$ , 453.1363; Found: 453.1361.

*3-(diphenylphosphoryl)-1-methyl-4-(thiophen-3-yl)-1-azaspiro[4.5]deca-3,6,9-triene-2,8-dione (3n)*

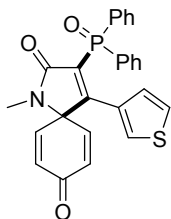

Light yellow solid (58 mg, 63% yield), mp 179 – 181 °C;  $^1\text{H}$  NMR (400 MHz, Chloroform-*d*)  $\delta$  7.83 – 7.77 (m, 4H), 7.71 (t,  $J = 2.1$  Hz, 1H), 7.54 – 7.49 (m, 2H), 7.46 – 7.40 (m, 4H), 7.18 – 7.07 (m, 2H), 6.53 (s, 4H), 2.79 (s, 3H).  $^{13}\text{C}$  NMR (101 MHz, Chloroform-*d*)  $\delta$  183.70, 168.23 (d,  $J = 14.3$  Hz), 162.89 (d,  $J = 4.3$  Hz), 144.57, 133.49, 132.08 (d,  $J = 2.9$  Hz), 131.55 (d,  $J = 10.3$  Hz), 131.49 (d,  $J = 110.1$  Hz), 130.45 (d,  $J = 3.2$  Hz), 129.33, 129.03 (d,  $J = 101.3$  Hz), 128.39 (d,  $J = 12.8$  Hz), 127.77, 125.70, 68.47 (d,  $J = 10.8$  Hz), 25.82.  $^{31}\text{P}$  NMR (162 MHz, Chloroform-*d*)  $\delta$  18.49. HRMS (ESI)  $m/z$ :  $[\text{M}+\text{H}]^+$  Calcd for  $\text{C}_{26}\text{H}_{21}\text{NO}_3\text{PS}$ , 458.0974; Found: 458.0975.

*3-(di-*m*-tolylphosphoryl)-1-methyl-4-phenyl-1-azaspiro[4.5]deca-3,6,9-triene-2,8-dione (3o)*

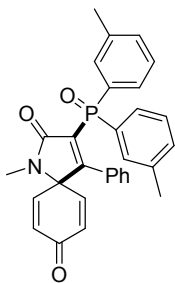

White solid (62 mg, 65% yield), mp 222 – 224 °C;  $^1\text{H}$  NMR (400 MHz, Chloroform-*d*)  $\delta$  7.42 – 7.31 (m, 4H), 7.23 – 7.18 (m, 5H), 7.12 (t,  $J = 7.6$  Hz, 2H), 7.01 (d,  $J = 7.1$  Hz, 2H), 6.60 – 6.39 (m, 4H), 2.86 (s, 3H), 2.47 (s, 6H).  $^{13}\text{C}$  NMR (101 MHz, Chloroform-*d*)  $\delta$  183.57, 168.27 (d,  $J = 4.7$  Hz), 168.11 (d,  $J = 13.3$  Hz), 143.86, 142.87 (d,  $J = 8.6$  Hz), 133.78, 132.65 (d,  $J = 13.3$  Hz), 132.10 (d,  $J = 2.8$  Hz), 131.78 (d,  $J = 11.1$  Hz), 130.69 (d,  $J = 123.6$  Hz), 130.10, 129.76 (d,  $J = 108.6$  Hz), 129.75, 127.93, 127.55, 125.41 (d,  $J = 13.4$  Hz), 69.69 (d,  $J = 10.6$  Hz), 26.26, 21.69 (d,  $J = 4.6$  Hz).  $^{31}\text{P}$  NMR (162 MHz, Chloroform-*d*)  $\delta$  25.02. HRMS (ESI)  $m/z$ :  $[\text{M}+\text{H}]^+$  Calcd for  $\text{C}_{30}\text{H}_{27}\text{NO}_3\text{P}$ , 480.1723; Found: 480.1725.

*3-(bis(4-fluorophenyl)phosphoryl)-1-methyl-4-phenyl-1-azaspiro[4.5]deca-3,6,9-triene-2,8-dione (3p)*

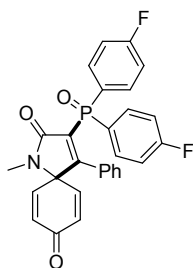

Light yellow solid (70 mg, 72% yield), mp 258 – 259 °C;  $^1\text{H}$  NMR (400 MHz, Chloroform-*d*)  $\delta$  7.84 – 7.73 (m, 4H), 7.31 – 7.26 (m, 1H), 7.19 (t,  $J = 7.7$  Hz, 2H), 7.21 – 7.17 (m, 6H), 6.55 – 6.40 (m, 4H), 2.85 (s, 3H).  $^{13}\text{C}$  NMR (101 MHz, Chloroform-*d*)  $\delta$  183.36, 169.26 (d,  $J = 4.8$  Hz), 168.12 (d,  $J = 14.6$  Hz), 165.15 (dd,  $J = 254.1, 3.4$  Hz), 143.36, 134.11 (dd,  $J = 12.0, 8.9$  Hz), 133.90, 131.02 (d,  $J = 102.5$  Hz), 130.09, 129.98 (d,  $J = 2.9$  Hz), 127.38 (dd,  $J = 113.8, 3.3$  Hz), 115.88 (dd,  $J = 21.5, 14.1$  Hz), 115.92, 69.77 (d,  $J = 11.1$  Hz), 26.20.  $^{31}\text{P}$  NMR (162 MHz, Chloroform-*d*)  $\delta$  16.66.  $^{19}\text{F}$  NMR (376 MHz, Chloroform-*d*)  $\delta$  -106.04. HRMS (ESI)  $m/z$ :  $[\text{M}+\text{H}]^+$  Calcd for  $\text{C}_{28}\text{H}_{21}\text{F}_2\text{NO}_3\text{P}$ , 488.1222; Found: 488.1223.

*Diethyl (1-methyl-2,8-dioxo-4-phenyl-1-azaspiro[4.5]deca-3,6,9-trien-3-yl)phosphonate (3q)*<sup>6</sup>

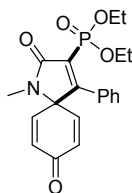

White solid (50 mg, 65% yield), mp 127-129 °C.  $^1\text{H}$  NMR (400 MHz, Chloroform-*d*)  $\delta$  7.42 – 7.30 (m, 3H), 7.26 – 7.15 (m, 2H), 6.61 – 6.38 (m, 4H), 4.17 – 3.96 (m, 4H), 2.88 (s, 3H), 1.10 (t,  $J = 7.1$  Hz, 6H).  $^{13}\text{C}$  NMR (151 MHz, Chloroform-*d*)  $\delta$  183.50, 167.79 (d,  $J = 17.9$  Hz), 165.35 (d,  $J = 8.2$  Hz), 143.61, 137.11, 133.72, 130.97 (d,  $J = 3.2$  Hz), 129.94, 128.89 (d,  $J = 203.0$  Hz), 127.97 (d,  $J = 5.1$  Hz), 69.35 (d,  $J = 15.4$  Hz), 62.94 (d,  $J = 6.1$  Hz), 26.10, 16.07 (d,  $J = 6.7$  Hz).  $^{31}\text{P}$  NMR (162 MHz, Chloroform-*d*)  $\delta$  7.47.

*Diethyl (1,6-dimethyl-2,8-dioxo-4-phenyl-1-azaspiro[4.5]deca-3,6,9-trien-3-yl)phosphonate (3r)*<sup>6</sup>

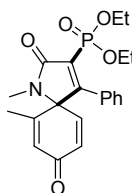

Light yellow oil (34 mg, 42% yield).  $^1\text{H}$  NMR (400 MHz, Chloroform-*d*)  $\delta$  7.39 (dd,  $J = 6.8, 2.0$  Hz, 1H), 7.34 (dd,  $J = 8.4, 6.6$  Hz, 2H), 7.27 – 7.22 (m, 2H), 6.49 (d,  $J = 2.2$  Hz, 2H), 6.32 (t,  $J = 1.5$  Hz, 1H), 4.16 – 4.02 (m, 4H), 2.81 (s, 3H), 1.81 (d,  $J = 1.4$  Hz, 3H), 1.13 (td,  $J = 7.1, 1.8$  Hz, 6H).  $^{13}\text{C}$  NMR (151 MHz, Chloroform-*d*)  $\delta$  183.24, 167.21 (d,  $J = 17.4$  Hz), 164.81 (d,  $J = 7.7$  Hz), 151.01, 142.71, 131.82 (d,  $J = 141.7$  Hz), 129.71 (d,  $J = 3.4$  Hz), 129.22, 128.27 (d,  $J = 201.9$  Hz), 127.09, 126.83, 125.52 (d,  $J = 374.9$  Hz), 70.59 (d,  $J = 15.0$  Hz), 61.93 (dd,  $J = 17.1, 6.0$  Hz), 24.71, 16.78, 15.07 (dd,  $J = 6.7, 2.4$  Hz).  $^{31}\text{P}$  NMR (162 MHz, Chloroform-*d*)  $\delta$  7.42.

*2-(diphenylphosphoryl)-1-phenyl-6,7-dihydro-3H-pyrrolo[2,1-j]quinoline-3,9(5H)-dione (3a'')*

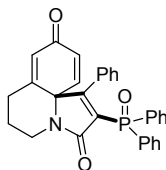

Light yellow solid (76 mg, 80% yield), mp 89 – 90 °C; <sup>1</sup>H NMR (400 MHz, Chloroform-*d*) δ 7.74 (td, *J* = 12.0, 7.0 Hz, 4H), 7.52 – 7.36 (m, 6H), 7.21 (t, *J* = 7.5 Hz, 1H), 7.11 (t, *J* = 7.6 Hz, 2H), 6.90 – 6.81 (m, 2H), 6.58 (d, *J* = 9.7 Hz, 1H), 6.32 – 6.19 (m, 2H), 4.12 (dd, *J* = 14.1, 9.0 Hz, 1H), 2.82 – 2.74 (m, 1H), 2.45 (dd, *J* = 13.0, 8.4 Hz, 2H), 2.08 – 1.95 (m, 1H), 1.83 – 1.77 (m, 1H). <sup>13</sup>C NMR (101 MHz, Chloroform-*d*) δ. <sup>13</sup>C NMR (101 MHz, Chloroform-*d*) δ 184.06, 172.27 (d, *J* = 13.9 Hz), 170.13 (d, *J* = 5.2 Hz), 157.06, 144.87, 132.96, 132.22, 132.03 (t, *J* = 3.6 Hz), 131.77 (d, *J* = 176.4 Hz), 131.45 (dd, *J* = 16.0, 10.4 Hz), 131.40 (d, *J* = 53.3 Hz), 129.61, 129.34, 129.15 (d, *J* = 2.8 Hz), 128.42, 128.41, 128.29, 128.26, 127.39. <sup>31</sup>P NMR (162 MHz, Chloroform-*d*) δ 17.82. HRMS (ESI) *m/z*: [M+H]<sup>+</sup> Calcd for C<sub>30</sub>H<sub>25</sub>NO<sub>3</sub>P, 478.1567; Found: 478.1566.

*1-methyl-4-phenyl-3-(trifluoromethyl)-1-azaspiro[4.5]deca-3,6,9-triene-2,8-dione (4a)*<sup>4</sup>

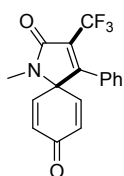

Yellow solid (45 mg, 70% yield), mp 162 – 164 °C; <sup>1</sup>H NMR (400 MHz, Chloroform-*d*) δ 7.45 – 7.39 (m, 1H), 7.35 (dd, *J* = 8.3, 6.6 Hz, 2H), 7.16 – 7.09 (m, 2H), 6.55 – 6.44 (m, 4H), 2.92 (s, 3H). <sup>13</sup>C NMR (151 MHz, Chloroform-*d*) δ 183.17, 164.54, 159.47 (q, *J* = 3.4 Hz), 142.62, 134.20, 130.35, 128.82, 128.32, 127.52, 126.55 (q, *J* = 33.6 Hz), 120.38 (q, *J* = 272.5 Hz), 67.94, 26.19.

*1-ethyl-4-phenyl-3-(trifluoromethyl)-1-azaspiro[4.5]deca-3,6,9-triene-2,8-dione (4b)*

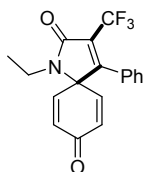

White solid (45 mg, 68% yield), mp 175 – 176 °C; <sup>1</sup>H NMR (400 MHz, Chloroform-*d*) δ 7.47 – 7.29 (m, 3H), 7.16 – 7.06 (m, 2H), 6.57 (d, *J* = 10.1 Hz, 2H), 6.44 (d, *J* = 10.1 Hz, 2H), 3.39 (q, *J* = 7.2 Hz, 2H), 1.23 (t, *J* = 7.2 Hz, 3H). <sup>13</sup>C NMR (151 MHz, Chloroform-*d*) δ 183.38, 164.50, 159.34 (q, *J* = 3.3 Hz), 143.04, 133.66, 130.27, 128.80, 128.28, 127.56, 126.82 (q, *J* = 33.6 Hz), 120.38 (q, *J* = 272.4 Hz), 68.30, 36.35, 15.03. <sup>19</sup>F NMR (376 MHz, Chloroform-*d*) δ -60.63. HRMS (ESI) *m/z*: [M+H]<sup>+</sup> Calcd for C<sub>18</sub>H<sub>15</sub>F<sub>3</sub>NO<sub>2</sub>, 334.1049; Found: 334.1064.

*4-phenyl-1-propyl-3-(trifluoromethyl)-1-azaspiro[4.5]deca-3,6,9-triene-2,8-dione (4c)*

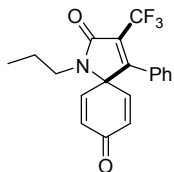

White solid (55 mg, 73% yield), mp 128 – 129 °C; <sup>1</sup>H NMR (400 MHz, Chloroform-*d*) δ 7.44 – 7.31 (m, 3H), 7.14 – 7.06 (m, 2H), 6.55 (d, *J* = 10.2 Hz, 2H), 6.43 (d, *J* = 10.2 Hz, 2H), 3.31 – 3.21 (m, 2H), 1.69 – 1.56 (m, 2H), 0.92 (t, *J* = 7.4 Hz, 3H). <sup>13</sup>C NMR (151 MHz, Chloroform-*d*) δ 183.37, 164.78, 159.32 (q, *J* = 3.5 Hz), 143.13, 133.66, 130.27, 128.80, 128.27, 127.58, 126.81 (q, *J* = 33.7 Hz), 120.37 (q, *J* = 272.6 Hz), 68.33, 43.32, 22.91, 11.38. <sup>19</sup>F NMR (376 MHz, Chloroform-*d*) δ -60.65. HRMS (ESI) *m/z*: [M+H]<sup>+</sup> Calcd for C<sub>19</sub>H<sub>17</sub>F<sub>3</sub>NO<sub>2</sub>, 348.1206; Found: 348.1217.

*1-butyl-4-phenyl-3-(trifluoromethyl)-1-azaspiro[4.5]deca-3,6,9-triene-2,8-dione (4d)*

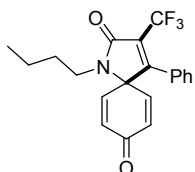

Light yellow solid (52 mg, 72% yield), mp 111 – 113 °C; <sup>1</sup>H NMR (400 MHz, Chloroform-*d*) δ 7.46 – 7.31 (m, 3H), 7.14 – 7.03 (m, 2H), 6.60 – 6.52 (m, 2H), 6.46 – 6.37 (m, 2H), 3.36 – 3.25 (m, 2H), 1.65 – 1.50 (m, 2H), 1.38 – 1.28 (m, 2H), 0.92 (t, *J* = 7.4 Hz, 3H). <sup>13</sup>C NMR (101 MHz, Chloroform-*d*) δ 183.39, 164.75, 159.28 (q, *J* = 3.4 Hz), 143.13, 133.64, 130.25, 128.77, 128.25, 127.55 (d, *J* = 1.6 Hz), 126.78 (q, *J* = 33.7 Hz), 120.35 (q, *J* = 272.5 Hz), 68.33, 41.47, 31.67, 20.16, 13.62. <sup>19</sup>F NMR (376 MHz, Chloroform-*d*) δ -60.65. HRMS (ESI) *m/z*: [M+H]<sup>+</sup> Calcd for C<sub>20</sub>H<sub>19</sub>F<sub>3</sub>NO<sub>2</sub>, 362.1362; Found: 362.1362.

*1-benzyl-4-phenyl-3-(trifluoromethyl)-1-azaspiro[4.5]deca-3,6,9-triene-2,8-dione (4e)*

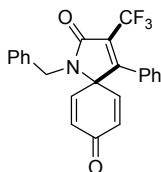

Light yellow solid (51 mg, 65% yield), mp 125 – 127 °C; <sup>1</sup>H NMR (400 MHz, Chloroform-*d*) δ 7.41 – 7.21 (m, 8H), 7.12 – 6.96 (m, 2H), 6.44 – 6.15 (m, 4H), 4.56 (s, 2H). <sup>13</sup>C NMR (151 MHz, Chloroform-*d*) δ 183.37, 164.71, 159.84, 142.86, 136.72, 133.28, 130.27, 129.02, 128.68, 128.56, 128.19, 128.15, 127.56, 126.42 (q, *J* = 33.6 Hz), 120.40 (q, *J* = 272.0 Hz), 68.29, 44.97. <sup>19</sup>F NMR (376 MHz, Chloroform-*d*) δ -60.53. HRMS (ESI) *m/z*: [M+H]<sup>+</sup> Calcd for C<sub>23</sub>H<sub>17</sub>F<sub>3</sub>NO<sub>2</sub>, 396.1206; Found: 396.1207.

*7-chloro-1-methyl-4-phenyl-3-(trifluoromethyl)-1-azaspiro[4.5]deca-3,6,9-triene-2,8-dione (4f)<sup>4</sup>*

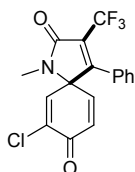

White solid (39 mg, 55% yield), mp 150 – 152 °C; <sup>1</sup>H NMR (400 MHz, Chloroform-*d*) δ 7.46 – 7.35 (m, 3H), 7.14 – 7.07 (m, 2H), 6.75 (d, *J* = 2.2 Hz, 1H), 6.61 – 6.51 (m, 2H), 2.95 (s, 3H). <sup>13</sup>C NMR (151 MHz, Chloroform-*d*) δ 176.43, 164.19, 158.74 (d, *J* = 3.4 Hz), 143.25, 138.39, 137.55, 133.14, 130.58, 128.51, 128.33, 127.45, 126.80 (q, *J* = 34.0 Hz), 120.22 (q, *J* = 272.6 Hz), 69.67, 26.43.

*1-methyl-4-phenyl-3-thiocyanato-1-azaspiro[4.5]deca-3,6,9-triene-2,8-dione (5a)*<sup>3</sup>

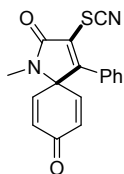

White solid (49 mg, 80% yield), mp 155 – 157 °C; <sup>1</sup>H NMR (400 MHz, Chloroform-*d*) δ 7.52 – 7.41 (m, 3H), 7.31 – 7.22 (m, 2H), 6.53 (s, 4H), 2.95 (s, 3H). <sup>13</sup>C NMR (101 MHz, Chloroform-*d*) δ 183.30, 164.95, 156.99, 143.07, 133.97, 131.13, 129.10, 128.87, 127.78, 122.34, 106.26, 68.37, 26.58.

*1-ethyl-4-phenyl-3-thiocyanato-1-azaspiro[4.5]deca-3,6,9-triene-2,8-dione (5b)*<sup>3</sup>

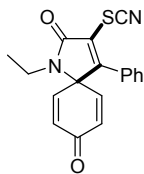

White solid (42 mg, 65% yield), mp 144 – 146 °C; <sup>1</sup>H NMR (400 MHz, Chloroform-*d*) δ 7.48 – 7.44 (m, 3H), 7.28 – 7.18 (m, 2H), 6.63 – 6.45 (m, 4H), 3.41 (q, *J* = 7.2 Hz, 2H), 1.25 (t, *J* = 7.2 Hz, 3H). <sup>13</sup>C NMR (101 MHz, Chloroform-*d*) δ 183.53, 164.87, 156.72, 143.46, 133.43, 130.98, 129.02, 128.87, 127.81, 122.64, 106.29, 68.81, 36.77, 15.05.

*4-phenyl-1-propyl-3-thiocyanato-1-azaspiro[4.5]deca-3,6,9-triene-2,8-dione (7c)*

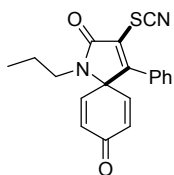

Yellow solid (50 mg, 75% yield), mp 153 – 154 °C; <sup>1</sup>H NMR (400 MHz, Chloroform-*d*) δ 7.49 – 7.39 (m, 3H), 7.27 – 7.20 (m, 2H), 6.62 – 6.54 (m, 2H), 6.52 – 6.42 (m, 2H), 3.35 – 3.23 (m, 2H), 1.70 – 1.61 (m, 2H), 0.92 (t, *J* = 7.4 Hz, 3H). <sup>13</sup>C NMR (101 MHz, Chloroform-*d*) δ 183.53, 165.16, 156.68, 143.55, 133.41, 130.96, 129.00, 128.86, 127.83, 122.65, 106.28, 68.86, 43.72, 22.90, 11.39. HRMS (ESI) *m/z*: [M+H]<sup>+</sup> Calcd for C<sub>19</sub>H<sub>17</sub>N<sub>2</sub>O<sub>2</sub>S, 337.1005; Found: 337.1006.

*1-butyl-4-phenyl-3-thiocyanato-1-azaspiro[4.5]deca-3,6,9-triene-2,8-dione (5d)*

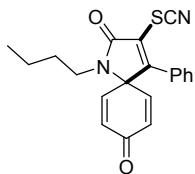

Light yellow solid (64 mg, 91% yield), mp 170 – 171 °C;  $^1\text{H}$  NMR (400 MHz, Chloroform-*d*)  $\delta$  7.50 – 7.38 (m, 3H), 7.25 – 7.22 (m, 2H), 6.58 (d,  $J = 10.2$  Hz, 2H), 6.48 (d,  $J = 10.1$  Hz, 2H), 3.37 – 3.30 (m, 2H), 1.65 – 1.56 (m, 2H), 1.38 – 1.28 (m, 2H), 0.91 (t,  $J = 7.3$  Hz, 3H).  $^{13}\text{C}$  NMR (101 MHz, Chloroform-*d*)  $\delta$  183.52, 165.11, 156.61, 143.56, 133.41, 130.96, 129.00, 128.87, 127.82, 122.66, 106.26, 68.86, 41.90, 31.65, 20.16, 13.63. HRMS (ESI)  $m/z$ :  $[\text{M}+\text{H}]^+$  Calcd for  $\text{C}_{20}\text{H}_{19}\text{N}_2\text{O}_2\text{S}$ , 351.1162; Found: 351.1162.

*1-acetyl-4-phenyl-3-thiocyanato-1-azaspiro[4.5]deca-3,6,9-triene-2,8-dione (5e)*<sup>3</sup>

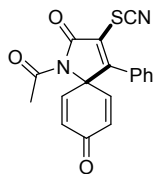

Light yellow solid (30 mg, 45% yield), mp 205 – 207 °C;  $^1\text{H}$  NMR (400 MHz, Chloroform-*d*)  $\delta$  7.55 – 7.38 (m, 3H), 7.21 – 7.06 (m, 2H), 6.55 (d,  $J = 9.9$  Hz, 2H), 6.51 – 6.33 (m, 2H), 2.65 (s, 3H).  $^{13}\text{C}$  NMR (101 MHz, Chloroform-*d*)  $\delta$  183.39, 168.45, 163.76, 161.54, 141.94, 133.00, 131.47, 128.98, 127.99, 127.56, 122.28, 105.66, 68.53, 25.67.

*1-benzyl-4-phenyl-3-thiocyanato-1-azaspiro[4.5]deca-3,6,9-triene-2,8-dione (5f)*<sup>3</sup>

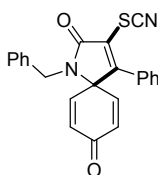

White solid (52 mg, 72% yield), mp 140 – 141 °C;  $^1\text{H}$  NMR (400 MHz, Chloroform-*d*)  $\delta$  7.47 – 7.35 (m, 3H), 7.31 – 7.23 (m, 5H), 7.19 – 7.16 (m, 2H), 6.40 – 6.24 (m, 4H), 4.59 (s, 2H).  $^{13}\text{C}$  NMR (101 MHz, Chloroform-*d*)  $\delta$  183.51, 165.16, 157.31, 143.26, 136.55, 133.08, 131.02, 128.99, 128.72, 128.67, 128.22, 127.82, 122.35, 106.26, 68.84, 45.47.

*1,6-dimethyl-4-phenyl-3-thiocyanato-1-azaspiro[4.5]deca-3,6,9-triene-2,8-dione (5g)*<sup>3</sup>

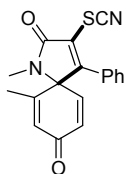



Light yellow solid (50 mg, 78% yield), mp 145 – 146 °C; <sup>1</sup>H NMR (400 MHz, Chloroform-*d*) δ 7.54 – 7.40 (m, 3H), 7.29 – 7.26 (m, 2H), 6.59 – 6.46 (m, 2H), 6.43 – 6.32 (m, 1H), 2.86 (s, 3H), 1.77 (d, *J* = 1.4 Hz, 3H). <sup>13</sup>C NMR (101 MHz, Chloroform-*d*) δ 184.06, 165.41, 157.41, 151.58, 143.27, 133.45, 132.57, 131.33, 129.26, 128.73, 127.56, 122.33, 106.35, 70.50, 26.15, 17.71.

*1-methyl-3-thiocyanato-4-(thiophen-3-yl)-1-azaspiro[4.5]deca-3,6,9-triene-2,8-dione (5h)*

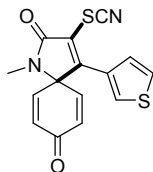

Light yellow solid (50 mg, 80% yield), mp 142 – 144 °C; <sup>1</sup>H NMR (400 MHz, Chloroform-*d*) δ 7.75 (dd, *J* = 2.9, 1.5 Hz, 1H), 7.48 – 7.38 (m, 2H), 6.64 – 6.52 (m, 4H), 2.92 (s, 3H). <sup>13</sup>C NMR (101 MHz, Chloroform-*d*) δ 183.47, 165.23, 151.69, 144.08, 133.65, 129.45, 128.85, 127.54, 126.35, 118.88, 106.49, 67.26, 26.21. HRMS (ESI) *m/z*: [M+H]<sup>+</sup> Calcd for C<sub>15</sub>H<sub>11</sub>N<sub>2</sub>O<sub>2</sub>S<sub>2</sub>, 315.0256; Found: 315.0225.

## 4. NMR Copies of Products

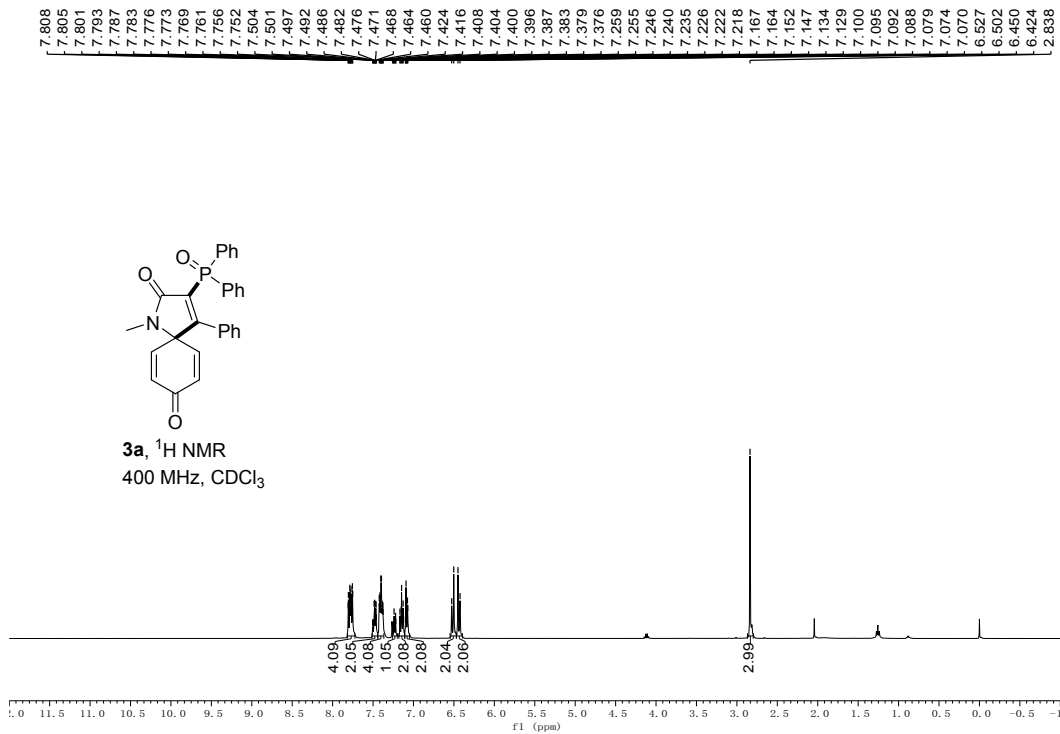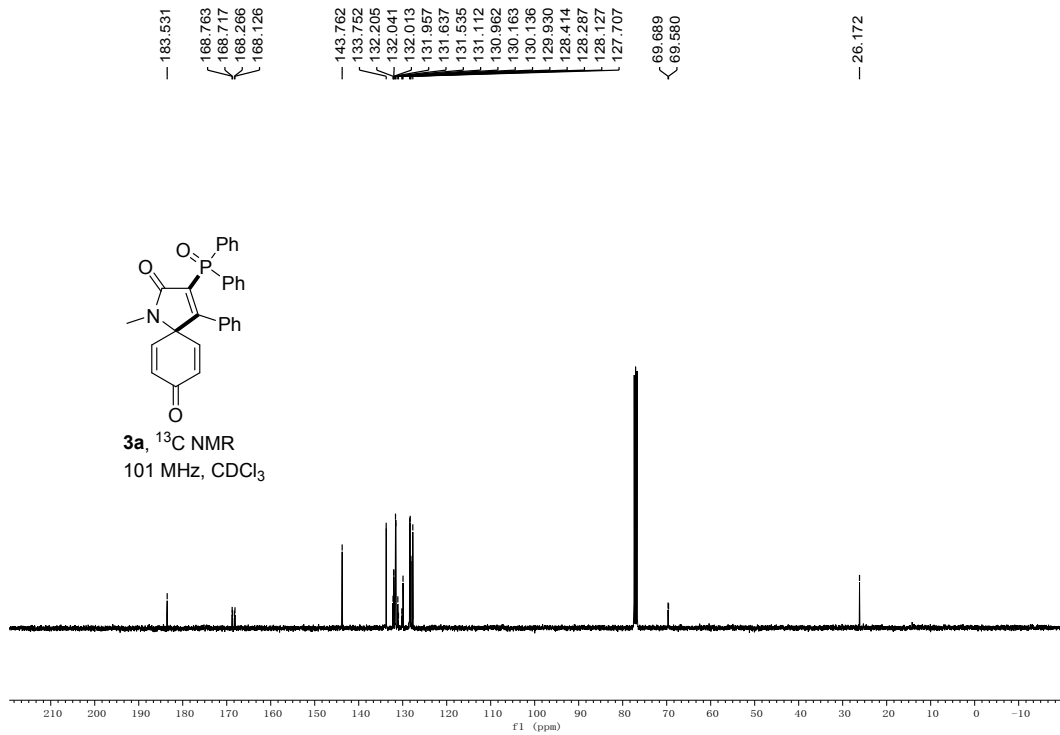

- 18.409

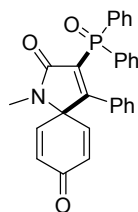

**3a**,  $^{31}\text{P}$  NMR  
162 MHz,  $\text{CDCl}_3$

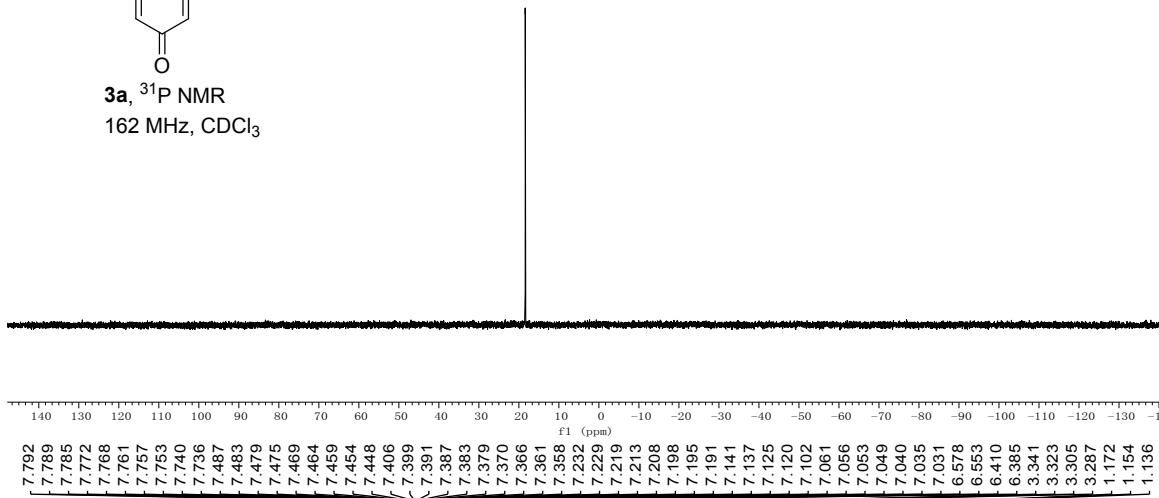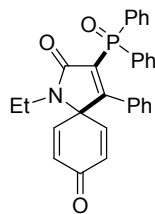

**3b**,  $^1\text{H}$  NMR  
400 MHz,  $\text{CDCl}_3$

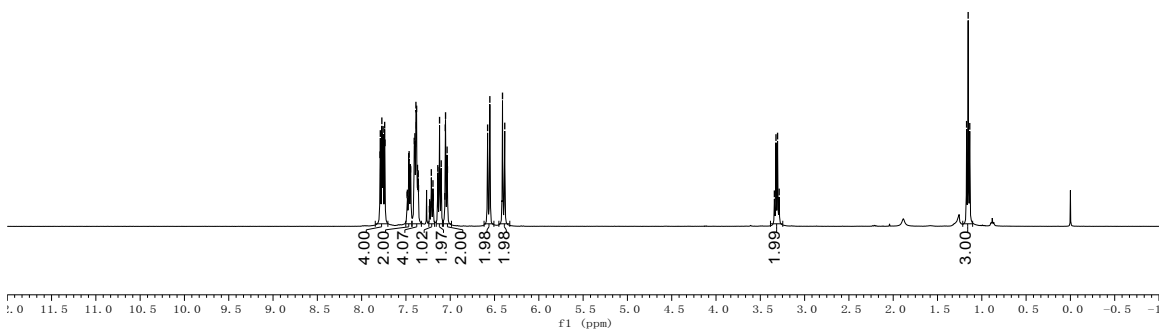

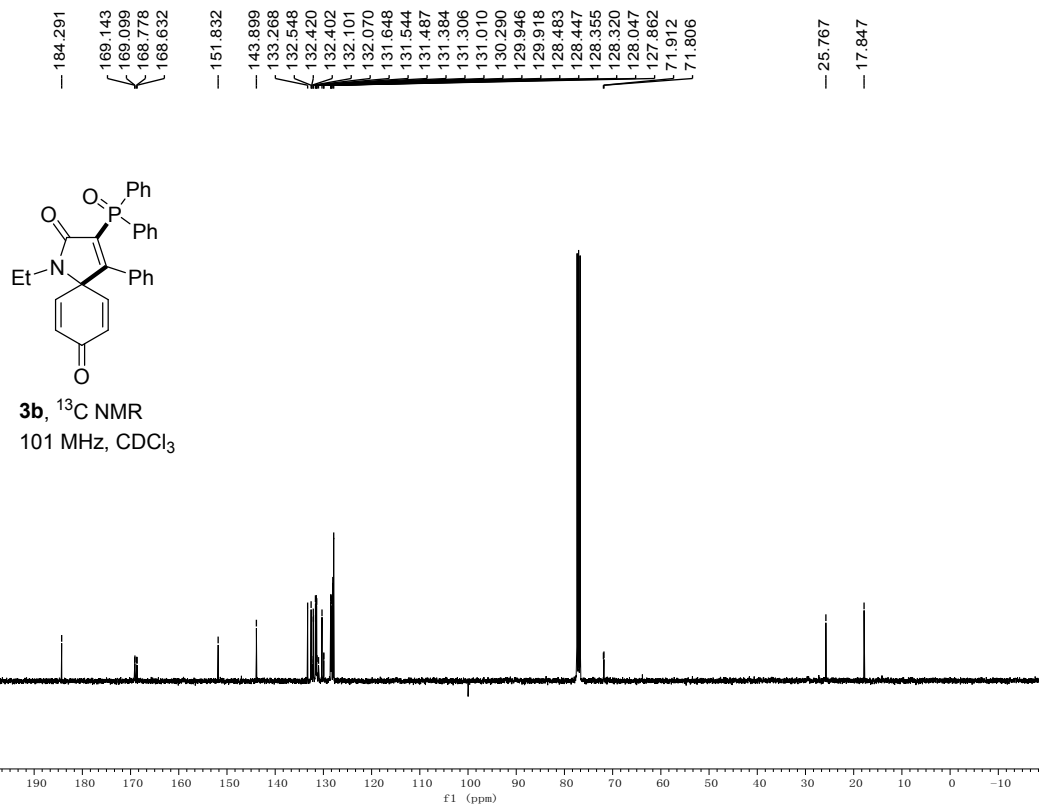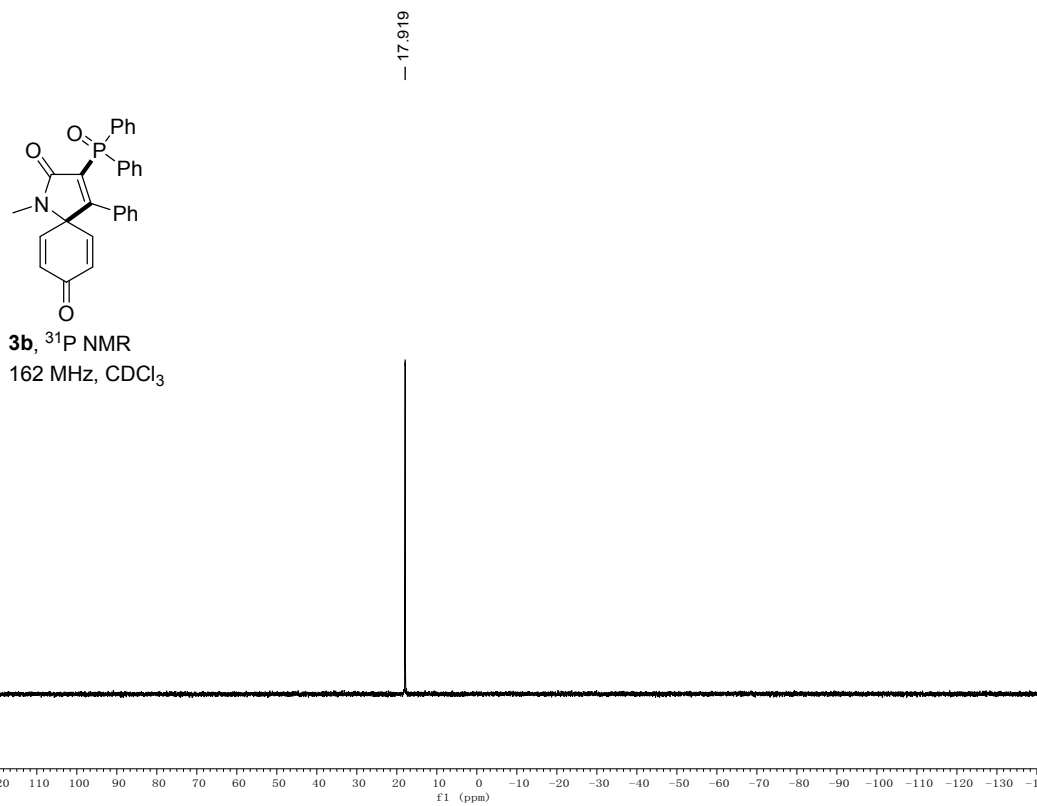

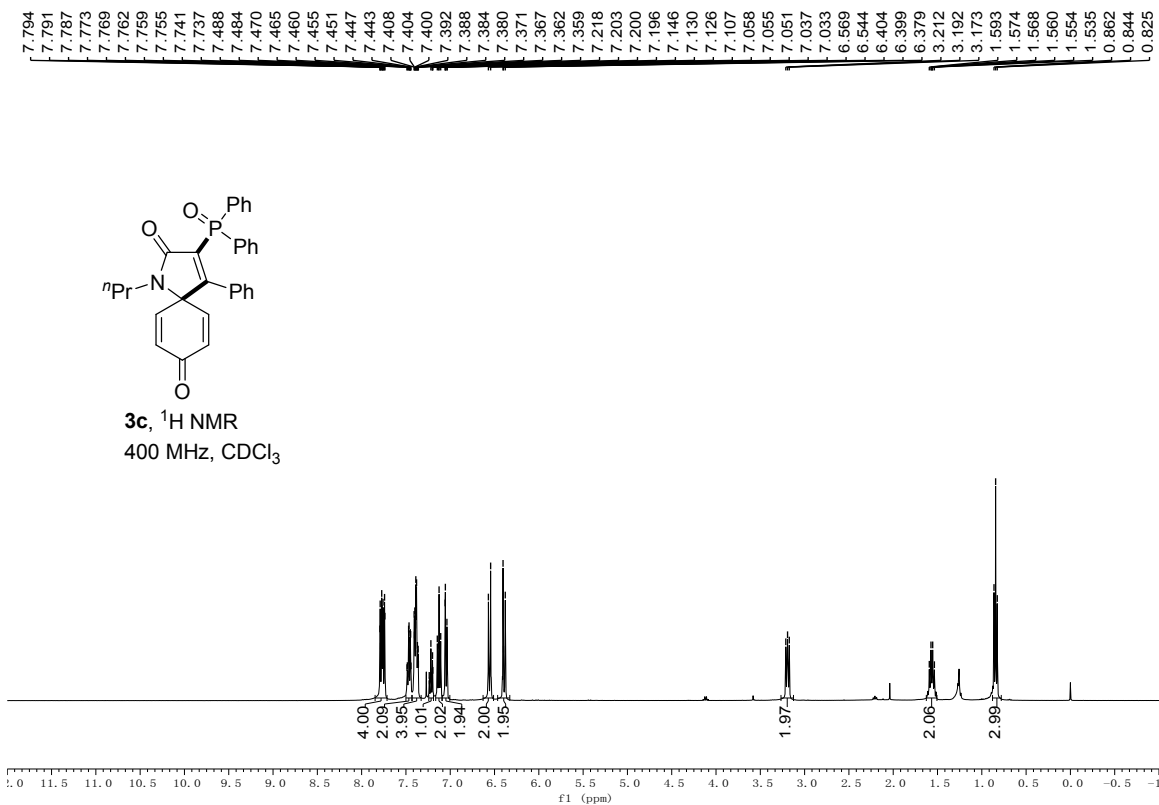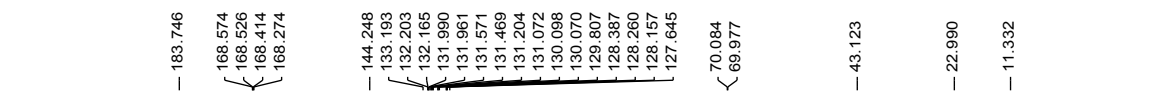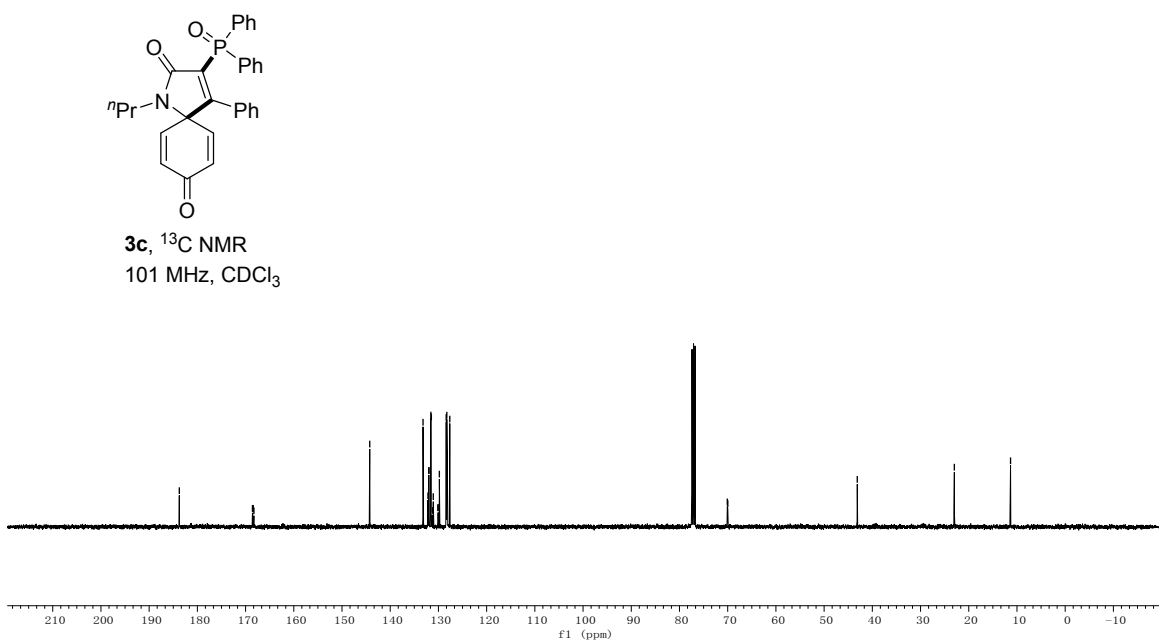

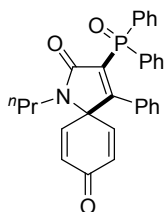

**3c**,  $^{31}\text{P}$  NMR  
162 MHz,  $\text{CDCl}_3$

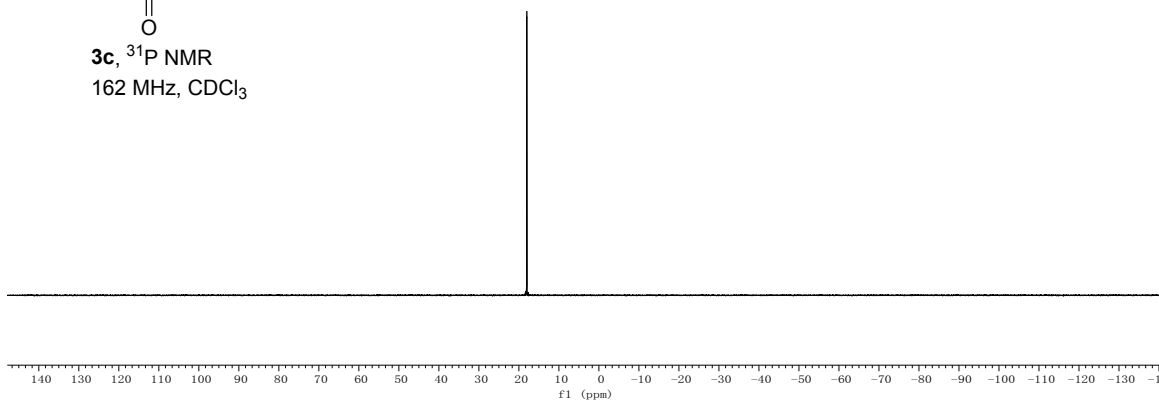

7.791  
7.773  
7.769  
7.769  
7.759  
7.741  
7.737  
7.486  
7.482  
7.468  
7.464  
7.453  
7.449  
7.445  
7.442  
7.407  
7.399  
7.391  
7.387  
7.380  
7.370  
7.366  
7.361  
7.358  
7.216  
7.201  
7.198  
7.194  
7.144  
7.128  
7.124  
7.106  
7.053  
7.035  
7.031  
6.565  
6.539  
6.406  
6.381  
3.244  
3.228  
3.223  
3.204  
1.540  
1.533  
1.526  
1.519  
1.510  
1.504  
1.500  
1.494  
1.282  
1.272  
1.263  
1.254  
1.244  
1.236  
1.225  
0.880  
0.861  
0.843

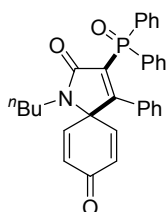

**3d**,  $^1\text{H}$  NMR  
400 MHz,  $\text{CDCl}_3$

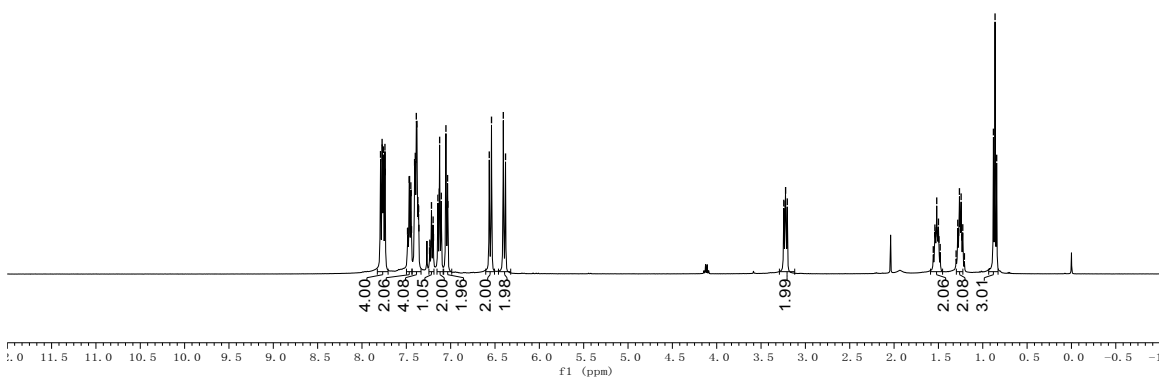

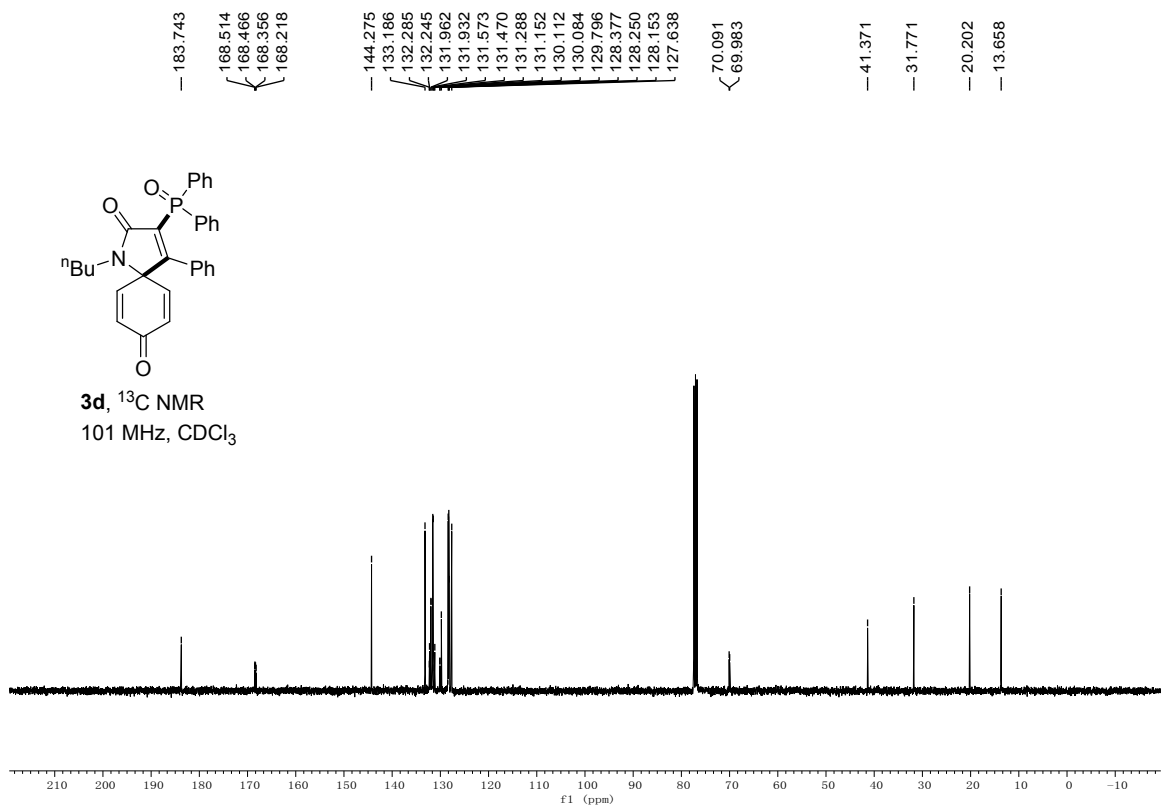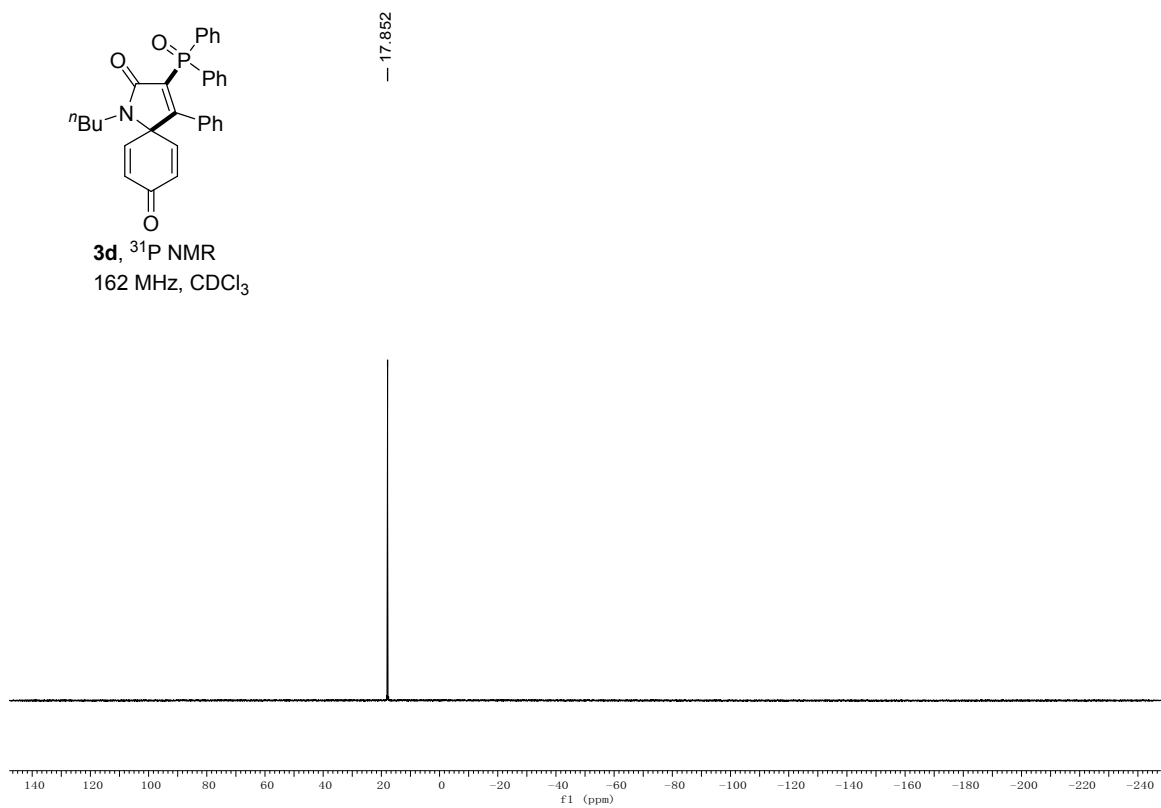

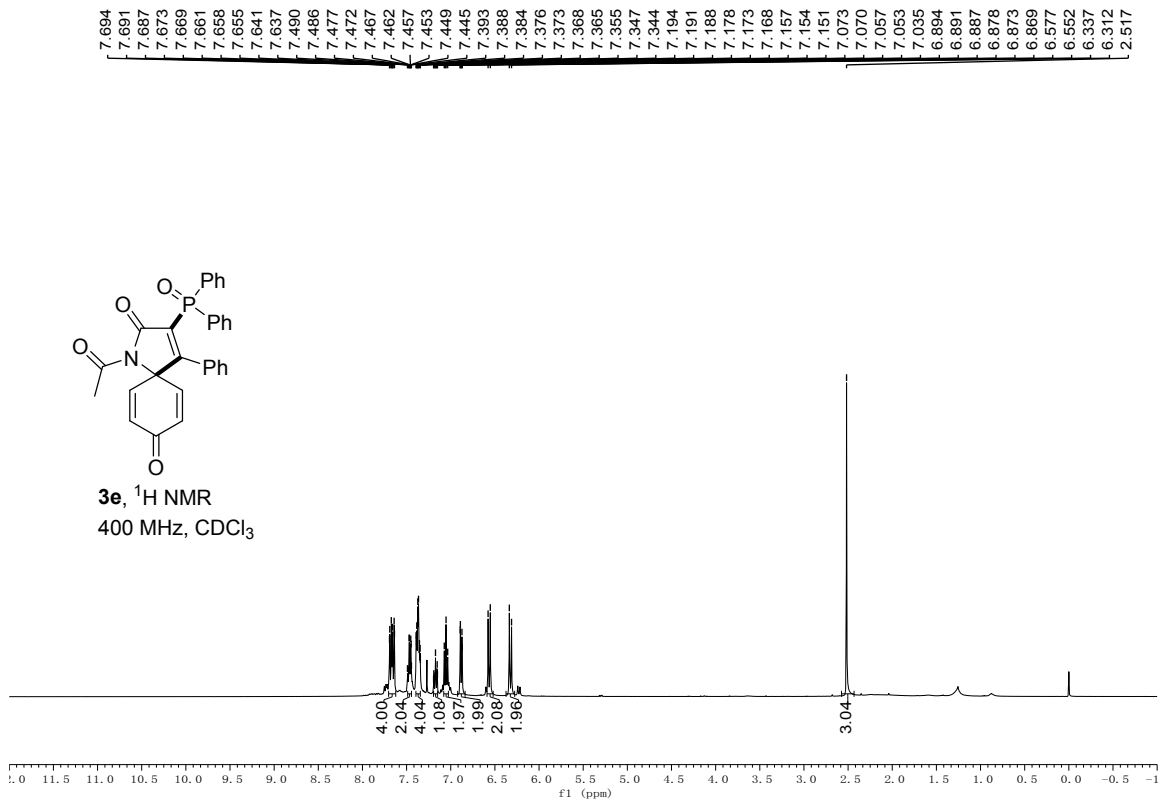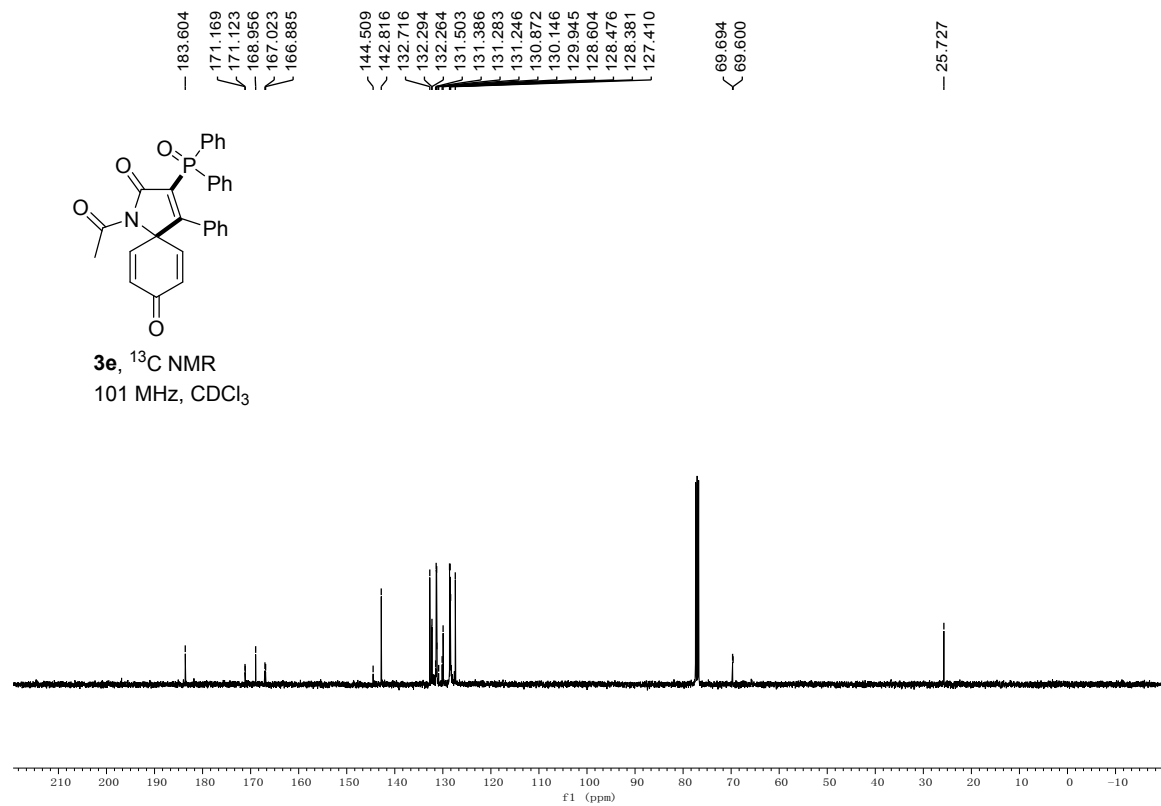



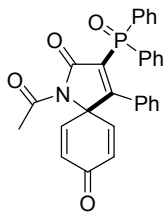

**3e**,  $^{31}\text{P}$  NMR  
162 MHz,  $\text{CDCl}_3$

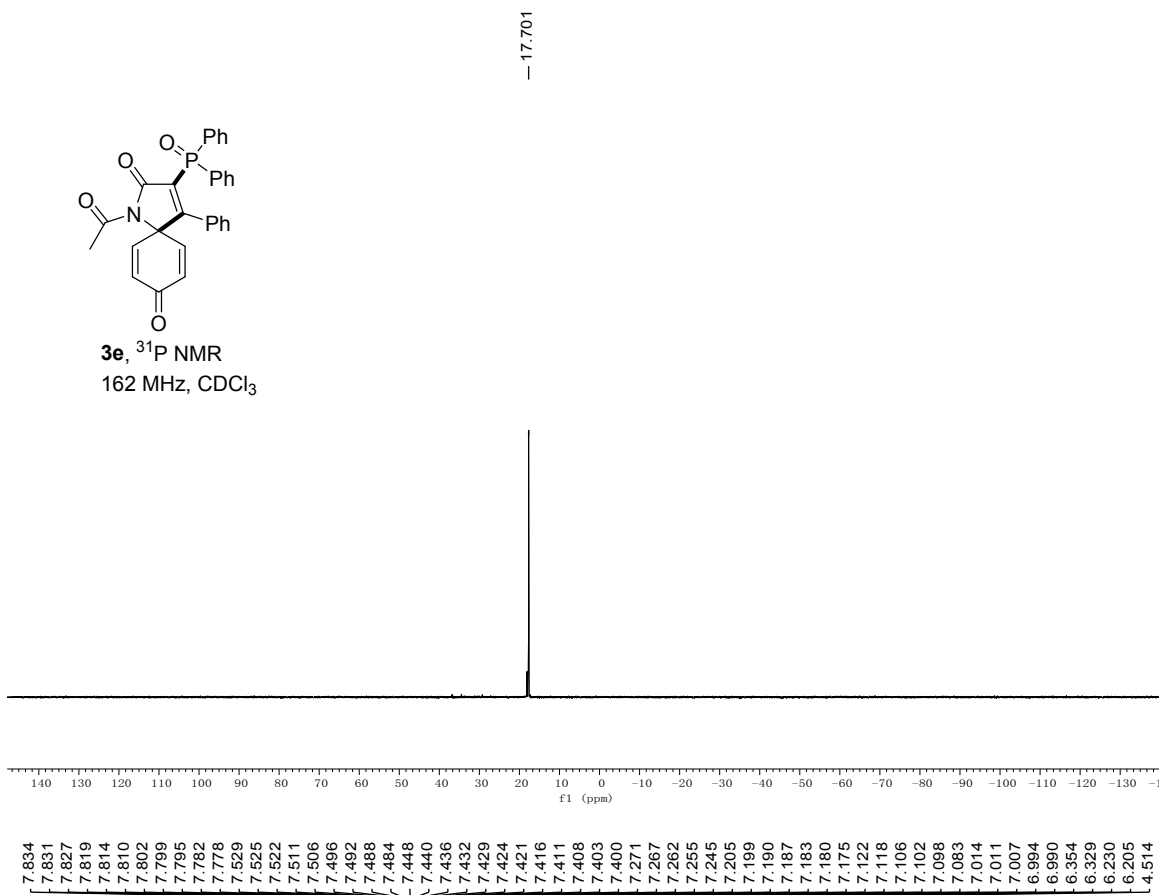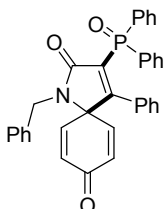

**3f**,  $^1\text{H}$  NMR  
400 MHz,  $\text{CDCl}_3$

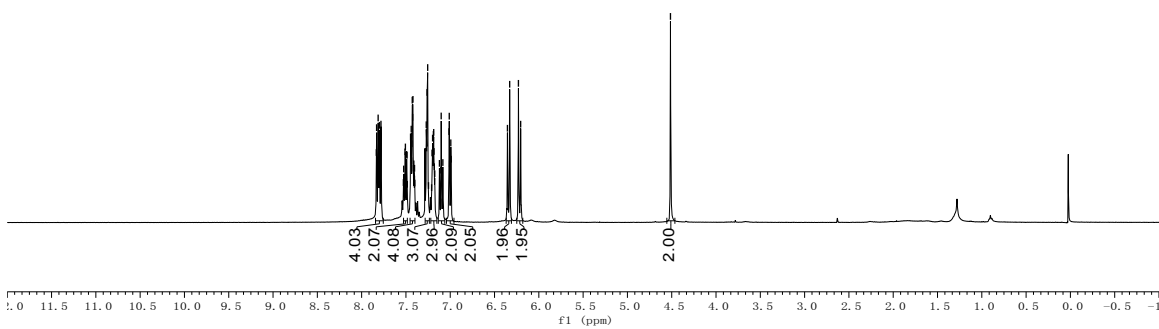

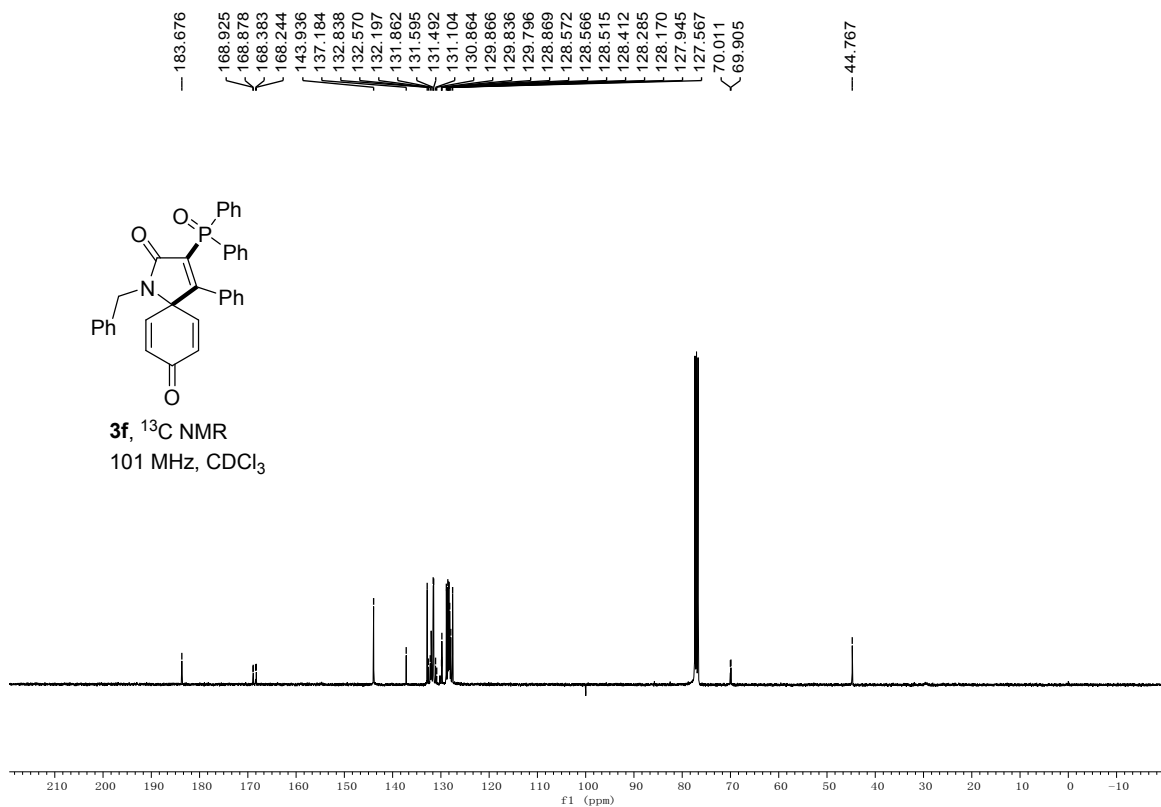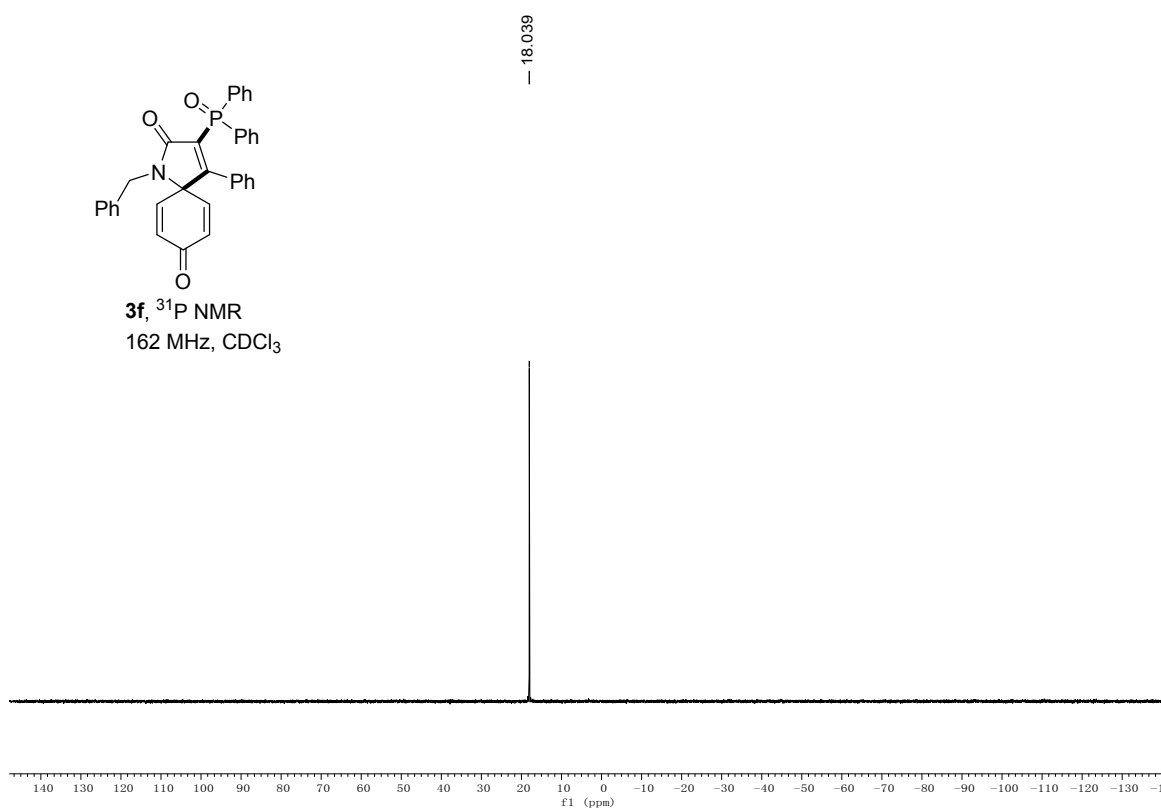

7.818  
7.815  
7.798  
7.794  
7.786  
7.783  
7.779  
7.775  
7.766  
7.762  
7.757  
7.750  
7.746  
7.729  
7.725  
7.707  
7.702  
7.502  
7.488  
7.484  
7.480  
7.475  
7.461  
7.457  
7.444  
7.440  
7.436  
7.428  
7.425  
7.421  
7.417  
7.413  
7.407  
7.404  
7.399  
7.396  
7.393  
7.388  
7.385  
7.265  
7.256  
7.237  
7.188  
7.184  
7.172  
7.168  
7.150  
7.148  
7.046  
7.044  
7.040  
7.026  
7.022  
6.994  
6.987  
6.538  
6.531  
6.498  
6.495  
6.474  
2.871

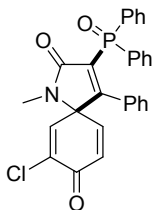

**3g**,  $^1\text{H}$  NMR  
400 MHz,  $\text{CDCl}_3$

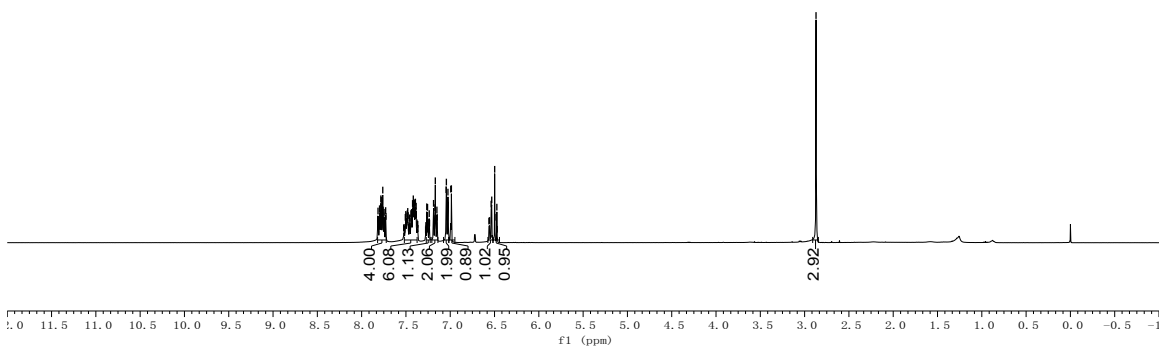

176.749  
167.955  
167.816  
167.793  
167.745  
144.404  
139.520  
137.037  
132.661  
132.387  
132.175  
132.147  
132.118  
131.978  
131.858  
131.637  
131.620  
131.534  
131.517  
131.400  
130.883  
130.762  
130.106  
129.669  
129.640  
128.491  
128.462  
128.363  
128.335  
128.036  
128.023  
127.880  
71.432  
71.323

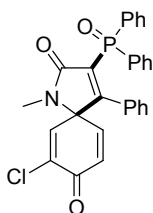

**3g**,  $^{13}\text{C}$  NMR  
101 MHz,  $\text{CDCl}_3$

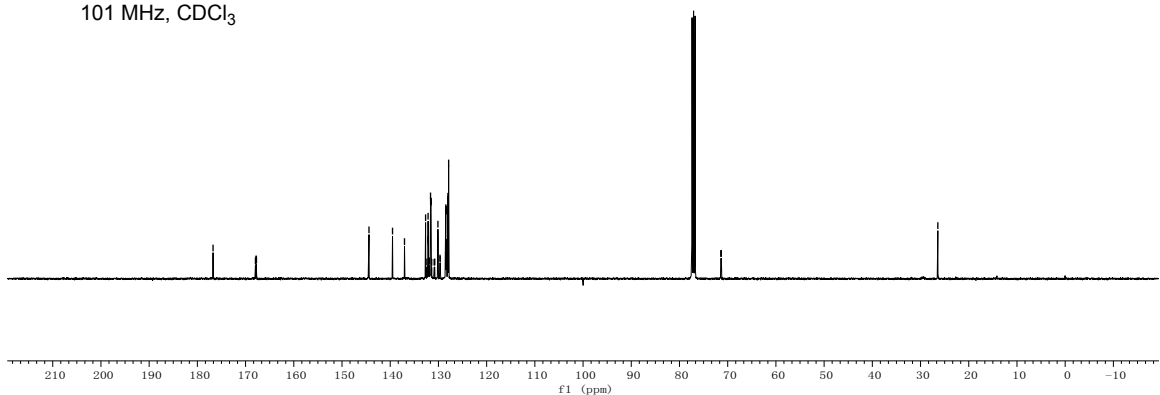

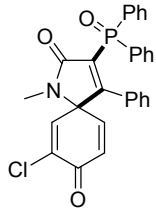

**3g**,  $^{31}\text{P}$  NMR  
162 MHz,  $\text{CDCl}_3$

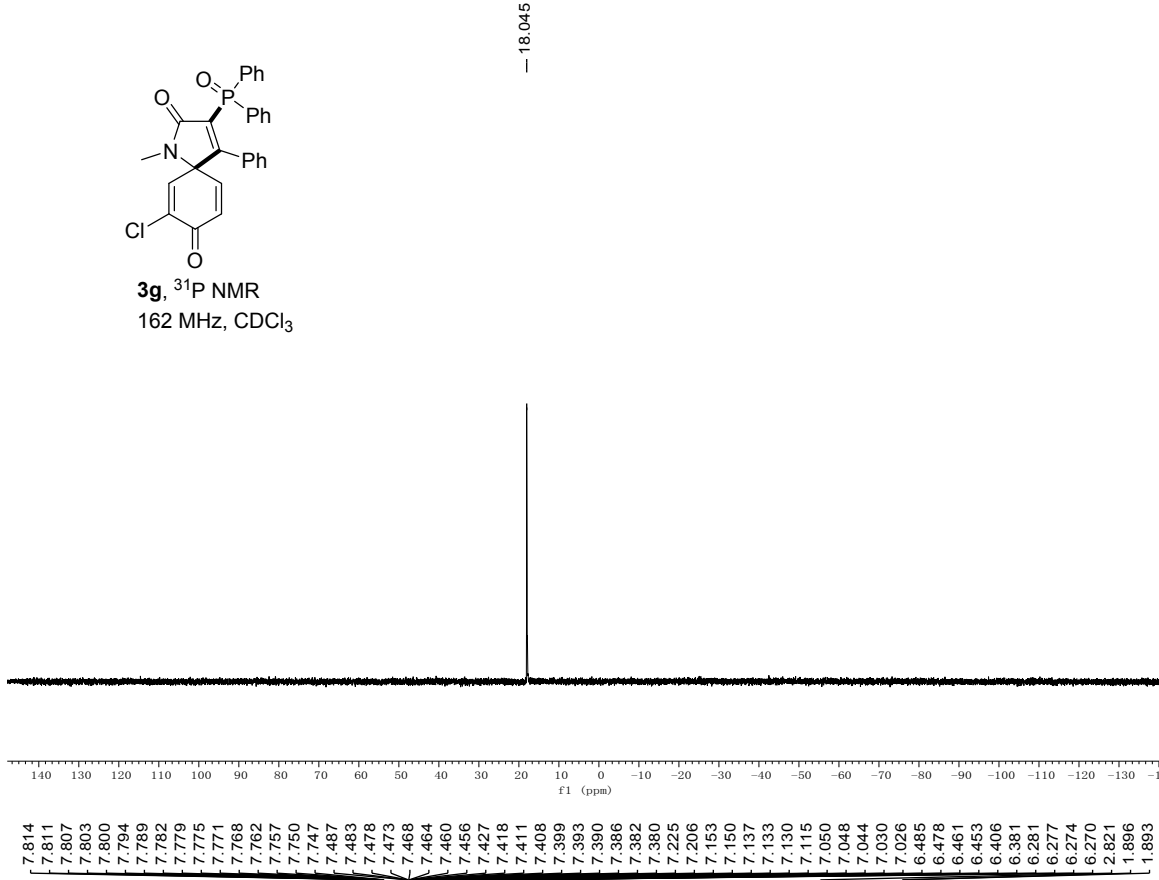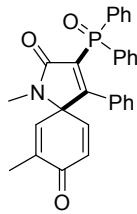

**3h**,  $^1\text{H}$  NMR  
400 MHz,  $\text{CDCl}_3$

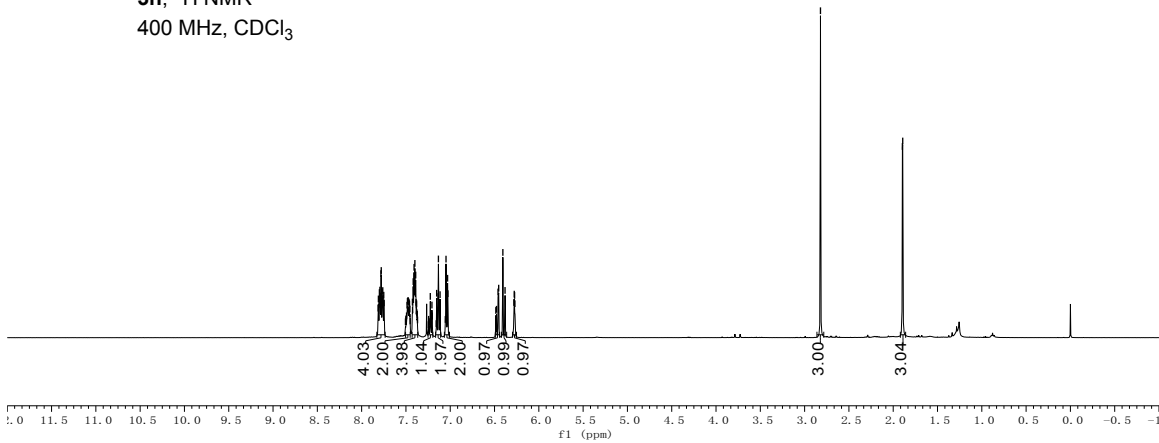

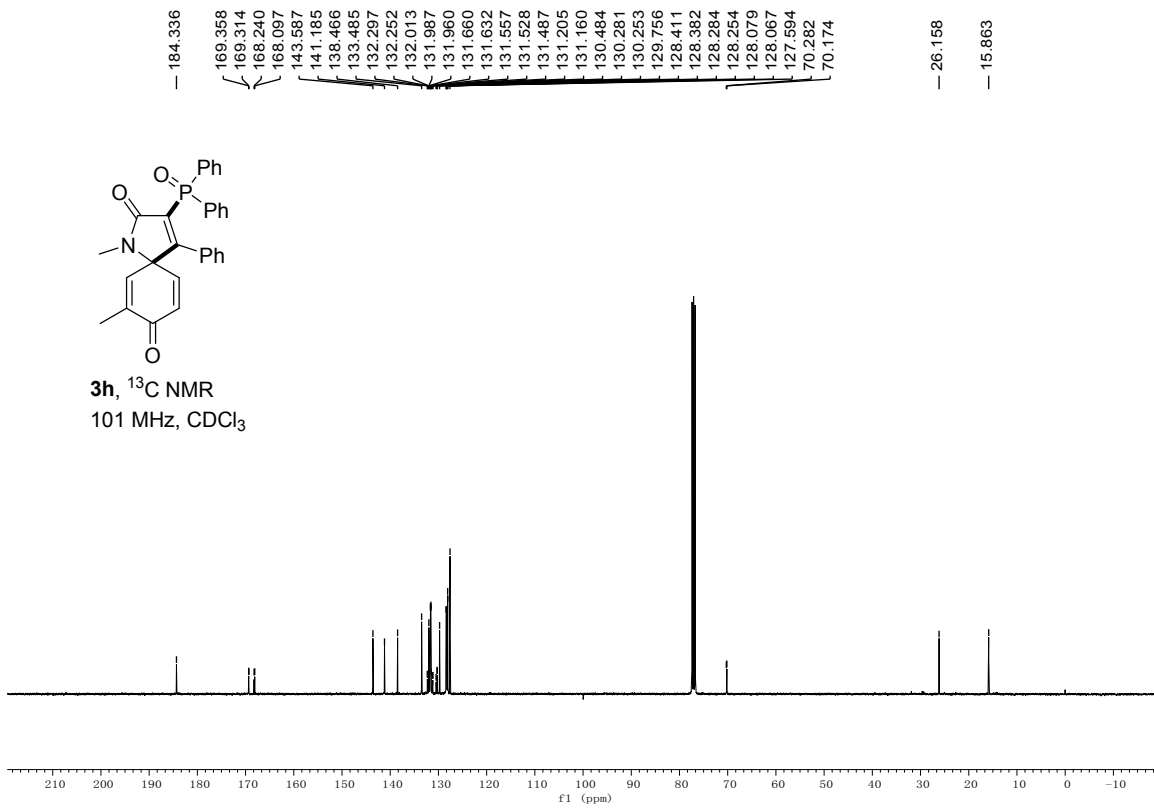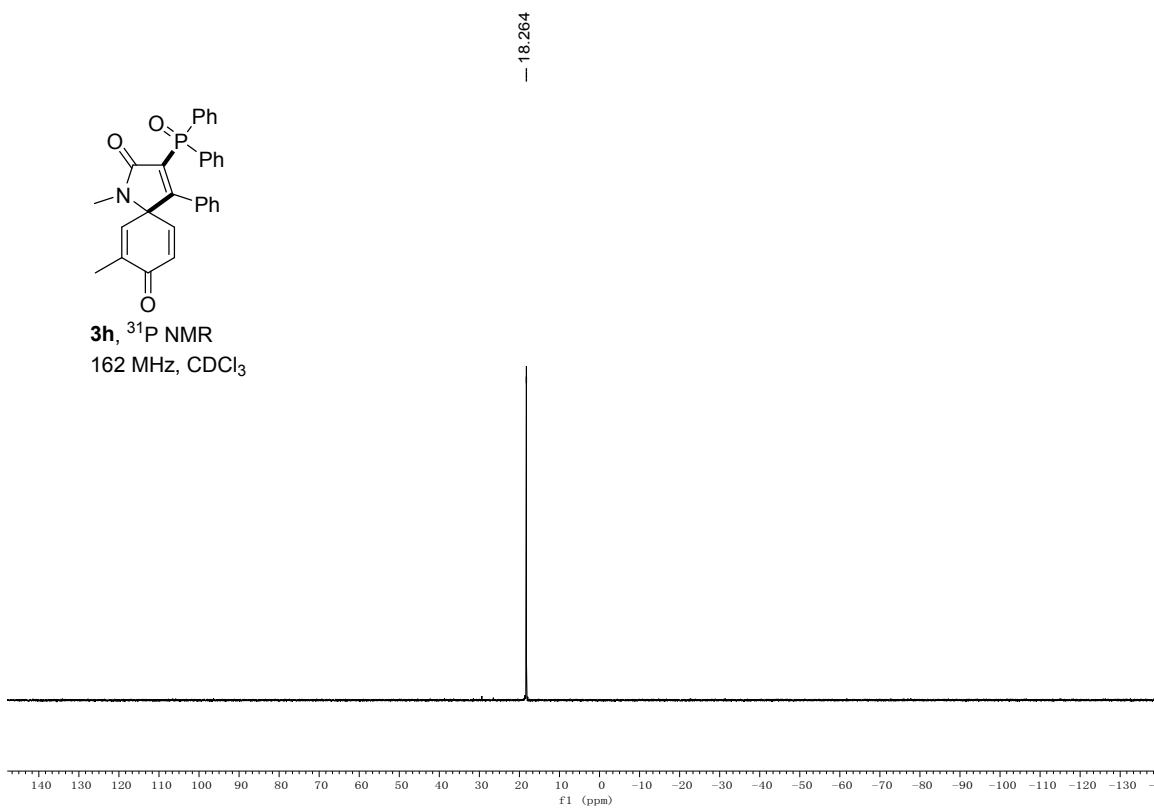

7.834  
7.831  
7.813  
7.809  
7.806  
7.802  
7.799  
7.795  
7.789  
7.785  
7.781  
7.777  
7.774  
7.770  
7.757  
7.753  
7.7505  
7.7501  
7.496  
7.491  
7.486  
7.482  
7.478  
7.474  
7.445  
7.437  
7.434  
7.430  
7.426  
7.422  
7.419  
7.416  
7.412  
7.408  
7.401  
7.398  
7.265  
7.239  
7.240  
7.178  
7.175  
7.162  
7.158  
7.139  
7.112  
7.109  
7.105  
7.104  
7.091  
7.087  
6.491  
6.466  
6.454  
6.450  
6.322  
6.318  
6.315  
2.741  
1.802  
1.799

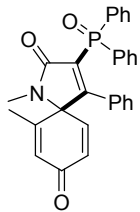

**3i**,  $^1\text{H NMR}$   
400 MHz,  $\text{CDCl}_3$

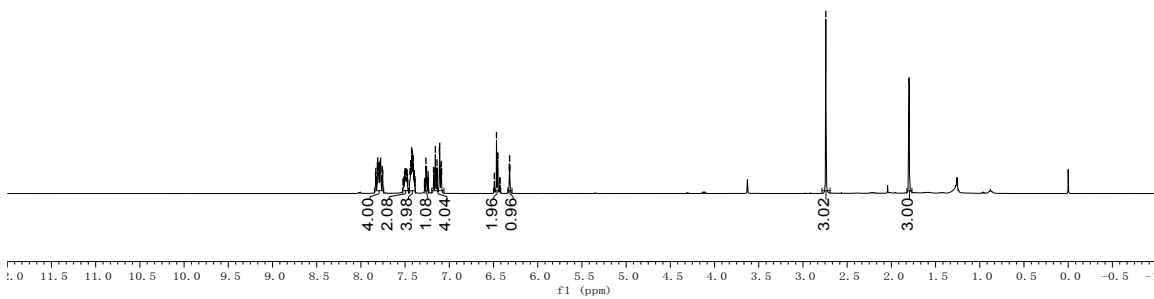

184.291  
169.143  
169.099  
168.778  
168.632  
151.832  
143.899  
133.268  
132.548  
132.420  
132.401  
132.101  
132.070  
131.648  
131.544  
131.487  
131.423  
131.384  
131.306  
131.010  
130.290  
130.290  
129.946  
129.918  
128.483  
128.447  
128.356  
128.320  
128.047  
127.862  
71.912  
71.806  
25.767  
17.847

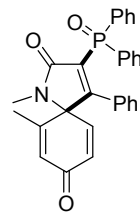

**3i**,  $^{13}\text{C NMR}$   
101 MHz,  $\text{CDCl}_3$

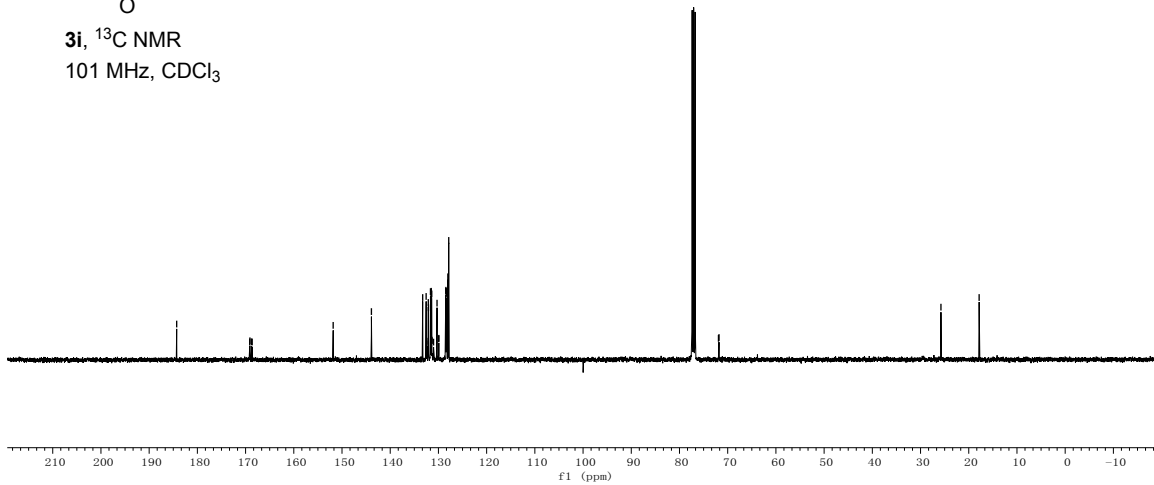

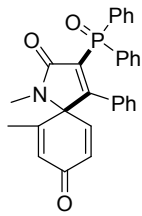

**3i**,  $^{31}\text{P}$  NMR  
162 MHz,  $\text{CDCl}_3$

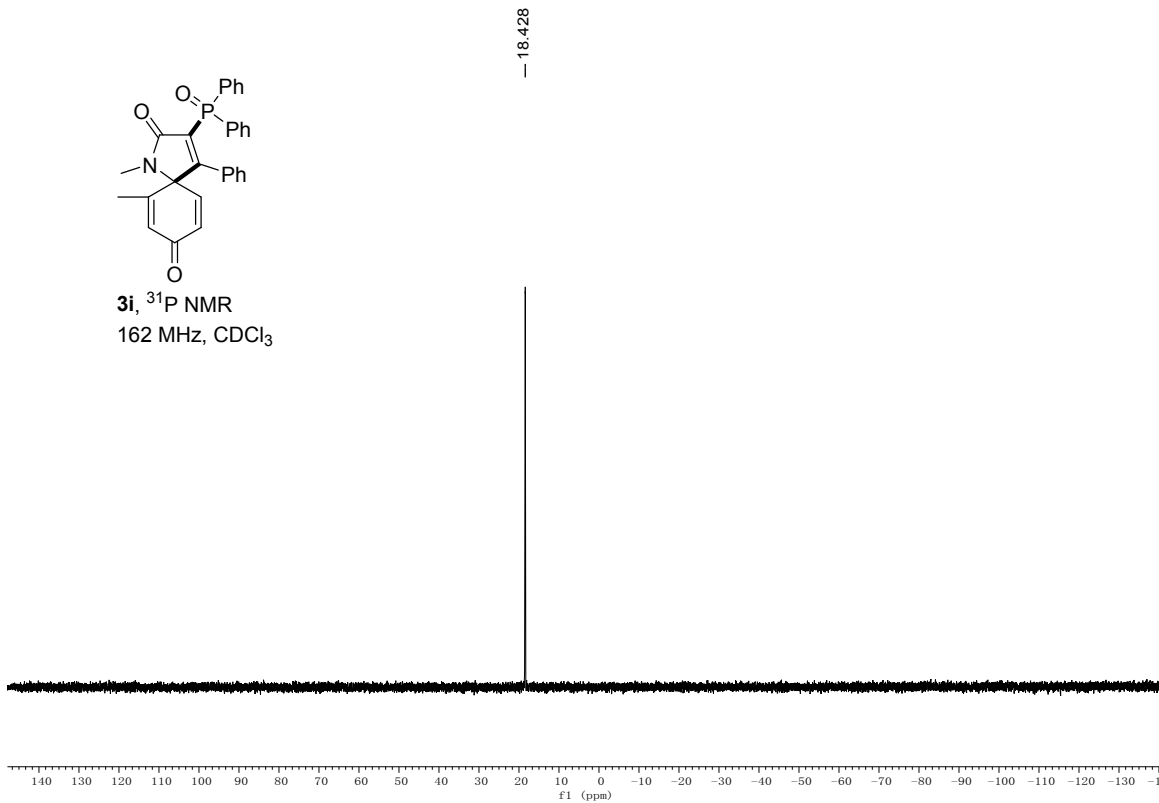

7.824  
7.807  
7.803  
7.792  
7.775  
7.771  
7.758  
7.514  
7.500  
7.496  
7.482  
7.477  
7.436  
7.428  
7.417  
7.409  
7.398  
7.391  
7.025  
7.005  
6.966  
6.946  
6.533  
6.509  
6.465  
6.440

2.835

2.257

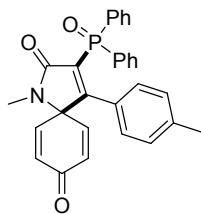

**3j**,  $^1\text{H}$  NMR  
400 MHz,  $\text{CDCl}_3$

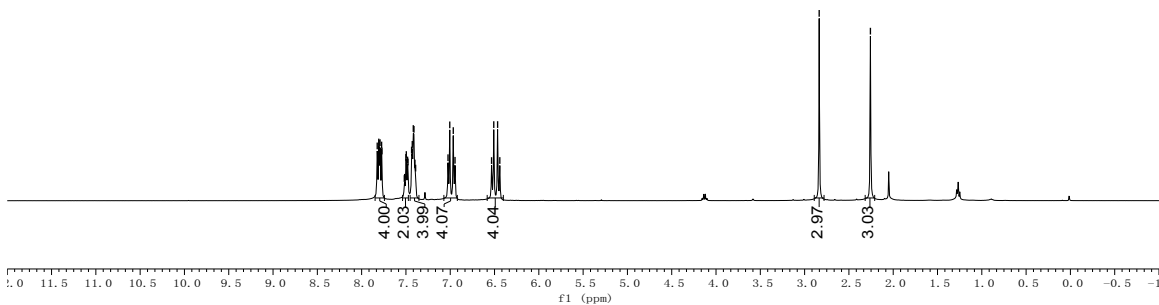

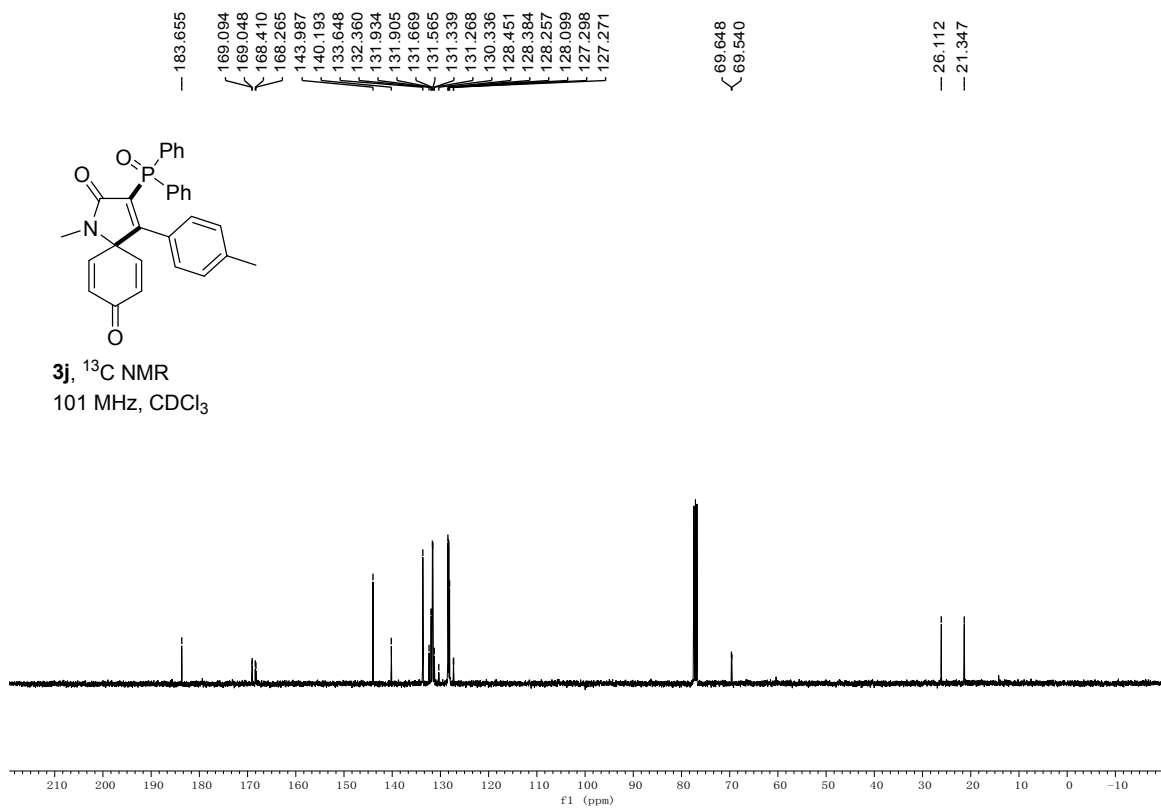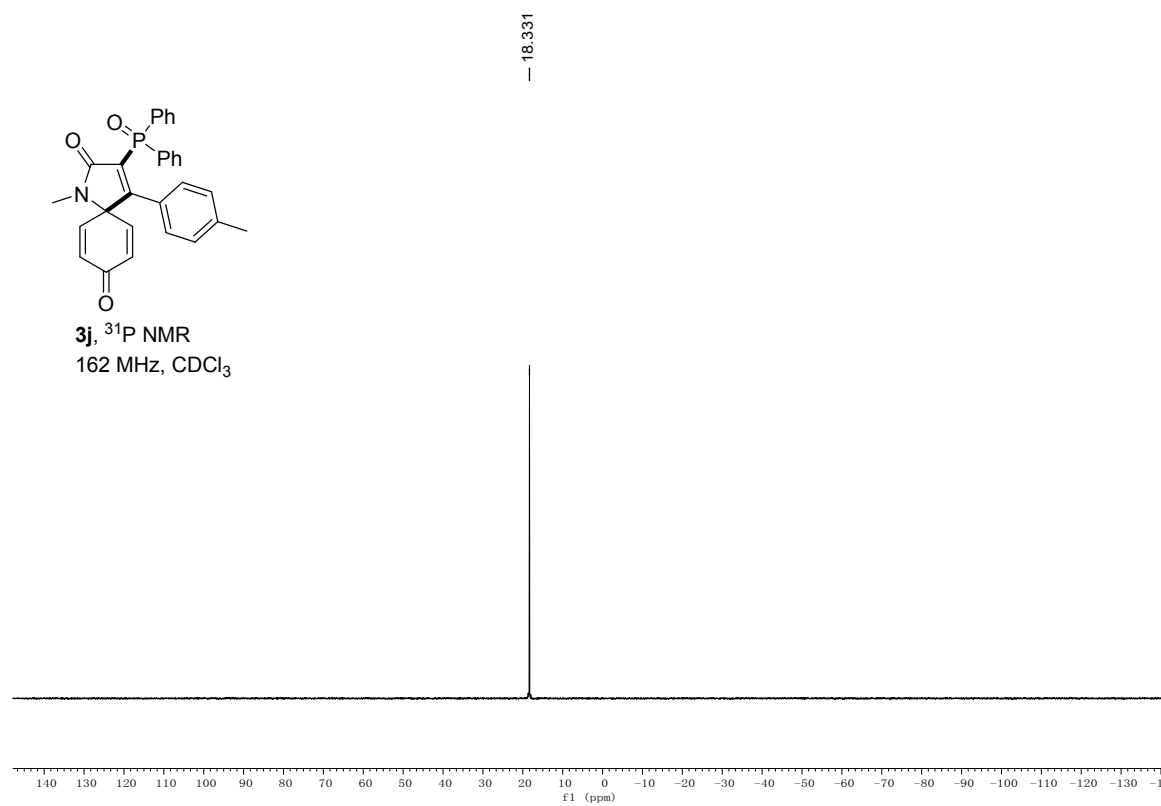



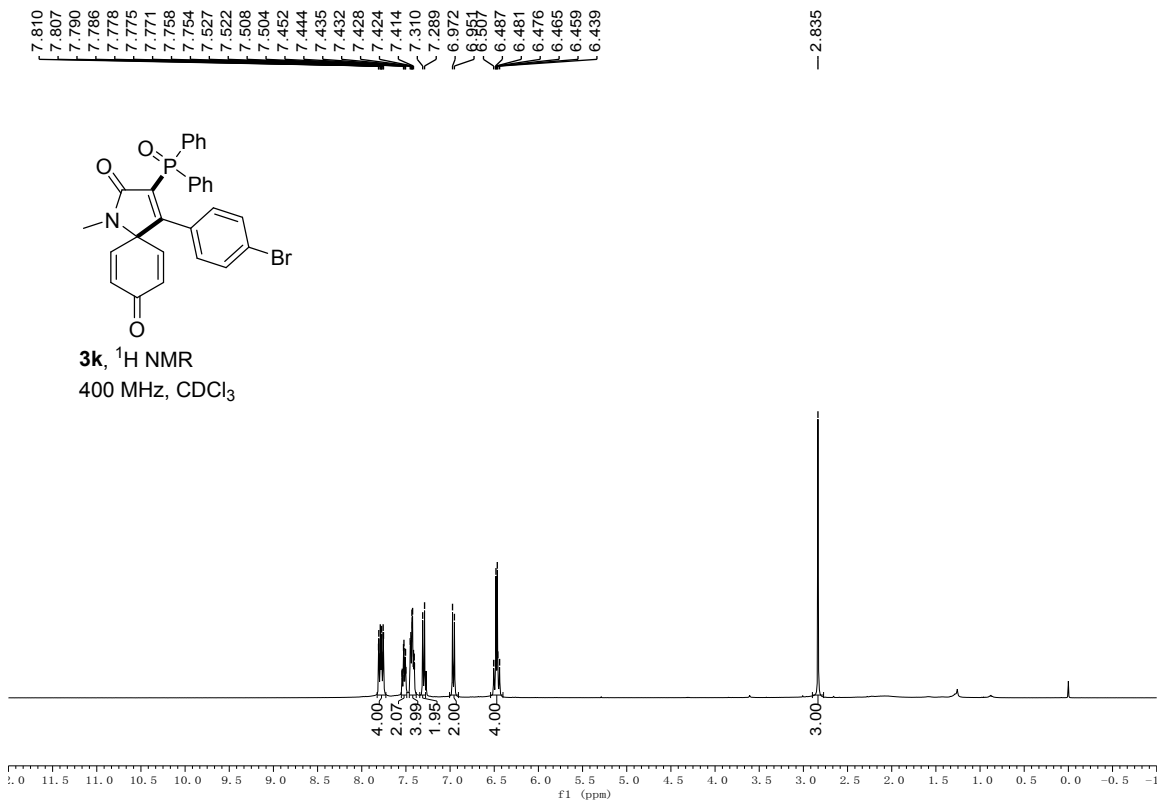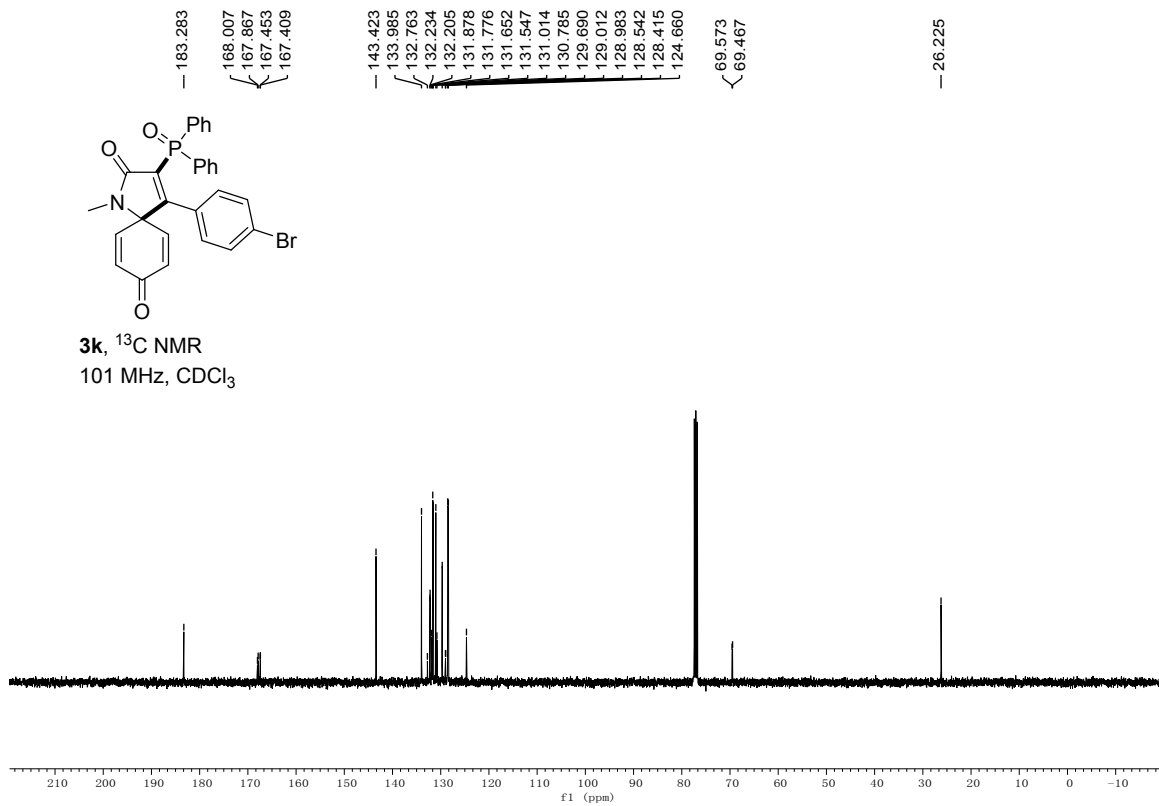

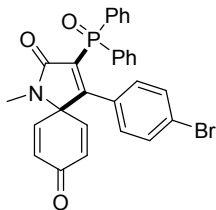

**3k**,  $^{31}\text{P}$  NMR  
162 MHz,  $\text{CDCl}_3$

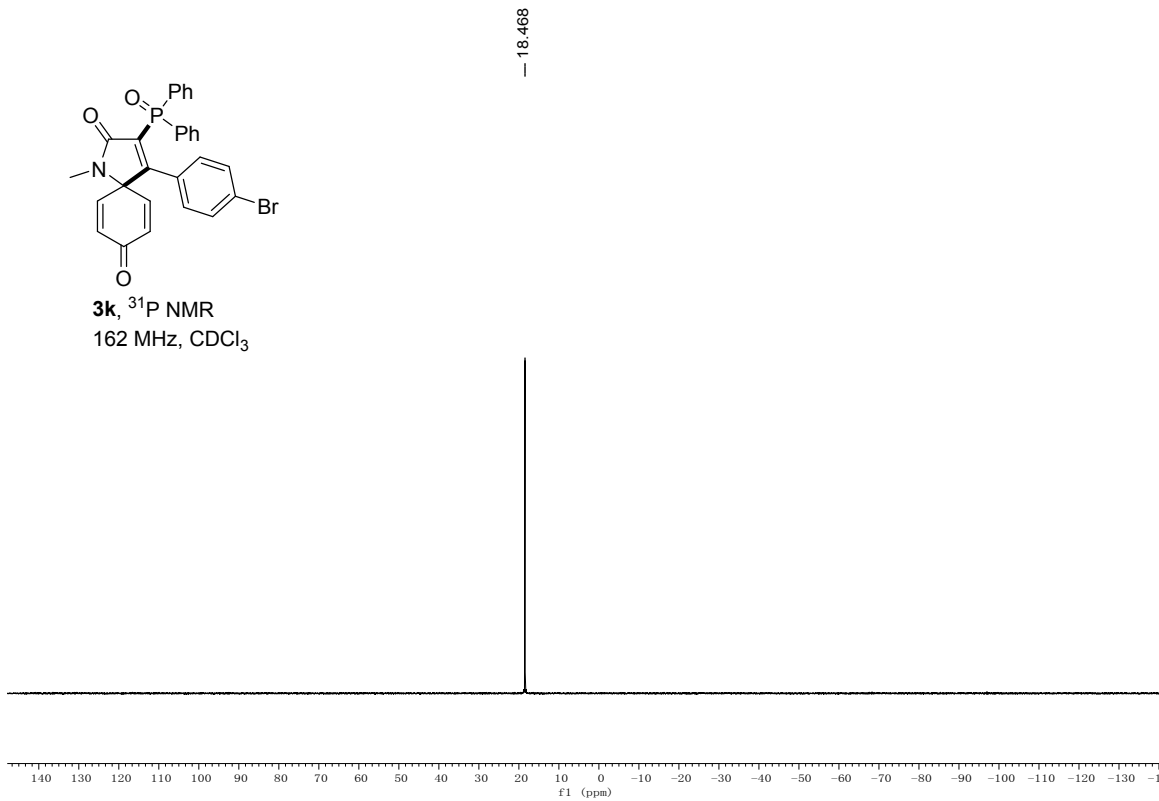

7.816  
7.813  
7.810  
7.796  
7.792  
7.785  
7.781  
7.778  
7.764  
7.760  
7.754  
7.499  
7.485  
7.481  
7.443  
7.440  
7.436  
7.428  
7.424  
7.420  
7.416  
7.406  
7.398  
7.267  
6.663  
6.647  
6.643  
6.590  
6.570  
6.560  
6.556  
6.514  
6.511  
6.505  
6.493  
6.486  
6.481  
6.474  
6.462  
6.455  
6.453  
5.904  
2.816

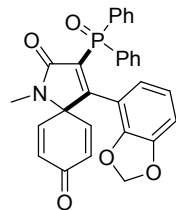

**3l**,  $^1\text{H}$  NMR  
400 MHz,  $\text{CDCl}_3$

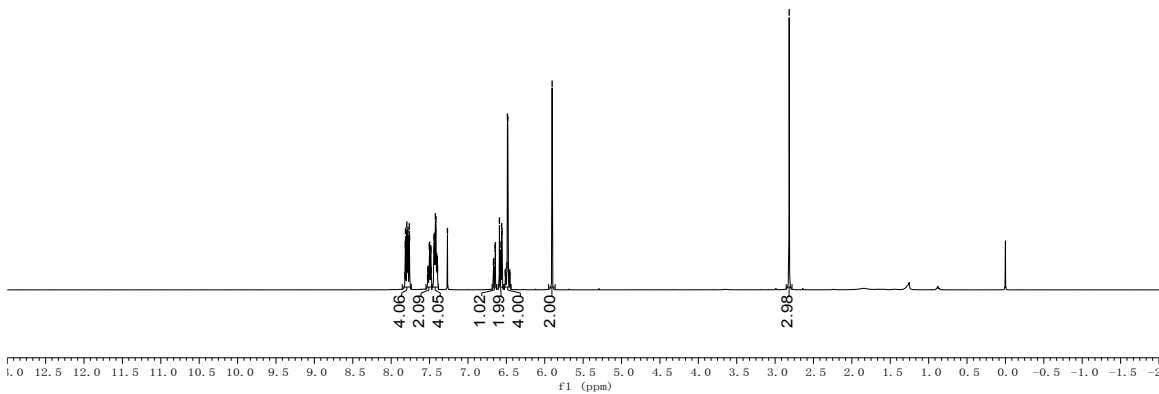

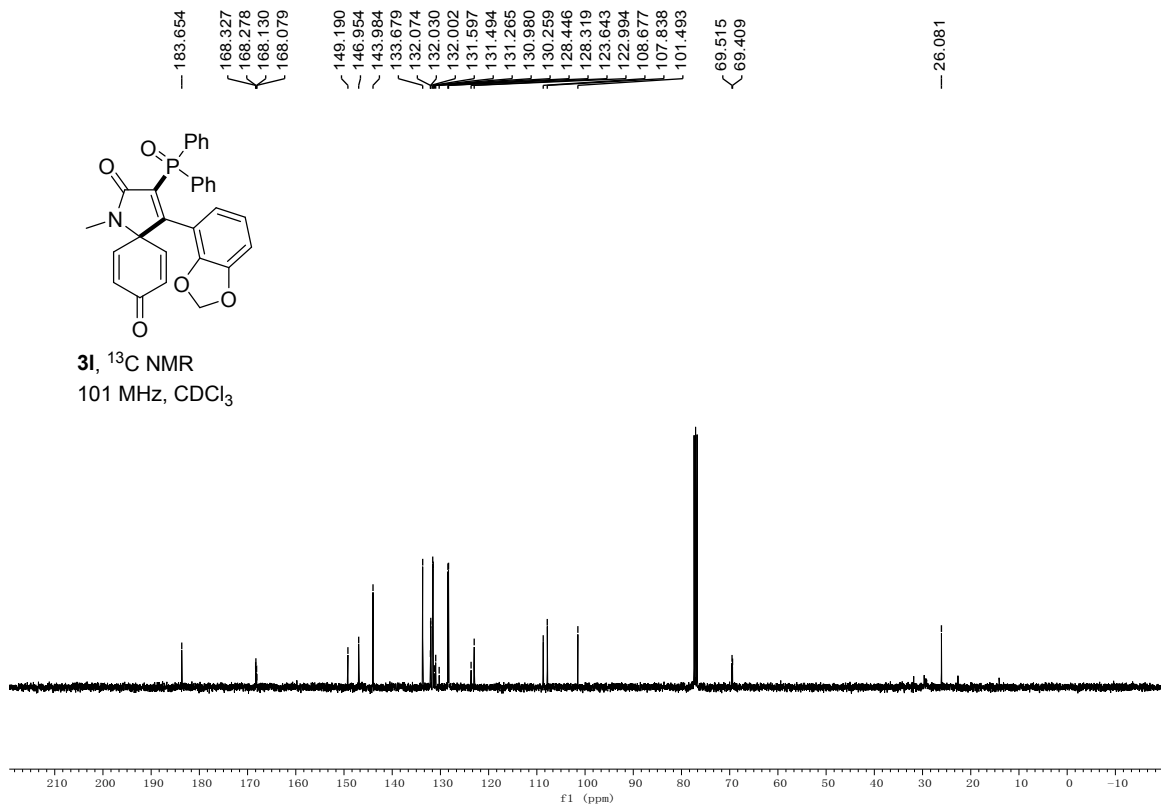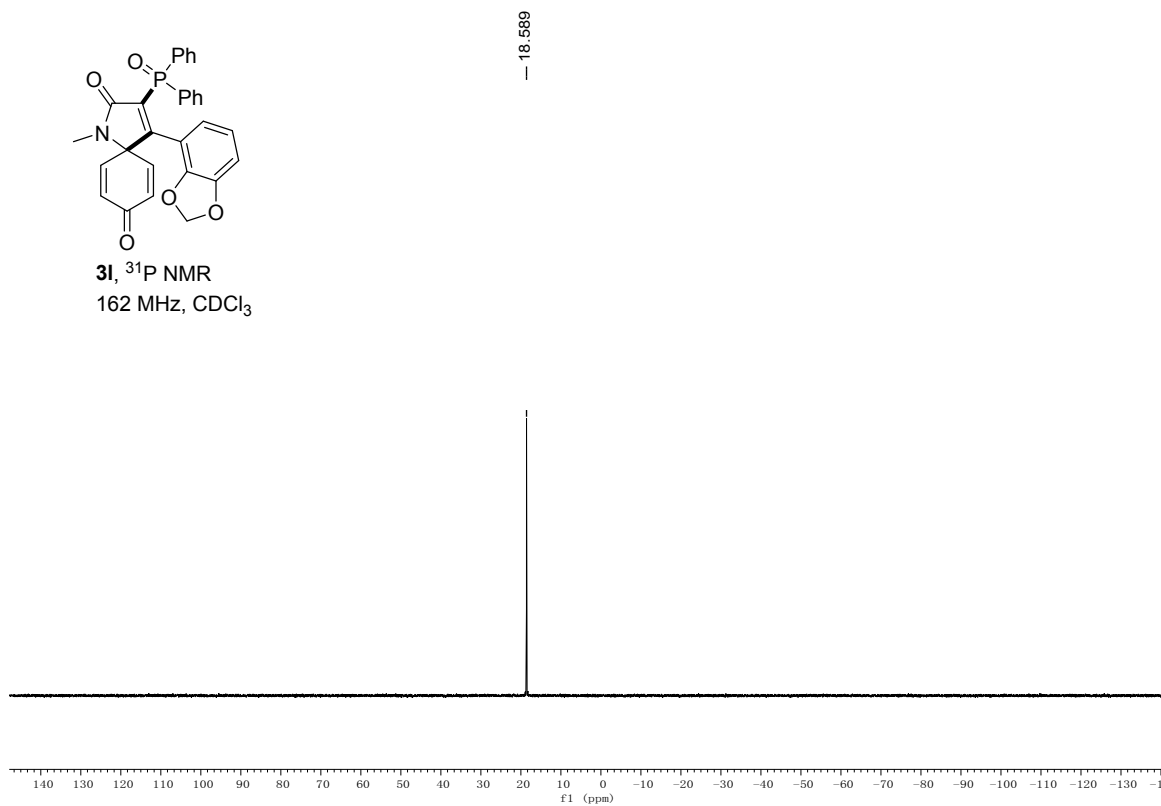

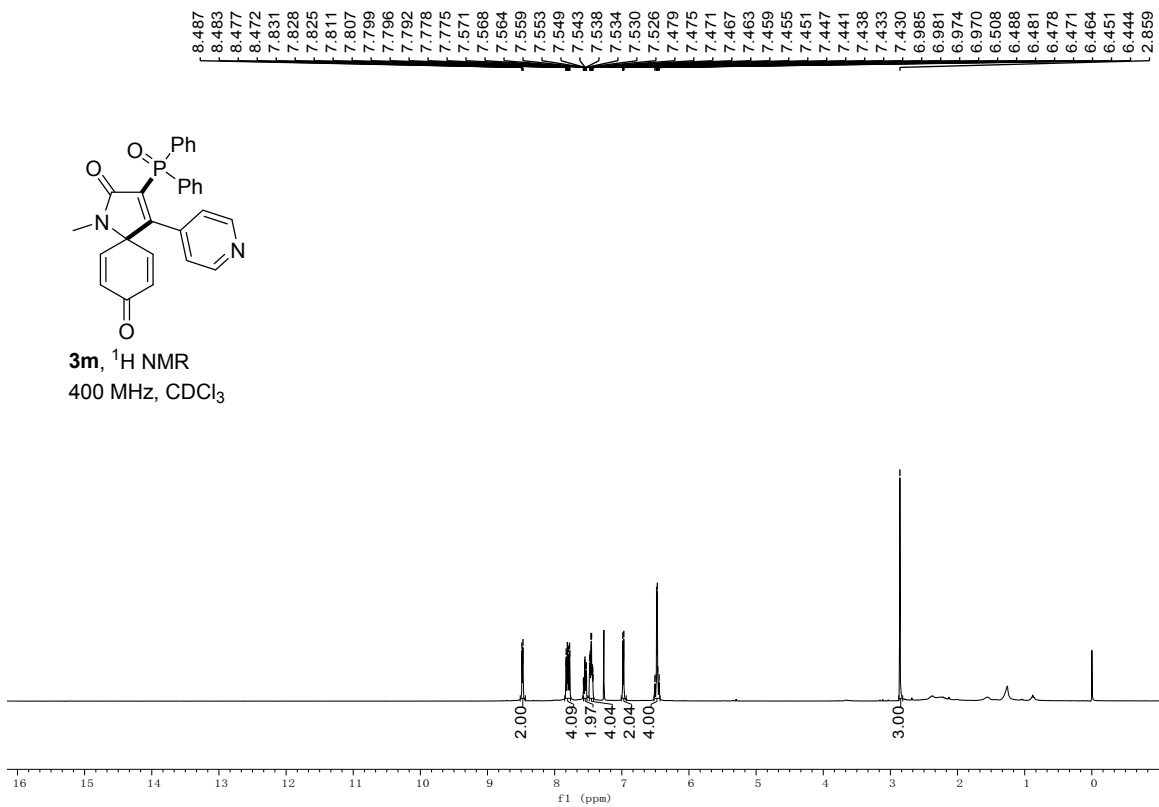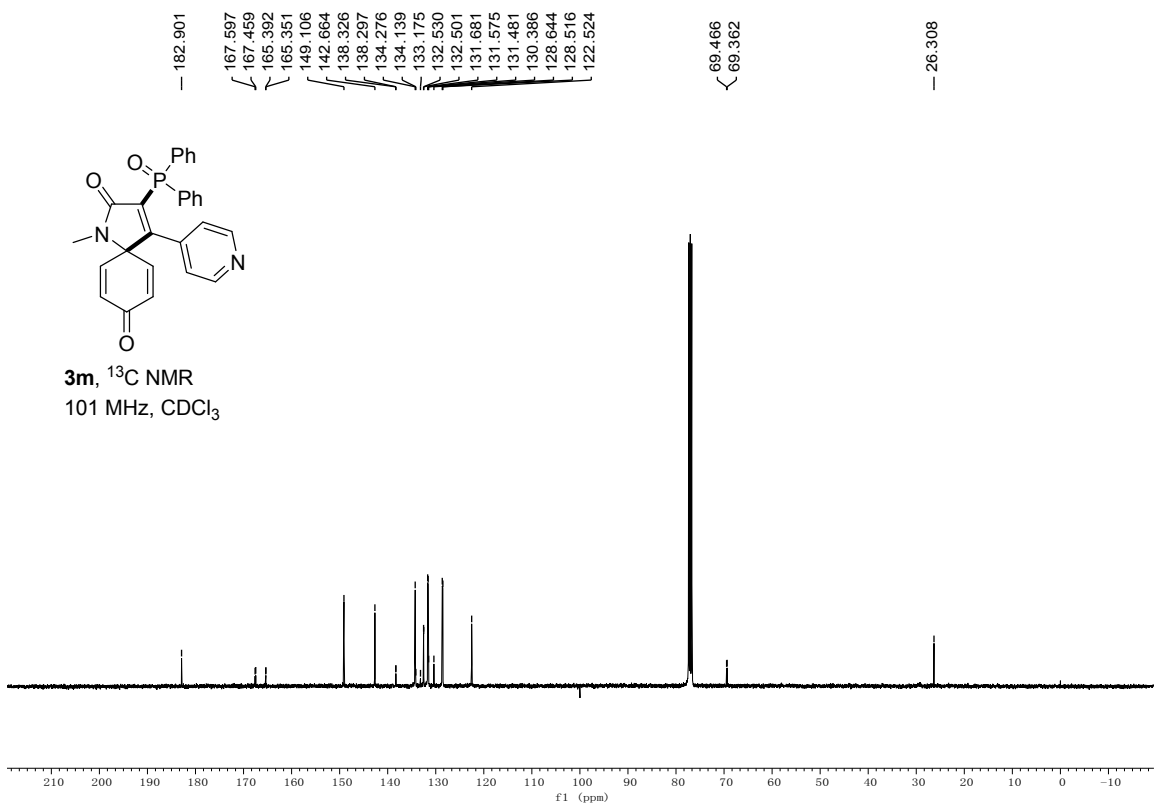

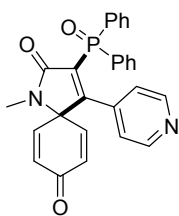

**3m**,  $^{31}\text{P}$  NMR  
162 MHz,  $\text{CDCl}_3$

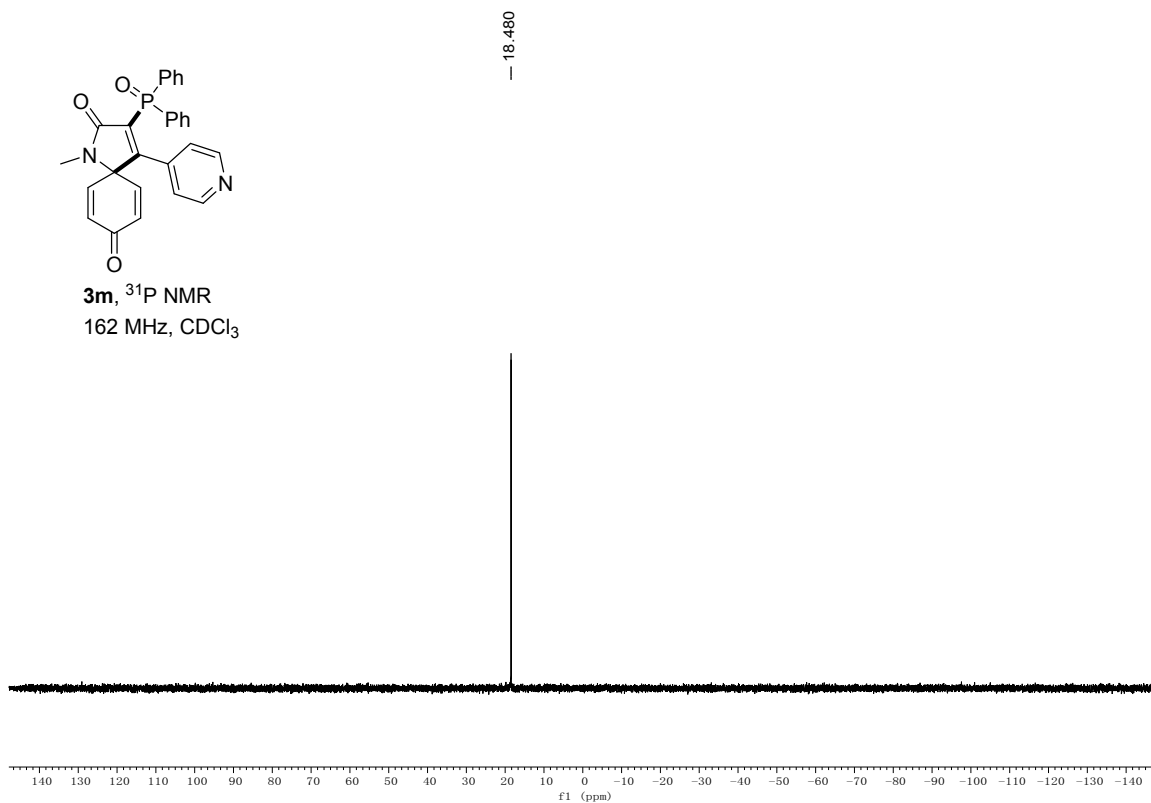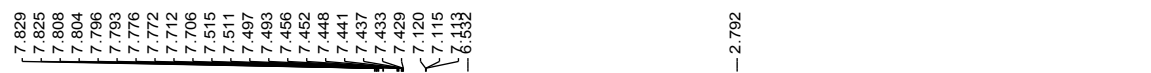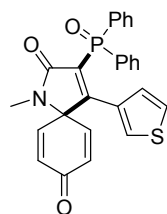

**3n**,  $^1\text{H}$  NMR  
400 MHz,  $\text{CDCl}_3$

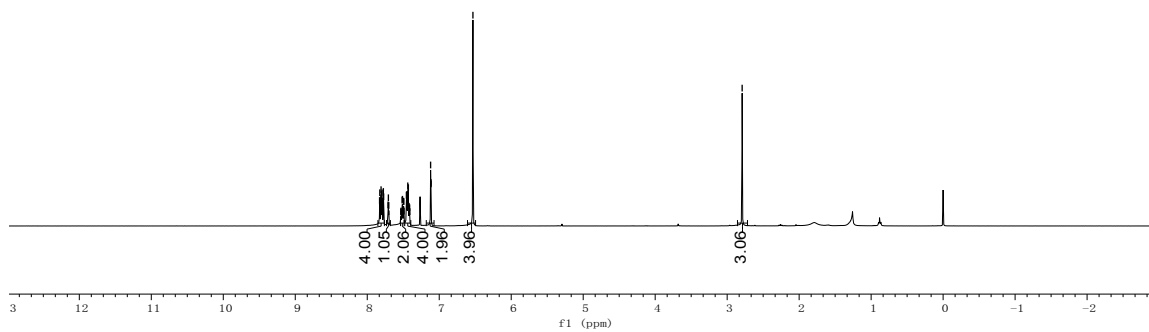

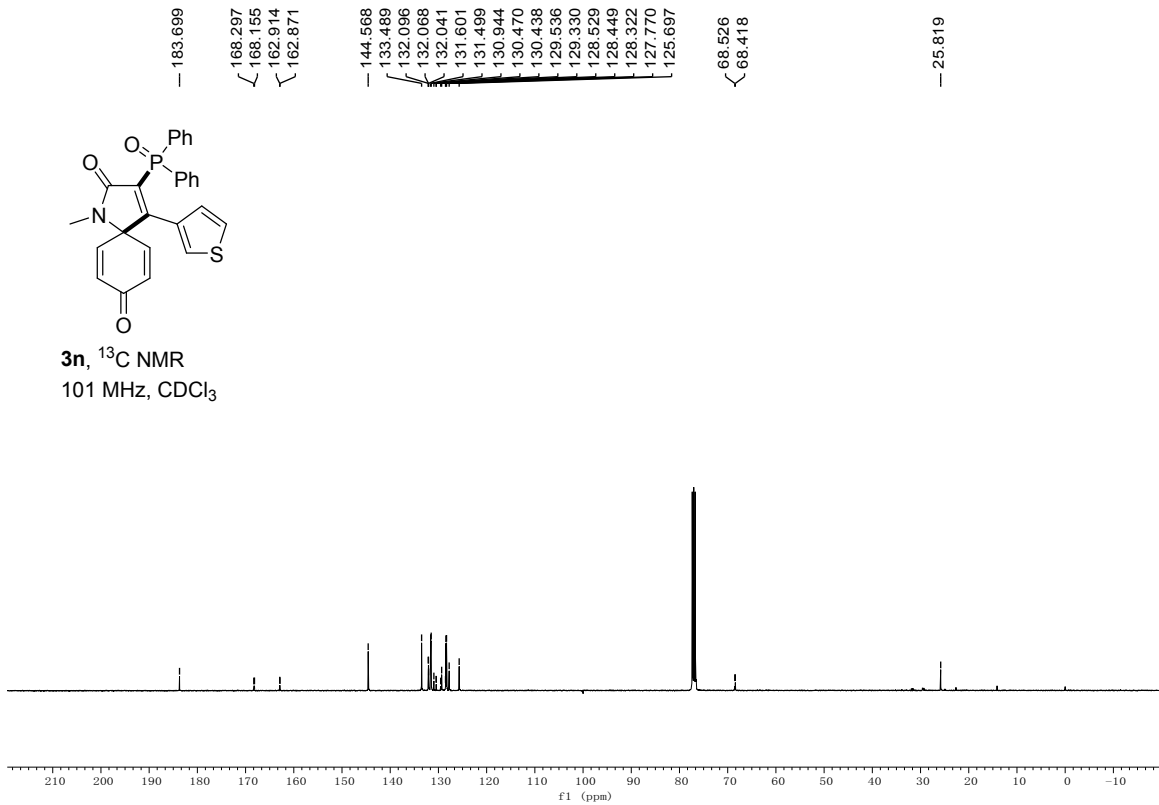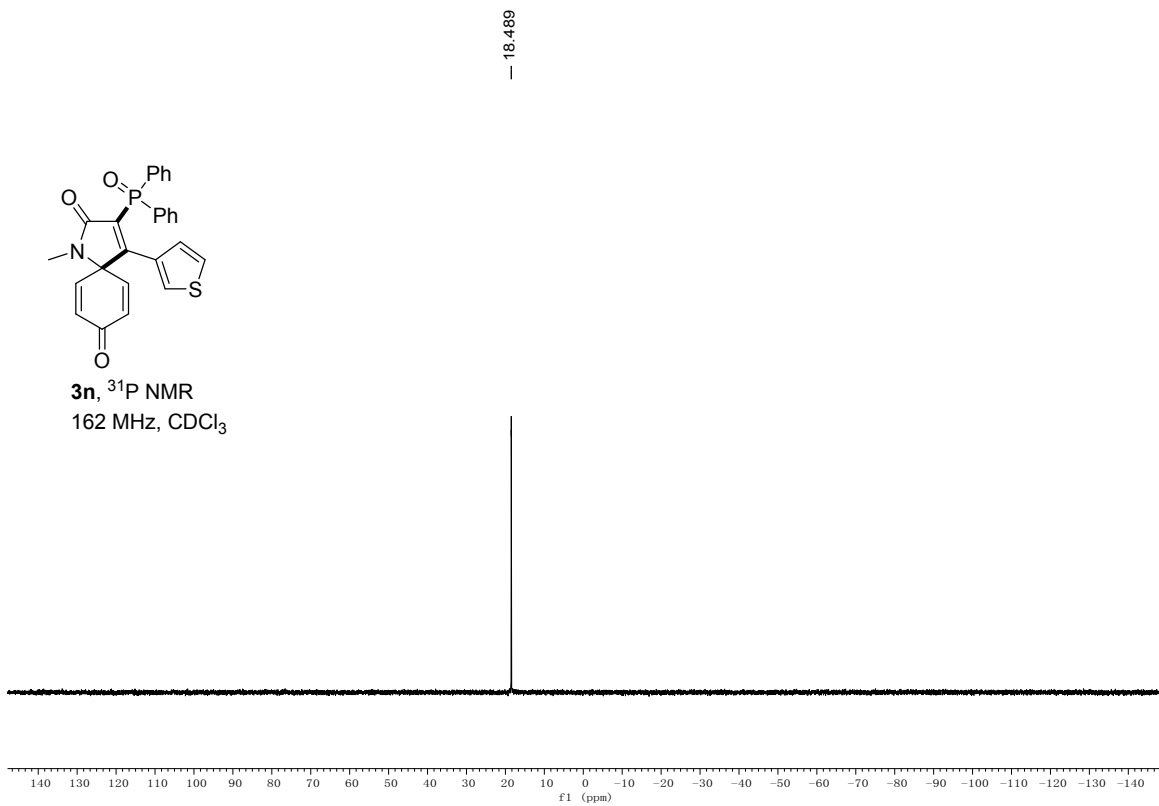

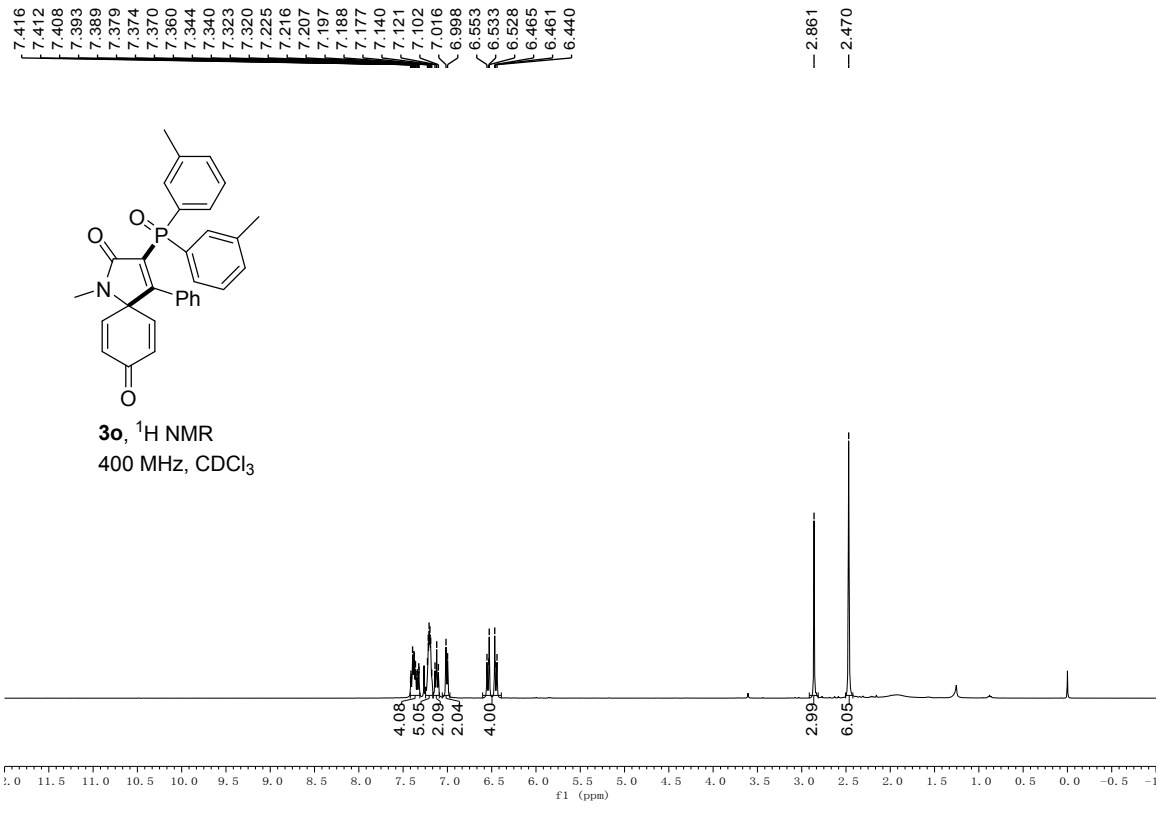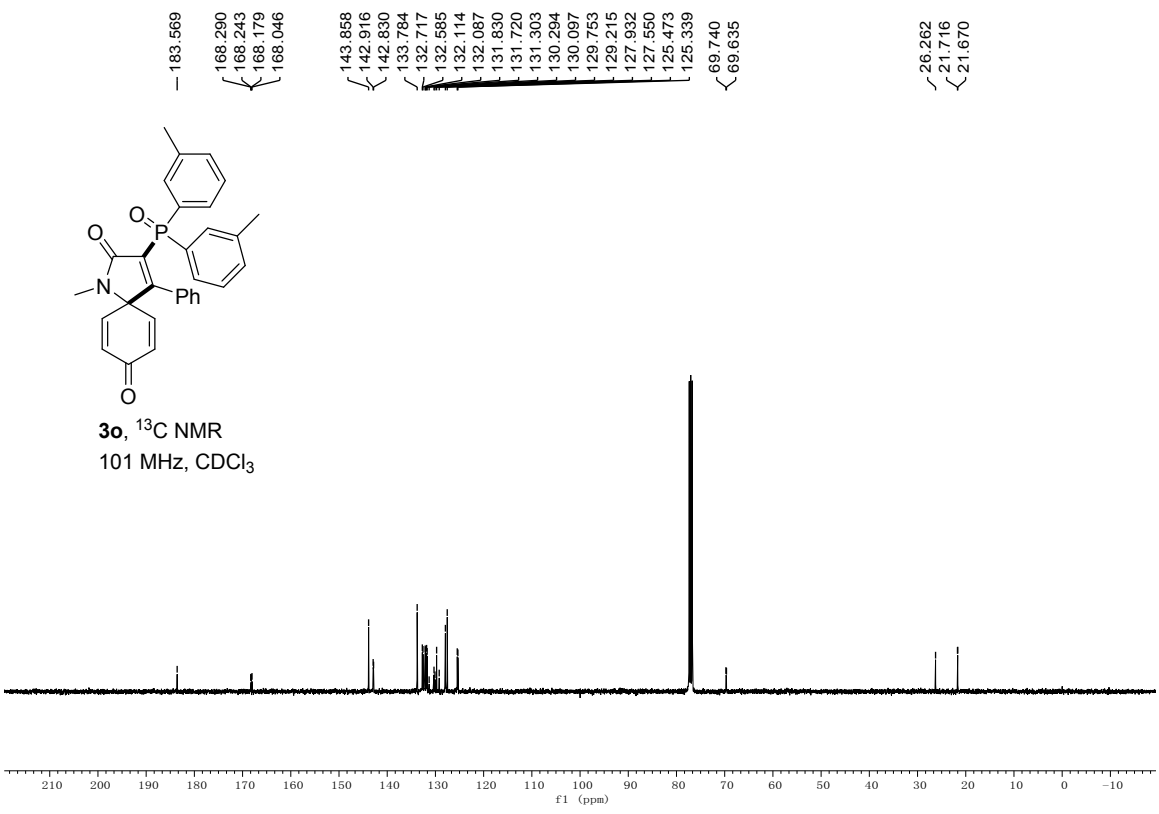

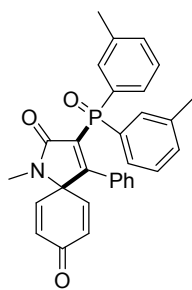

**3o**,  $^{31}\text{P}$  NMR  
162 MHz,  $\text{CDCl}_3$

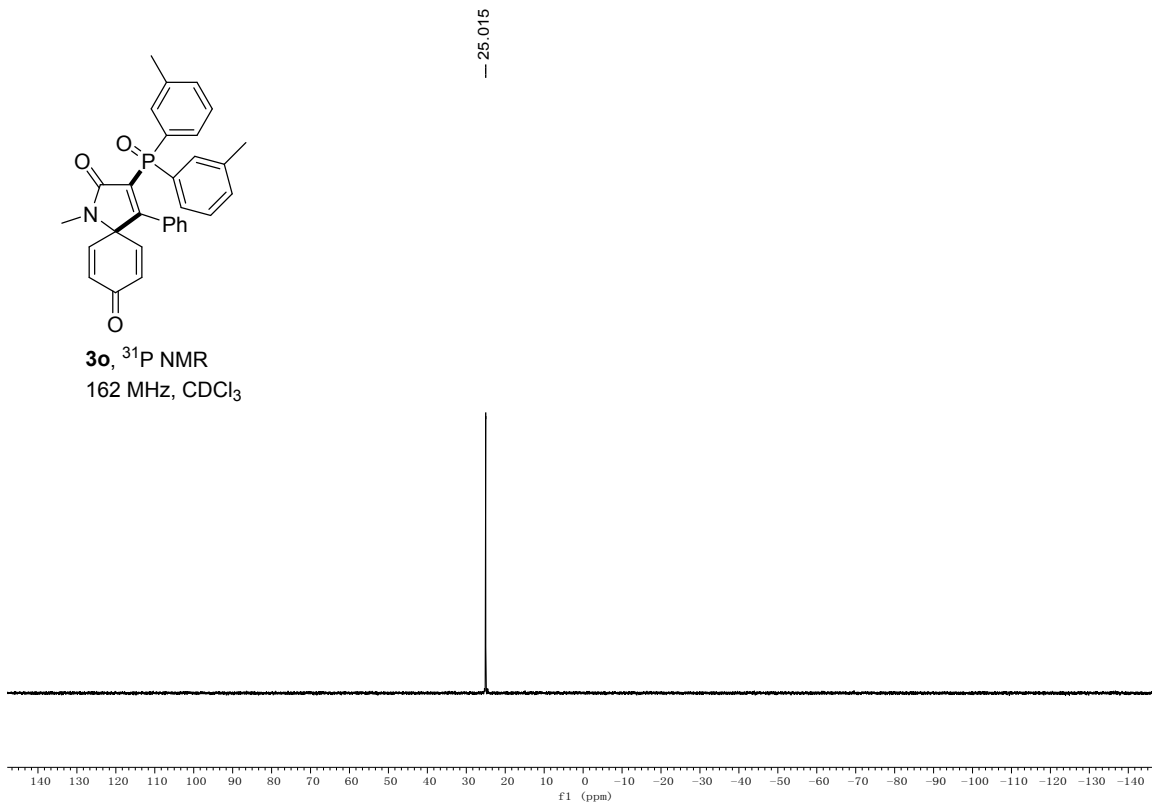

7.820  
7.815  
7.806  
7.798  
7.789  
7.784  
7.775  
7.767  
7.758  
7.753  
7.311  
7.308  
7.304  
7.289  
7.284  
7.275  
7.270  
7.267  
7.205  
7.201  
7.185  
7.167  
7.126  
7.120  
7.104  
7.098  
7.082  
7.077  
7.062  
7.058  
6.520  
6.500  
6.494  
6.488  
6.464  
6.458  
6.452  
6.432  
2.846

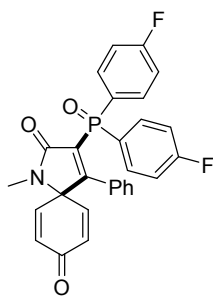

**3p**,  $^1\text{H}$  NMR  
400 MHz,  $\text{CDCl}_3$

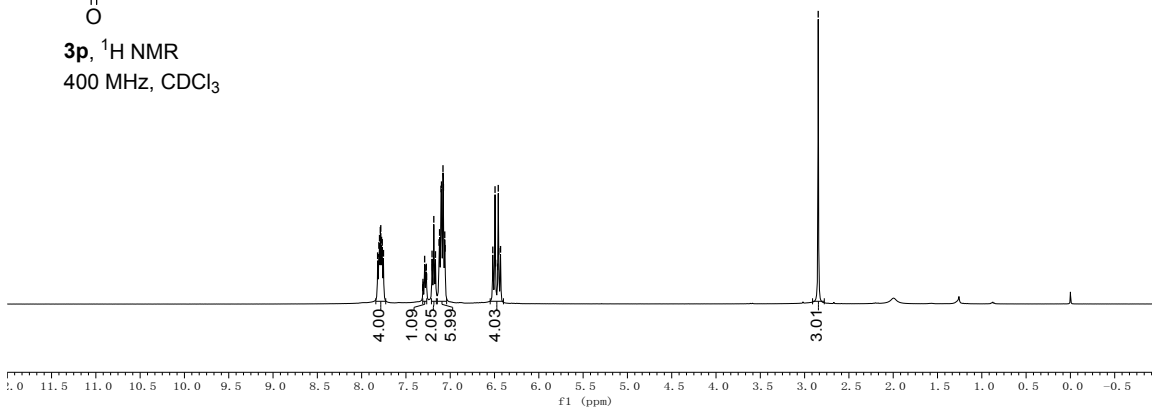



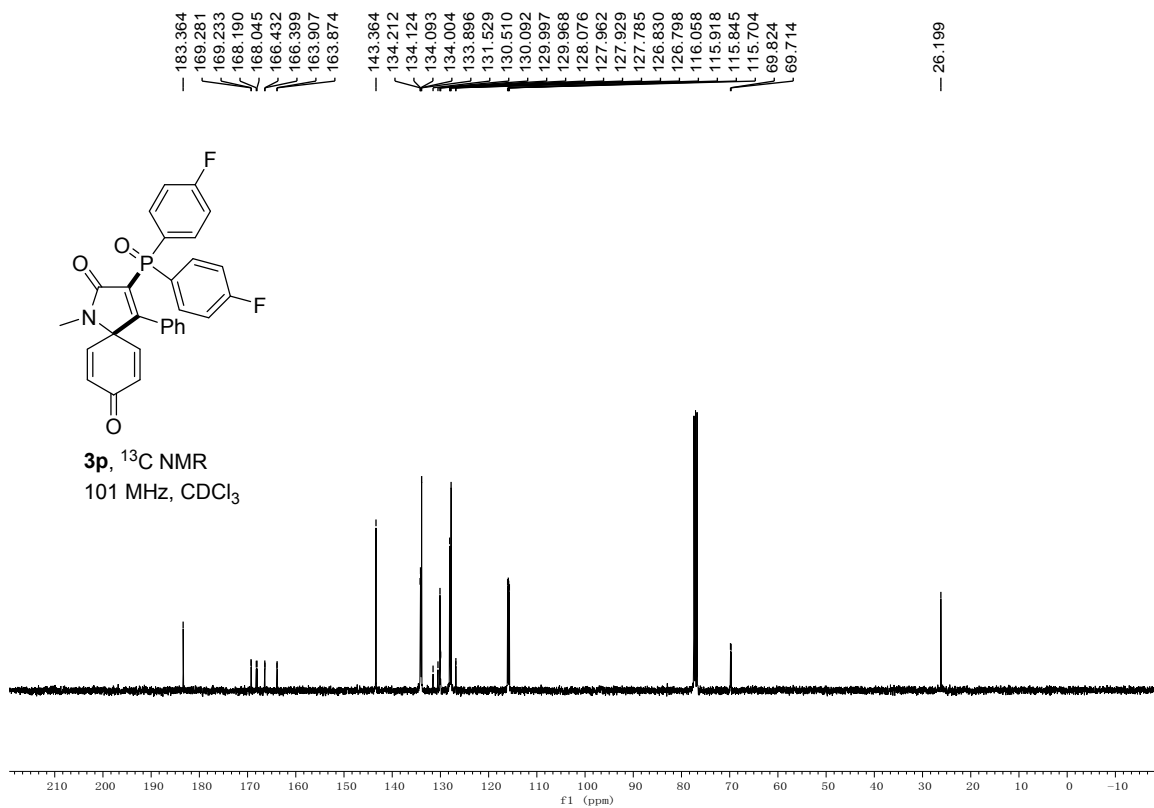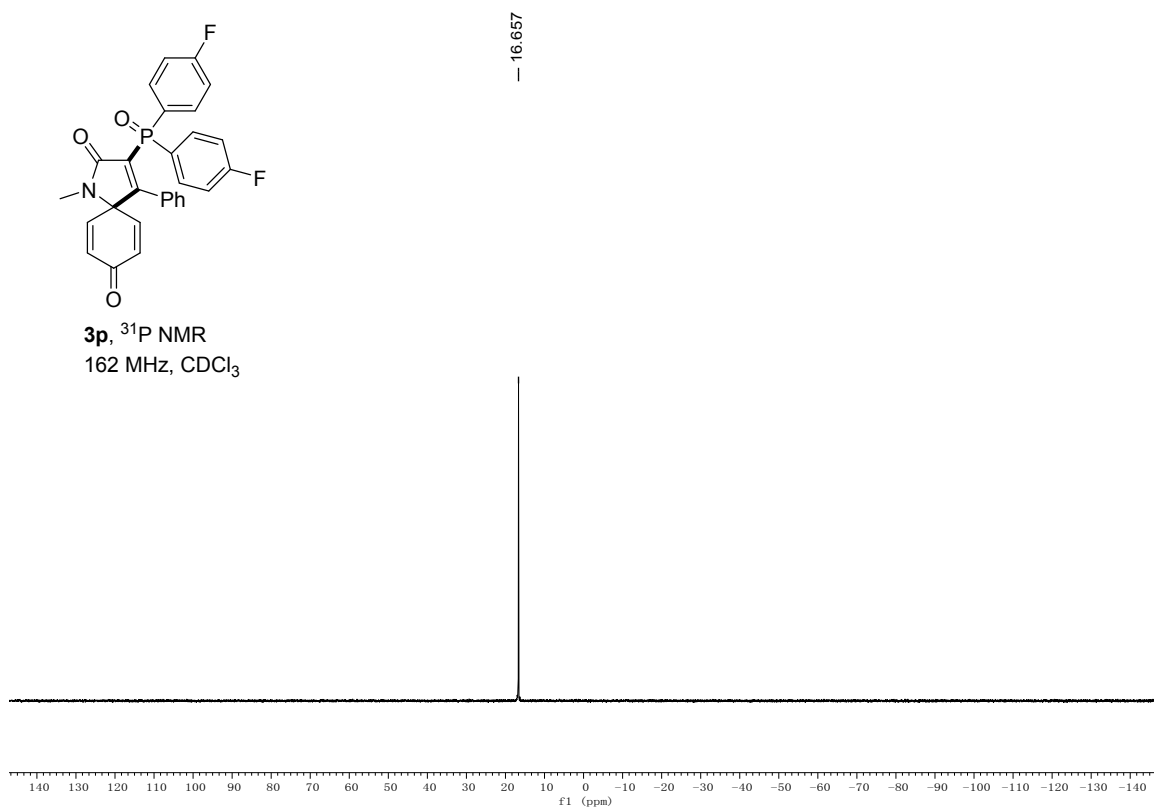

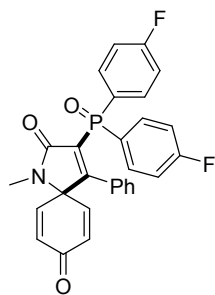

**3q**,  $^{19}\text{F}$  NMR  
376 MHz,  $\text{CDCl}_3$

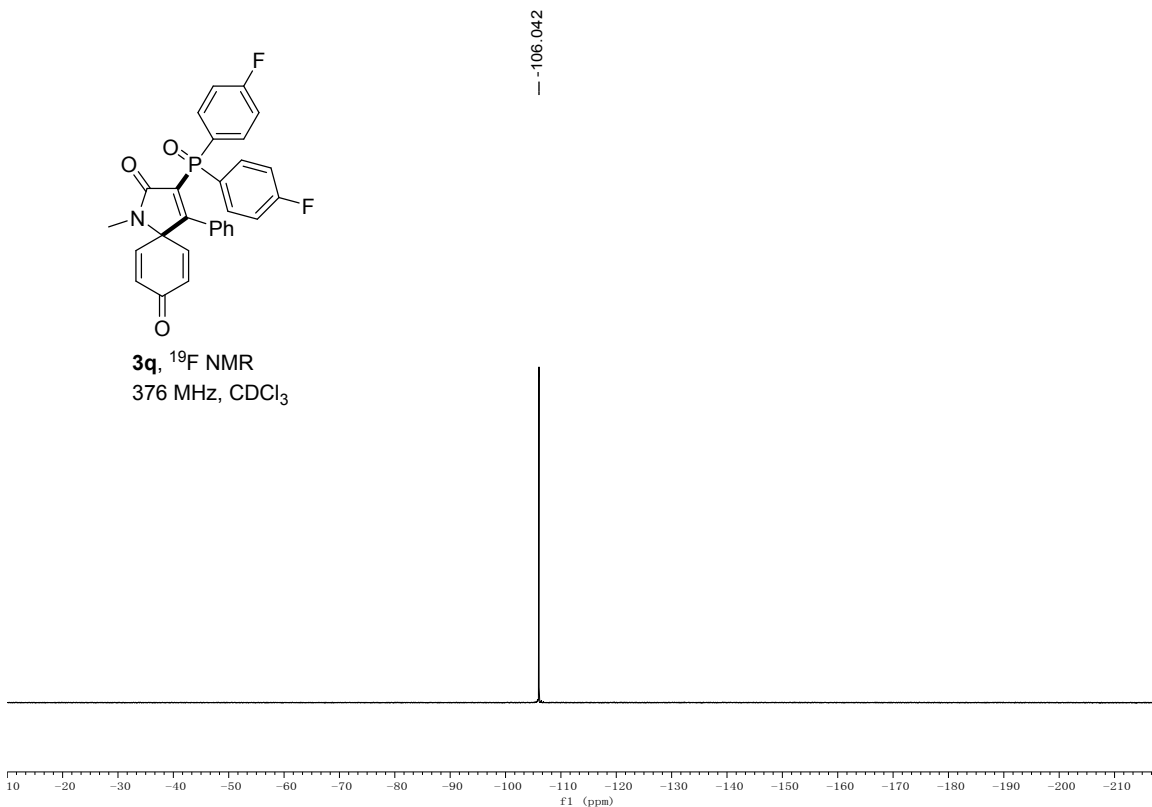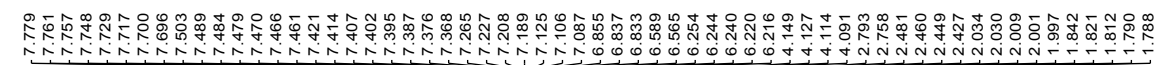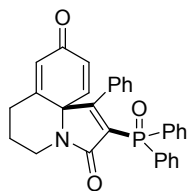

**3a''**,  $^1\text{H}$  NMR  
400 MHz,  $\text{CDCl}_3$

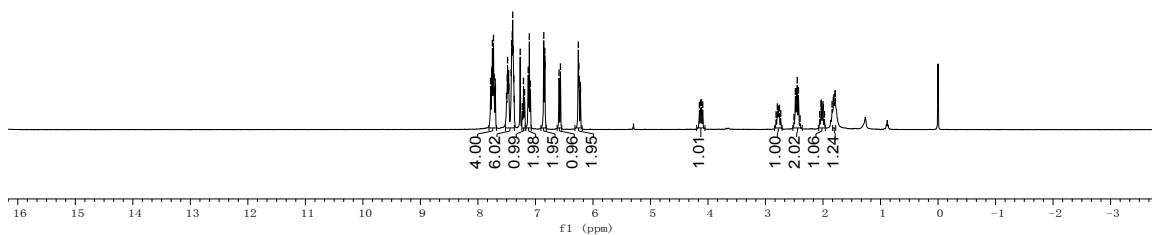

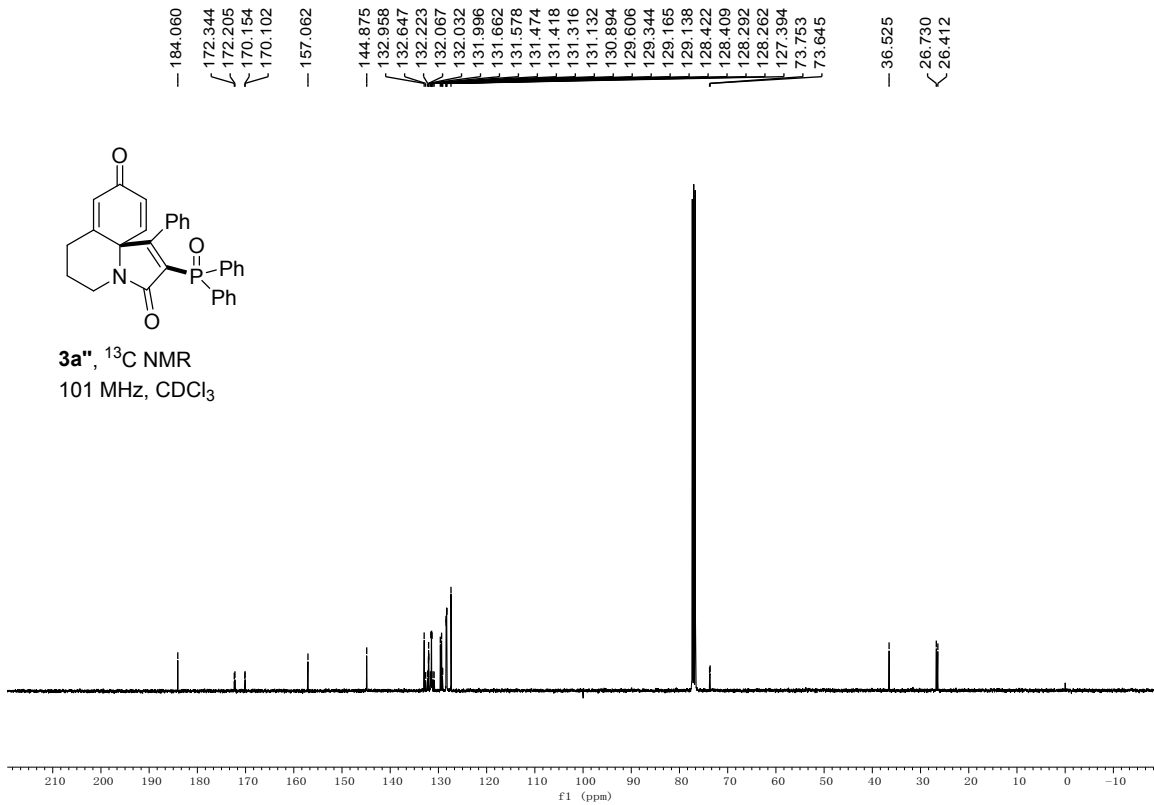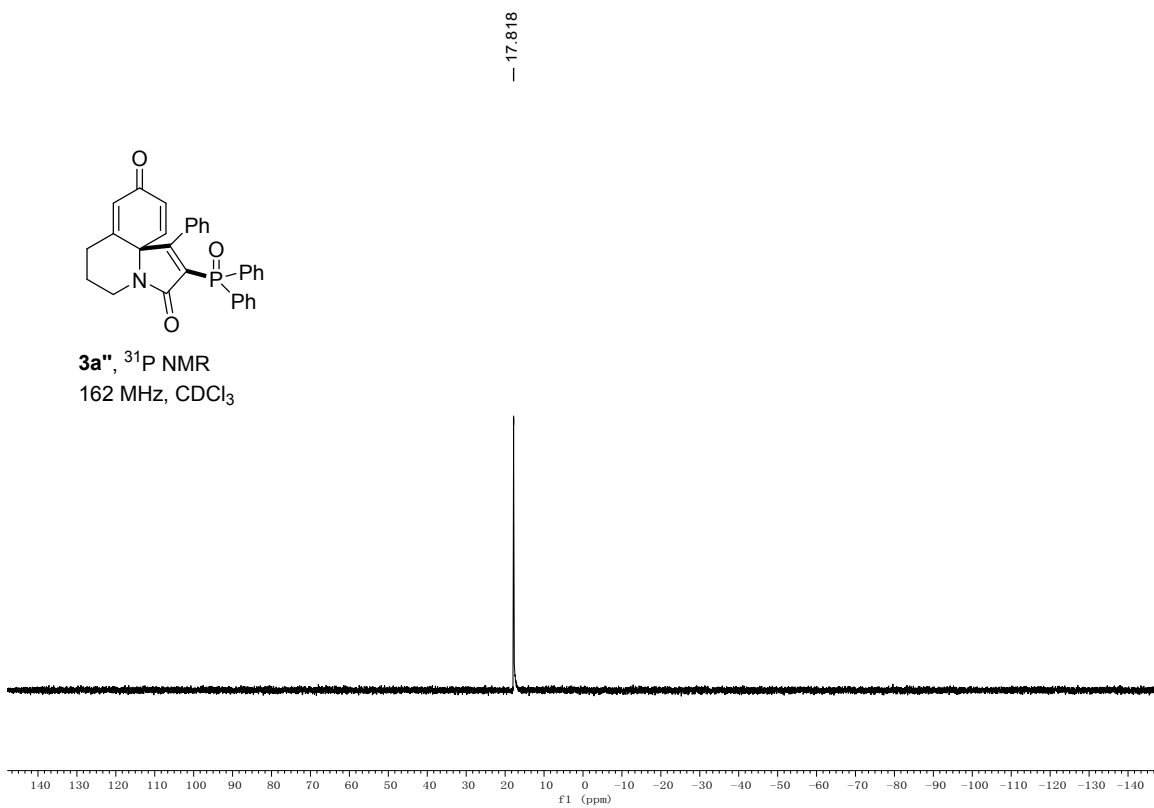

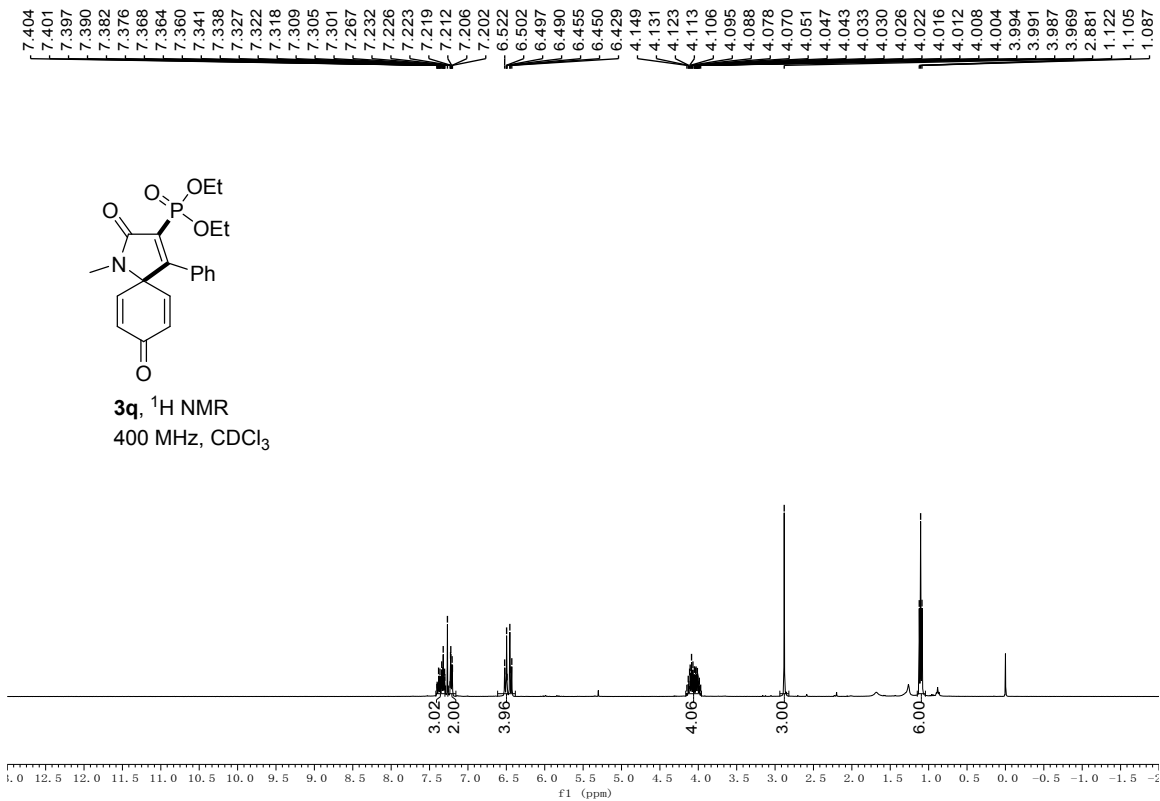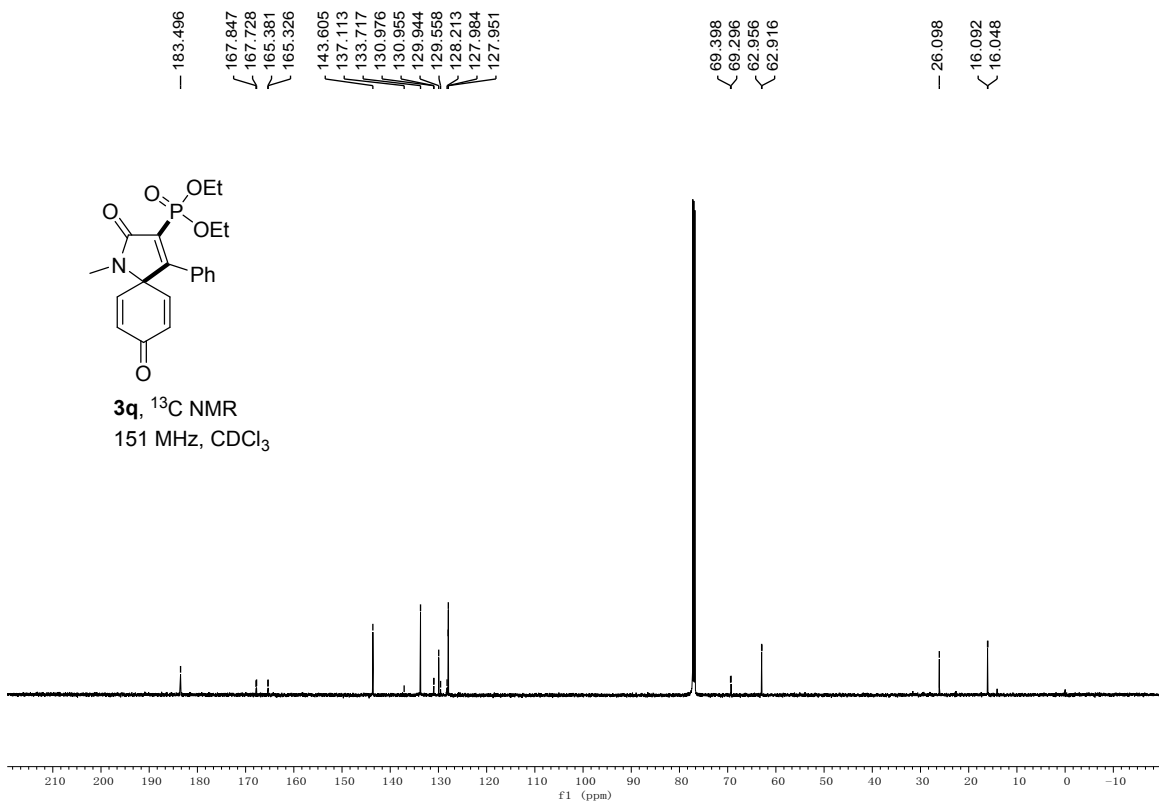

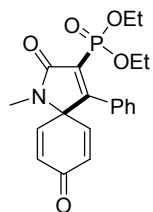

**3q**,  $^{31}\text{P}$  NMR  
162 MHz,  $\text{CDCl}_3$

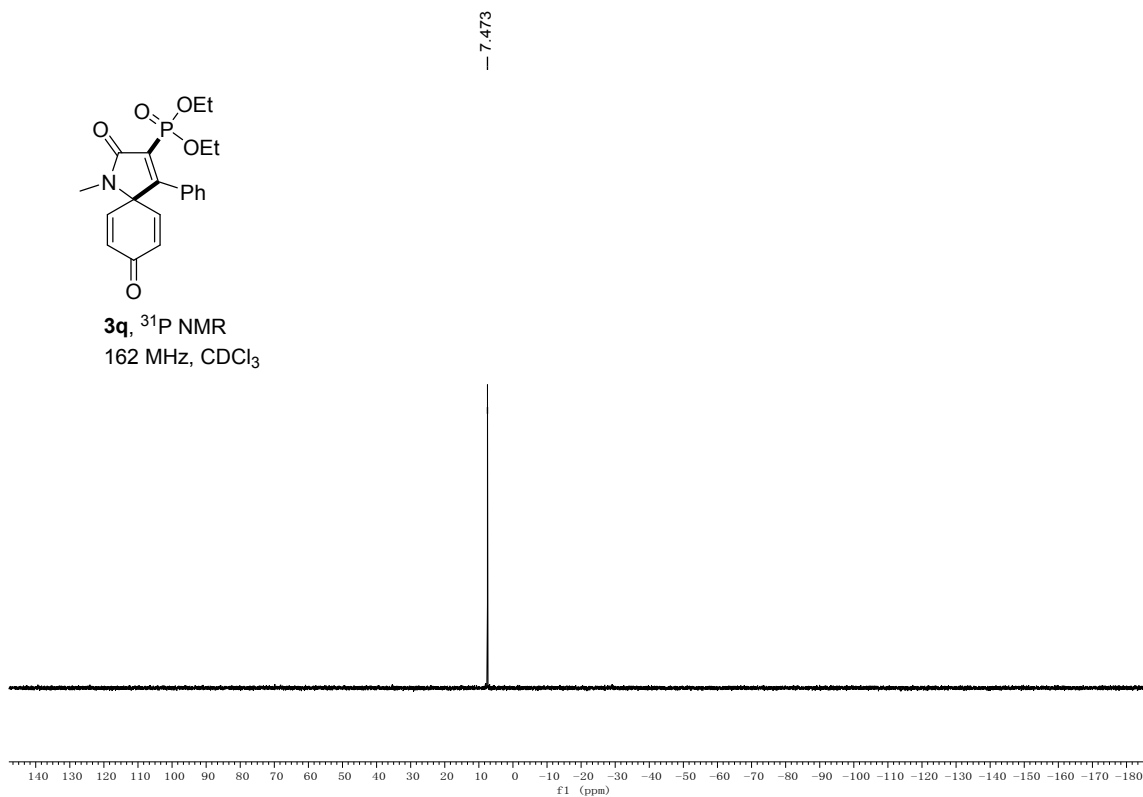

7.406  
7.400  
7.392  
7.388  
7.384  
7.358  
7.344  
7.339  
7.326  
7.321  
7.284  
7.257  
7.252  
7.239  
7.235  
6.516  
6.490  
6.485  
6.460  
6.328  
6.324  
6.321  
4.166  
4.158  
4.148  
4.141  
4.130  
4.123  
4.112  
4.105  
4.093  
4.087  
4.069  
4.053  
4.047  
4.040  
4.036  
4.028  
4.022  
2.812  
1.815  
1.811  
1.153  
1.149  
1.136  
1.131  
1.118  
1.114

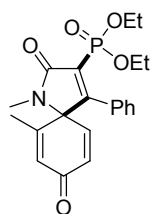

**3r**,  $^1\text{H}$  NMR  
400 MHz,  $\text{CDCl}_3$

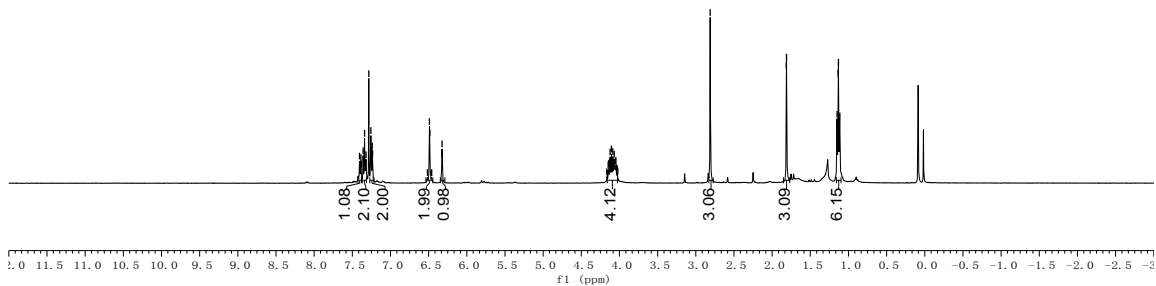

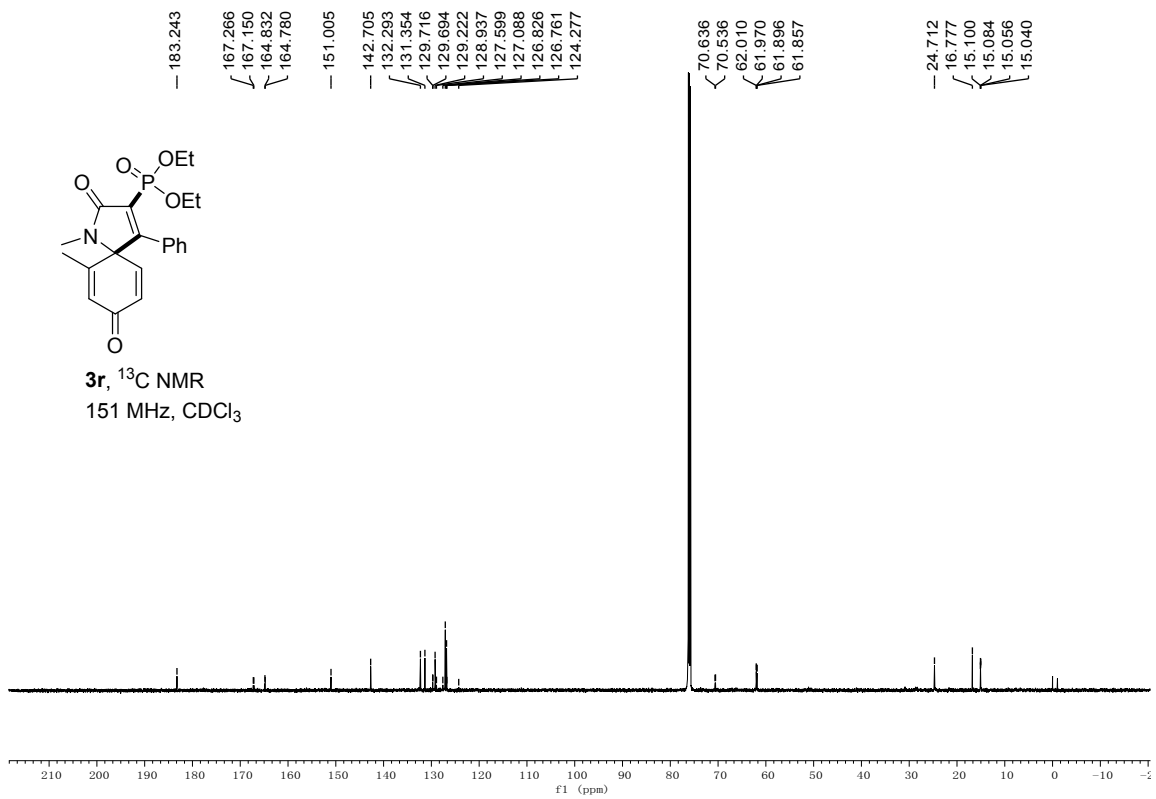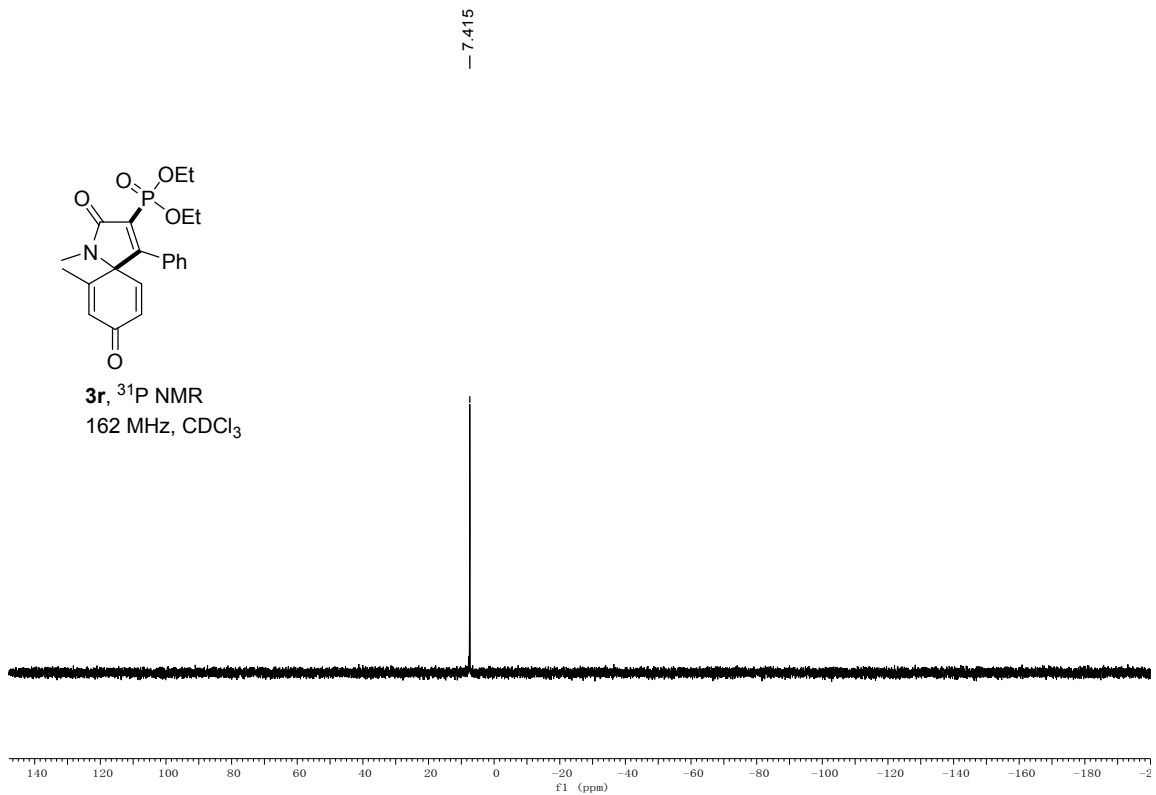



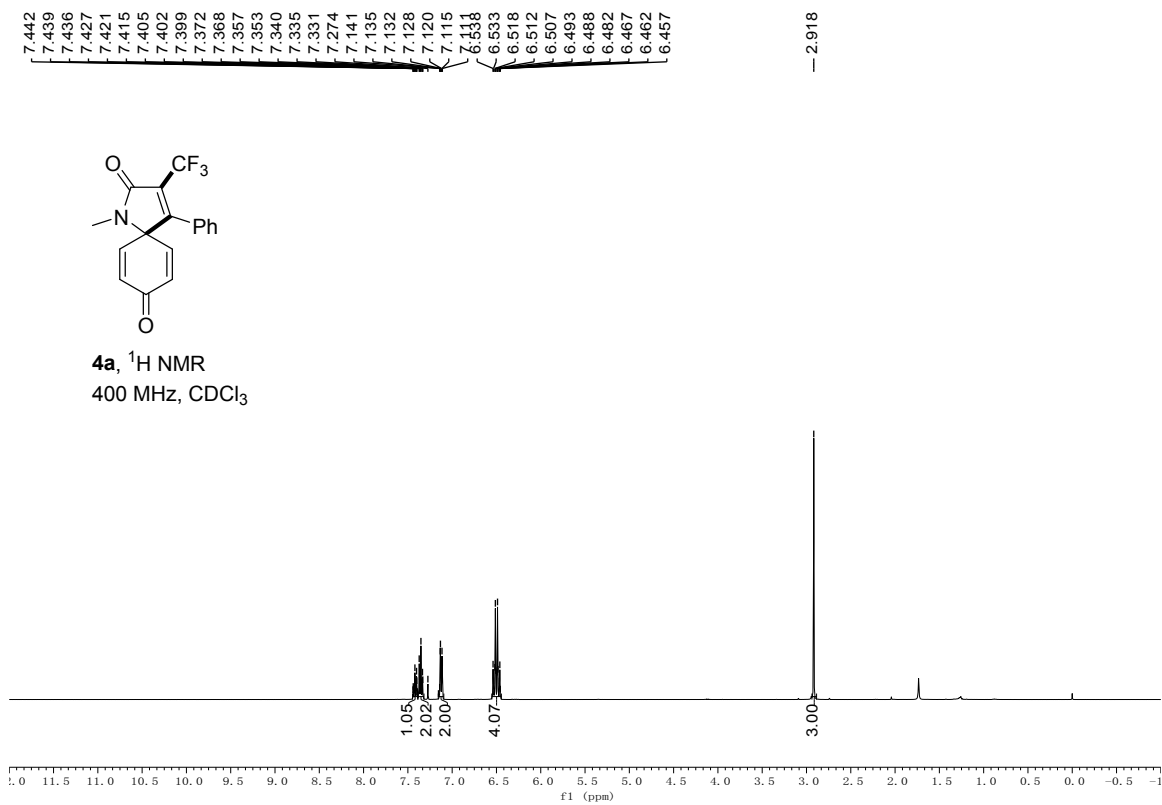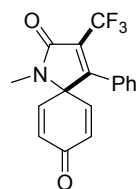

**4a**,  $^1\text{H}$  NMR  
400 MHz,  $\text{CDCl}_3$

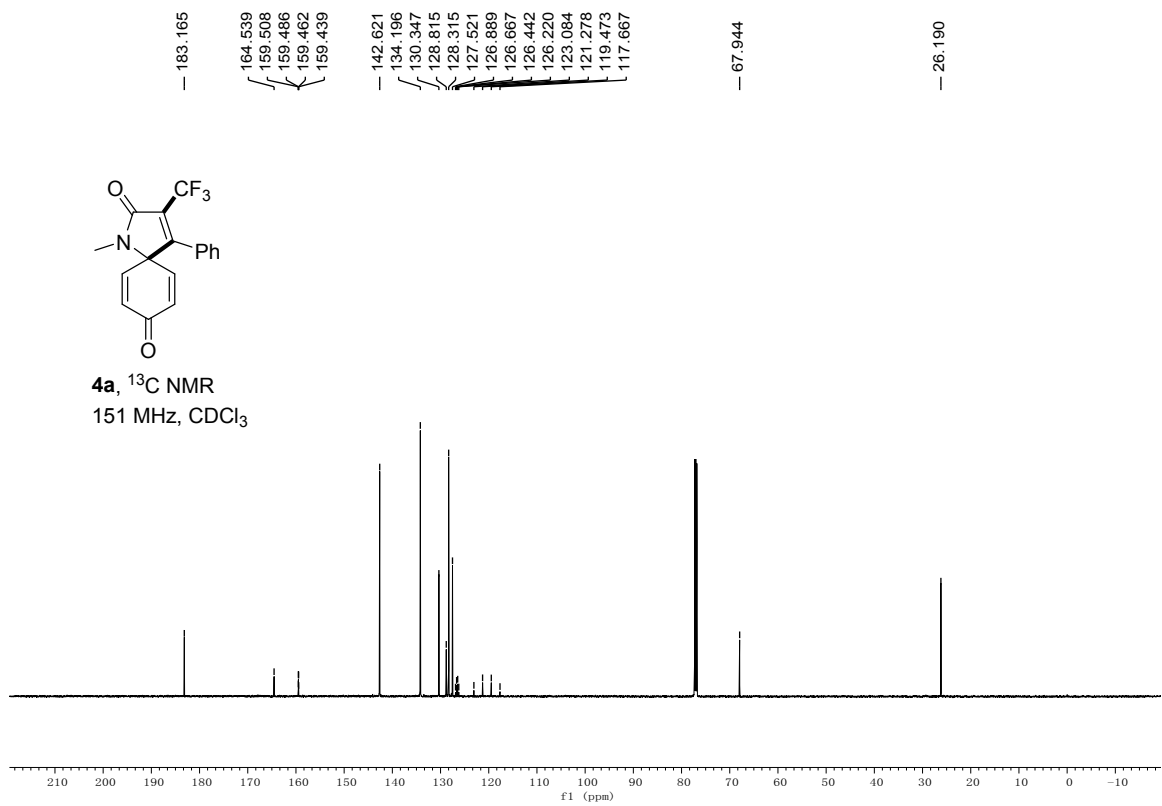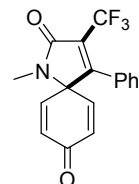

**4a**,  $^{13}\text{C}$  NMR  
151 MHz,  $\text{CDCl}_3$



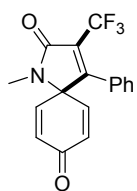

**4a**,  $^{19}\text{F}$  NMR  
376 MHz,  $\text{CDCl}_3$

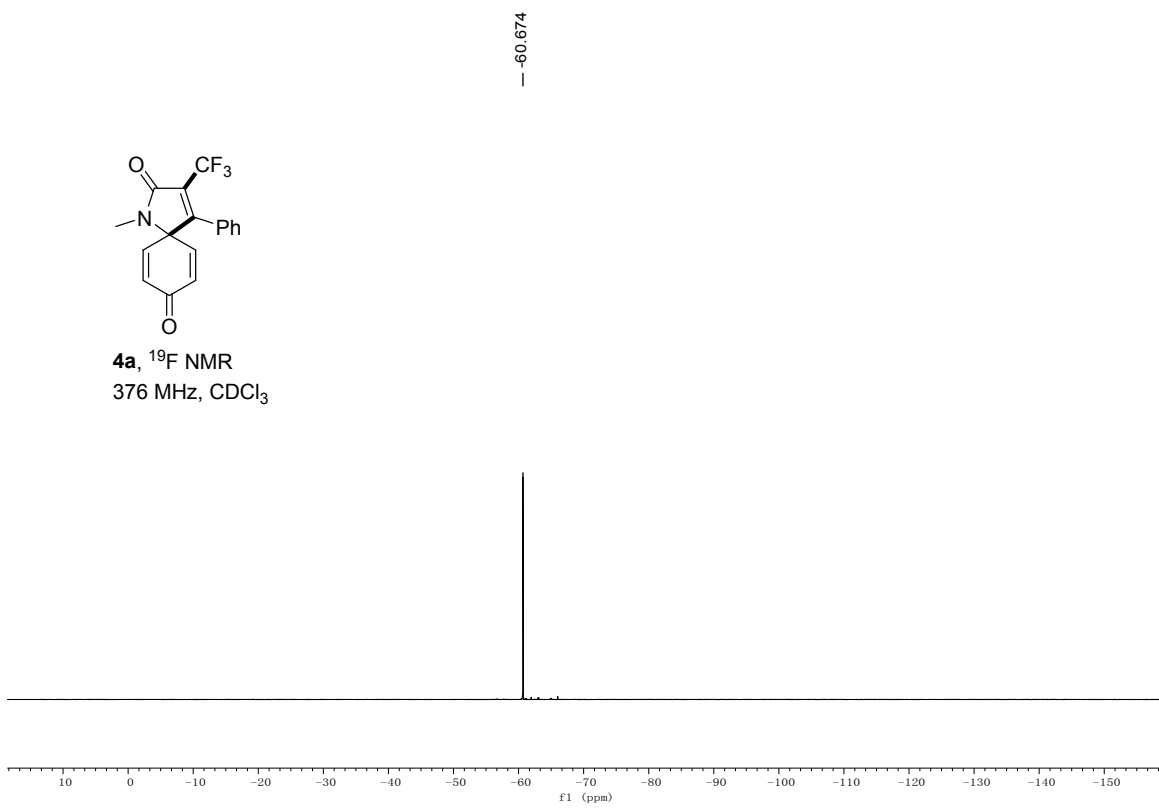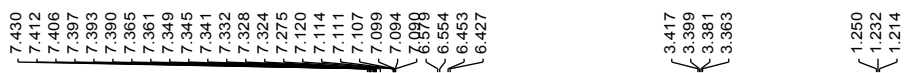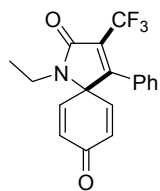

**4b**,  $^1\text{H}$  NMR  
400 MHz,  $\text{CDCl}_3$

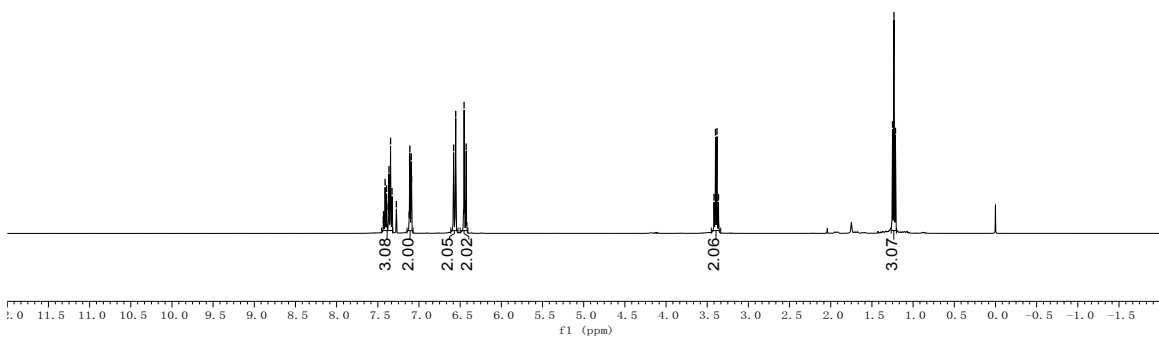

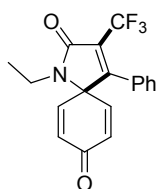

**4b**,  $^{13}\text{C}$  NMR  
151 MHz,  $\text{CDCl}_3$

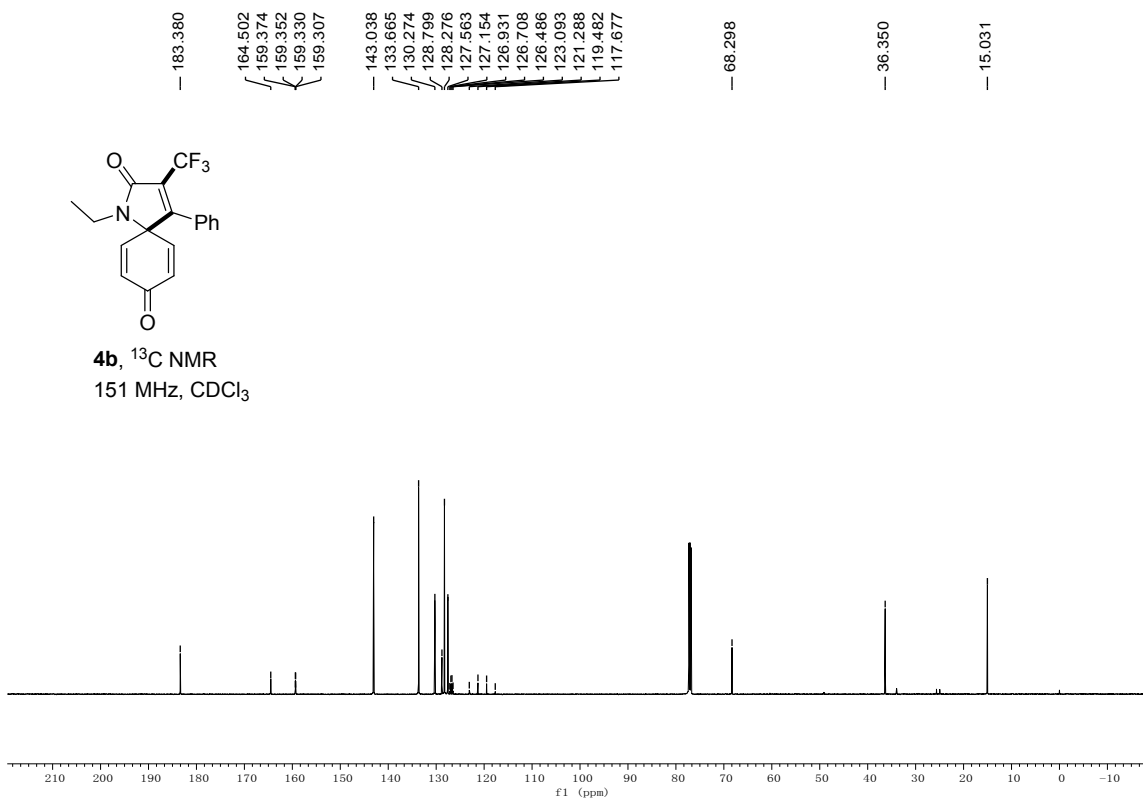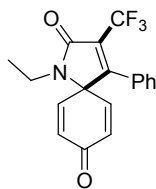

**4b**,  $^{19}\text{F}$  NMR  
376 MHz,  $\text{CDCl}_3$

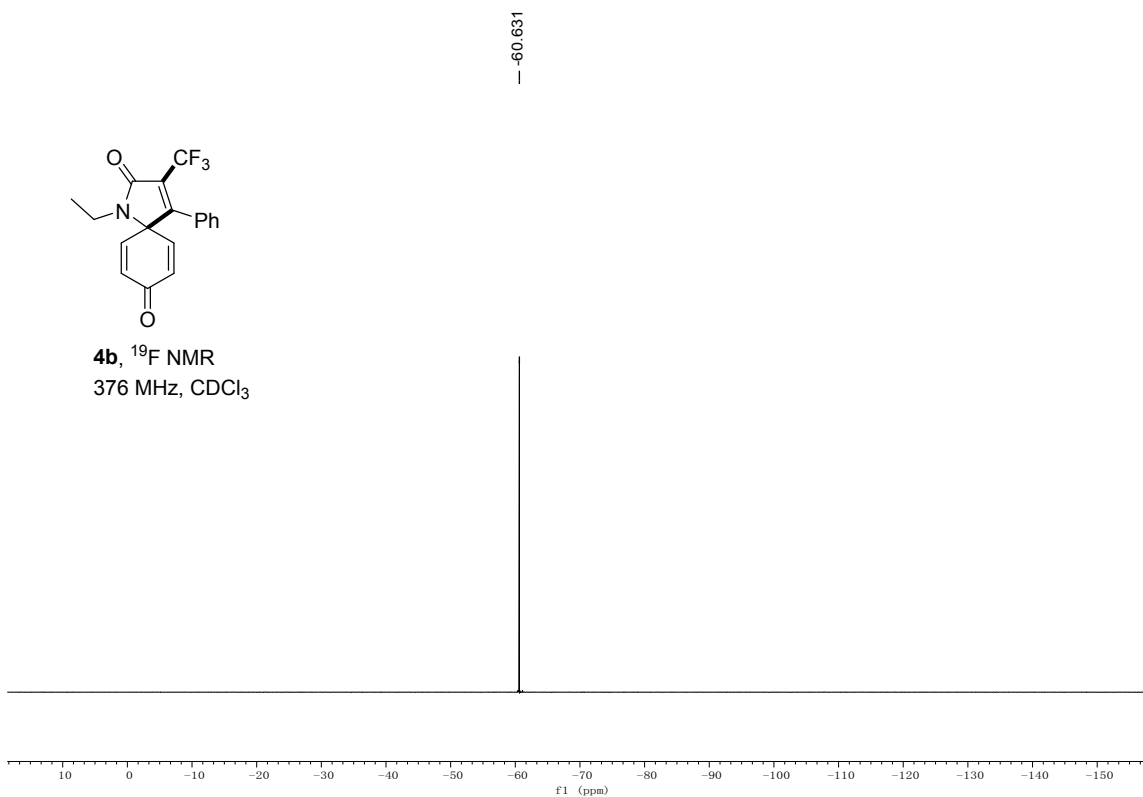

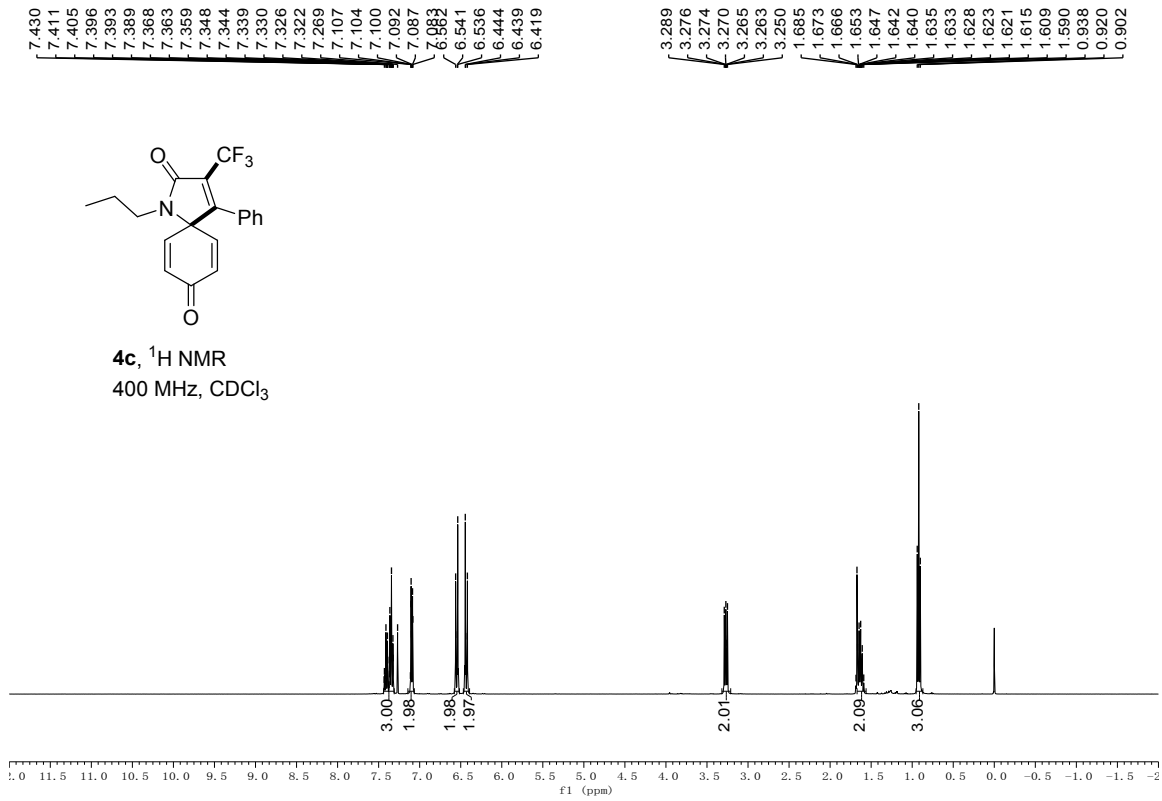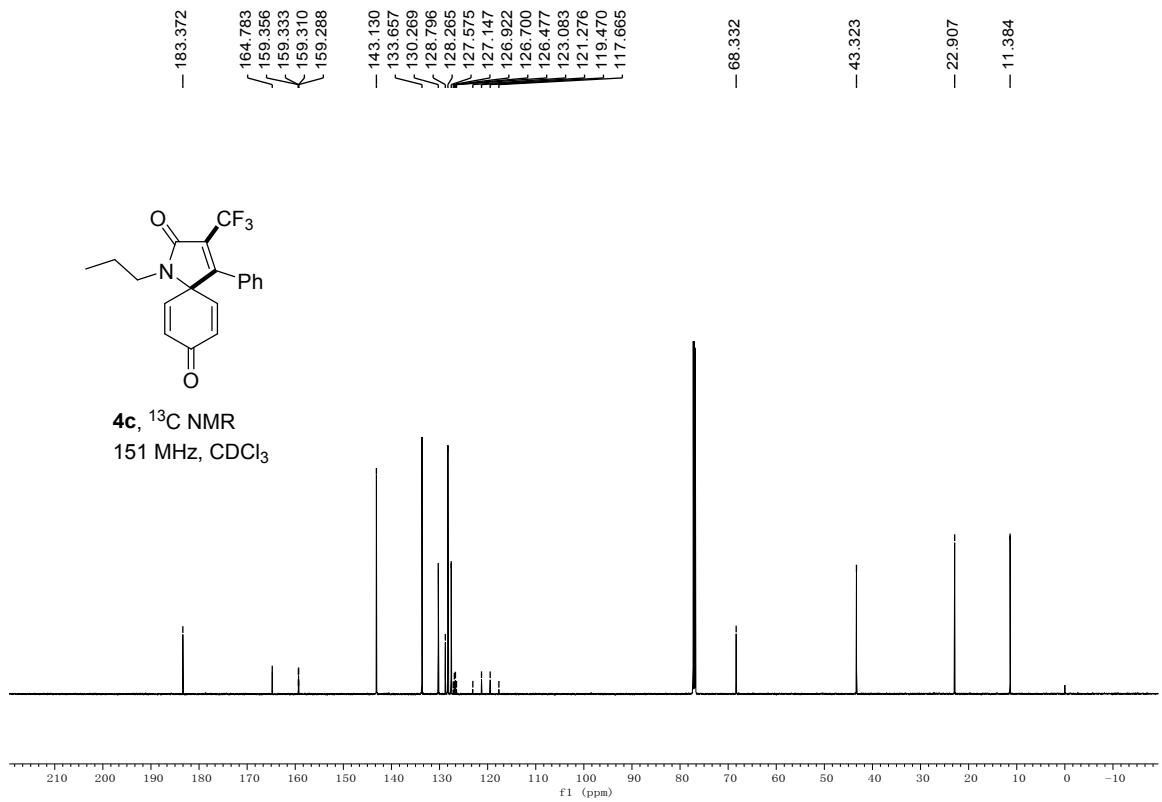

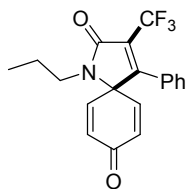

**4c**,  $^{19}\text{F}$  NMR  
376 MHz,  $\text{CDCl}_3$

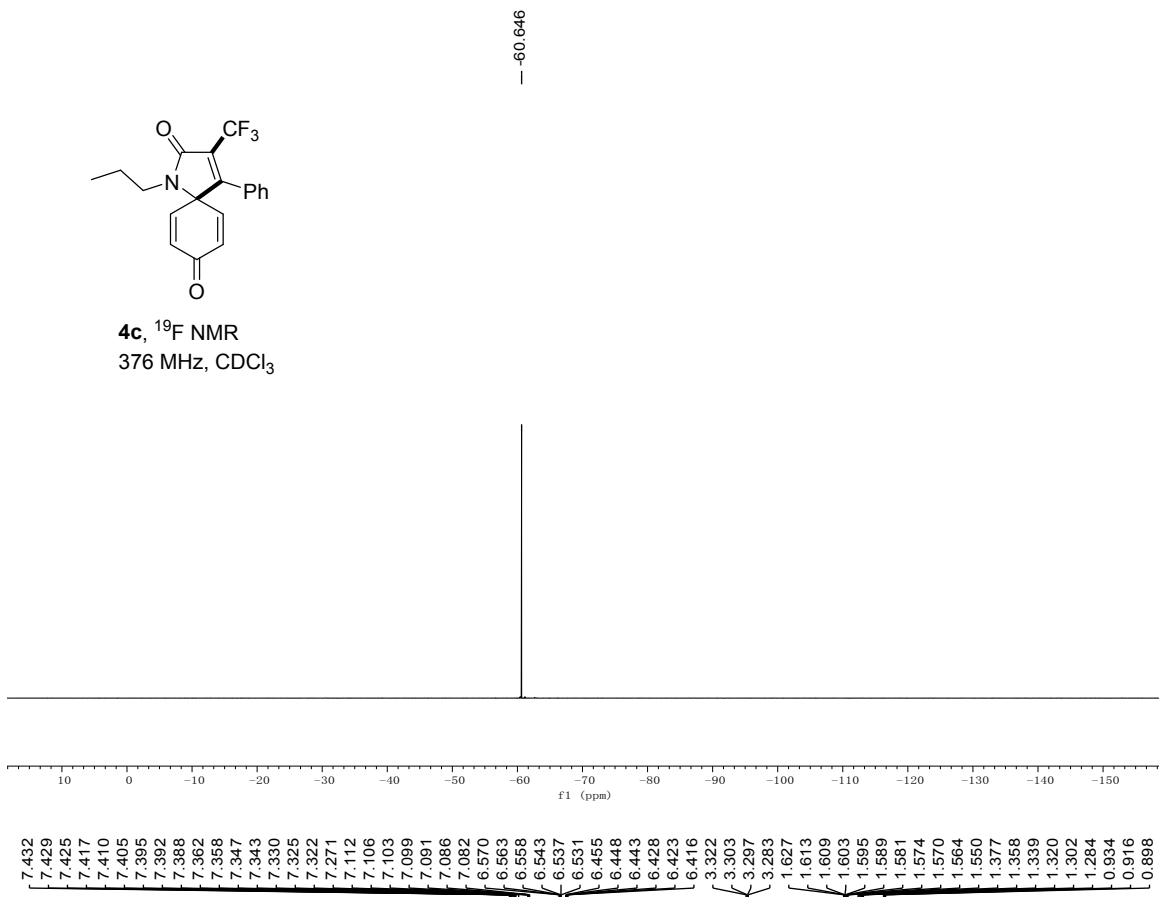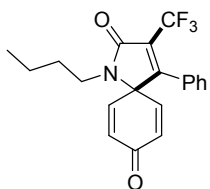

**4d**,  $^1\text{H}$  NMR  
400 MHz,  $\text{CDCl}_3$

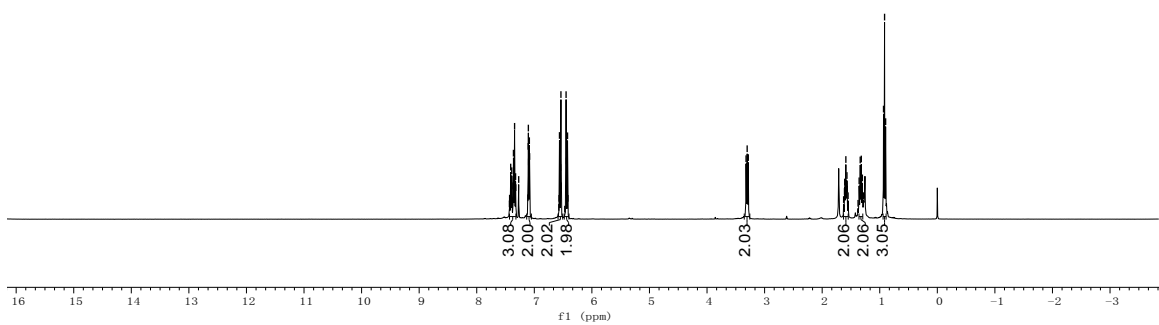

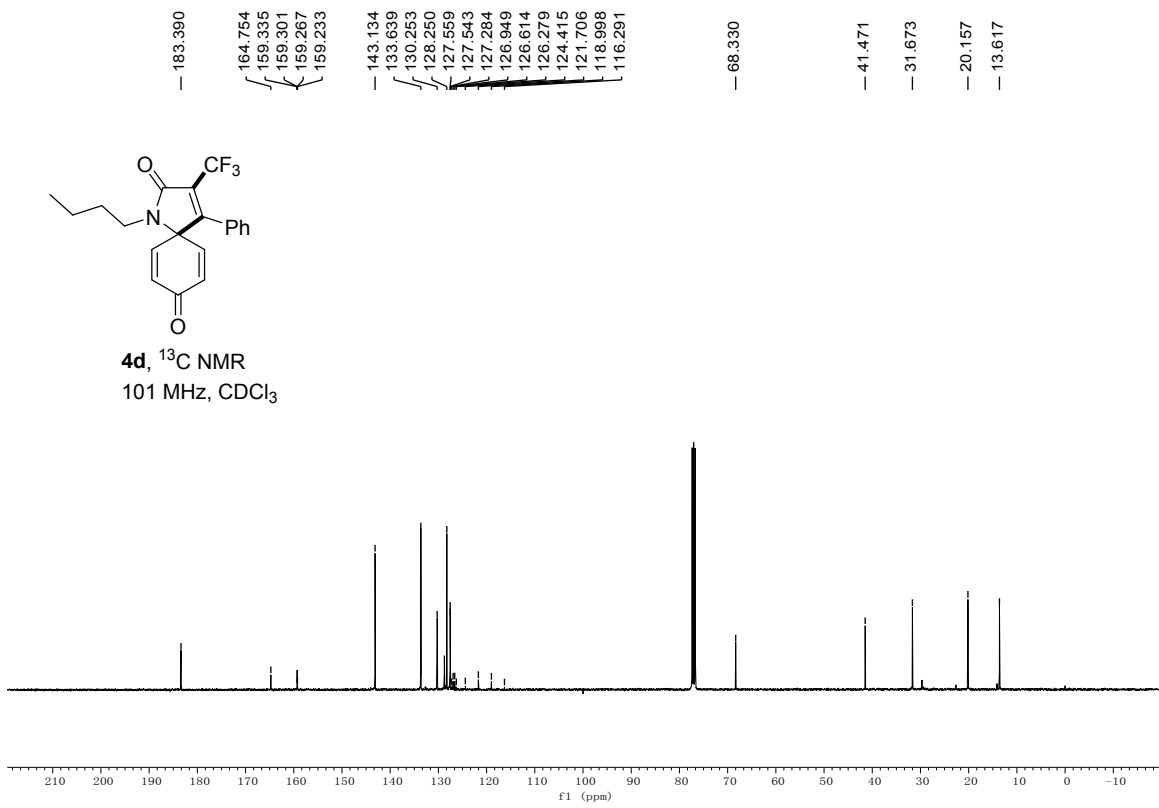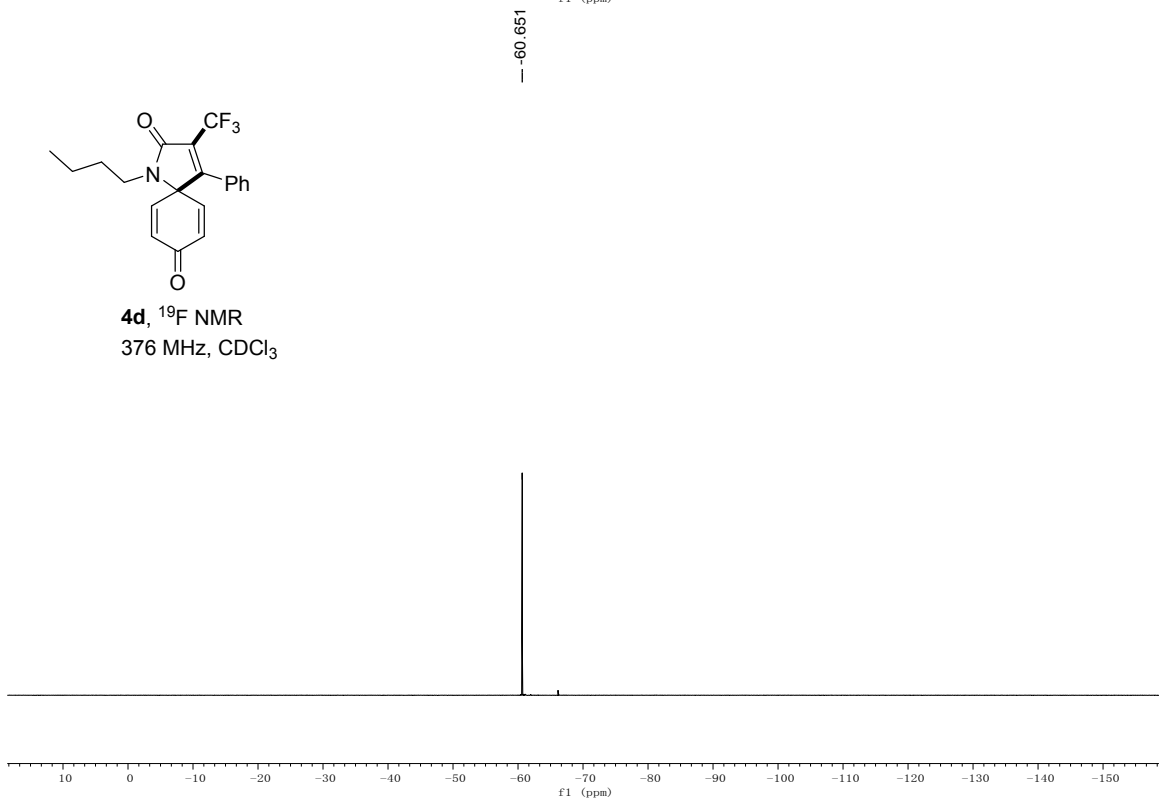

7.388  
7.380  
7.374  
7.361  
7.346  
7.326  
7.310  
7.306  
7.293  
7.288  
7.285  
7.280  
7.272  
7.266  
7.252  
7.242  
7.232  
7.226  
7.053  
7.031  
6.342  
6.337  
6.317  
6.309  
6.252  
6.247  
6.231  
6.227  
— 4.564

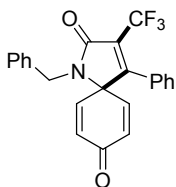

**4e**,  $^1\text{H}$  NMR  
400 MHz,  $\text{CDCl}_3$

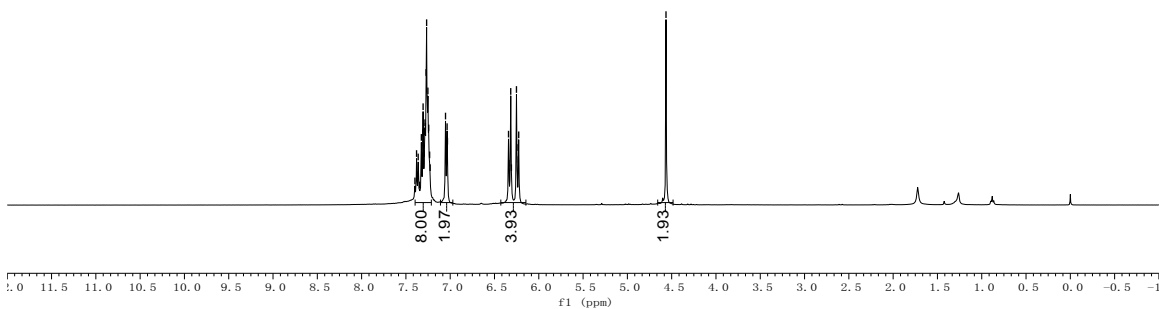

183.365  
164.710  
159.840  
142.858  
136.719  
133.284  
130.267  
129.024  
128.679  
128.561  
128.187  
128.152  
127.565  
126.759  
126.537  
126.312  
126.089  
123.106  
121.302  
119.497  
117.697  
68.290  
44.970

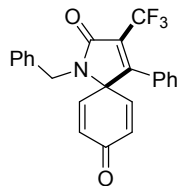

**4e**,  $^{13}\text{C}$  NMR  
151 MHz,  $\text{CDCl}_3$

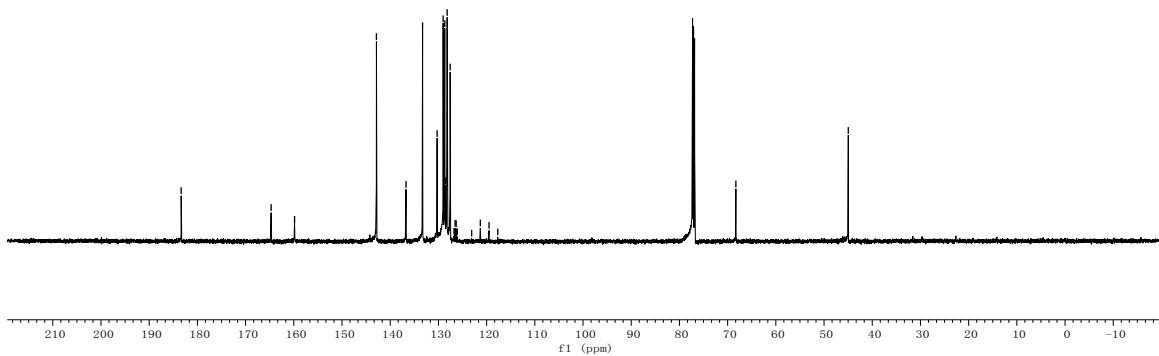



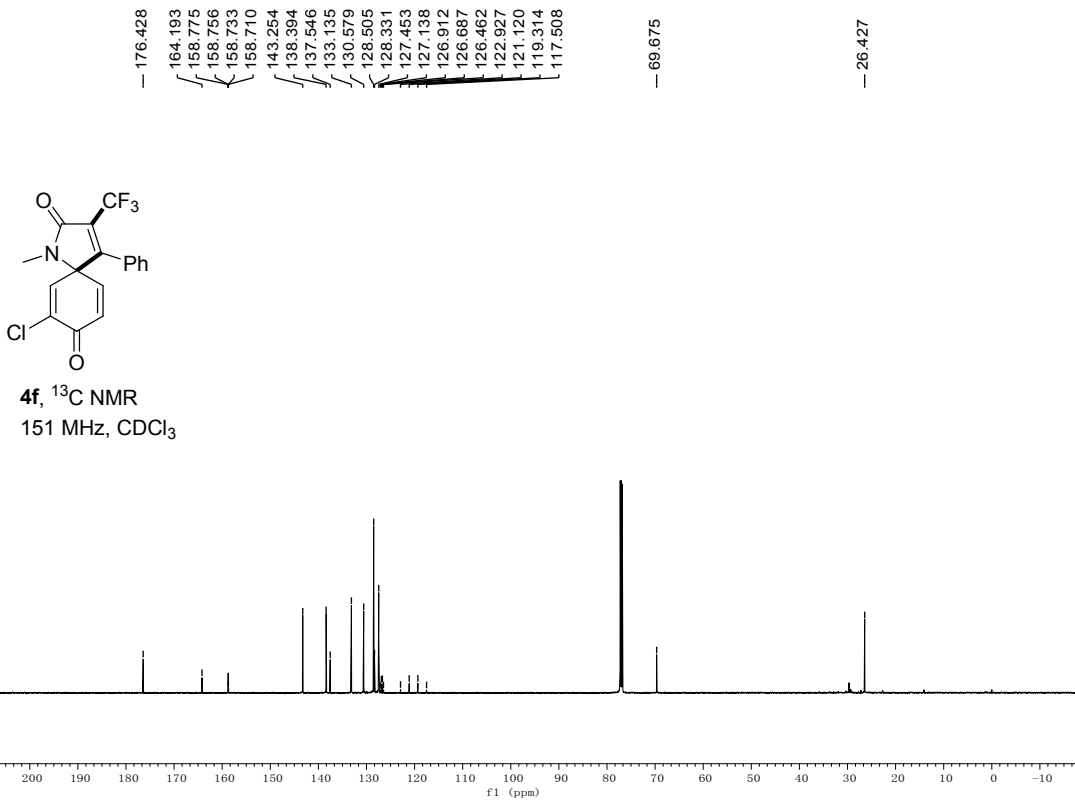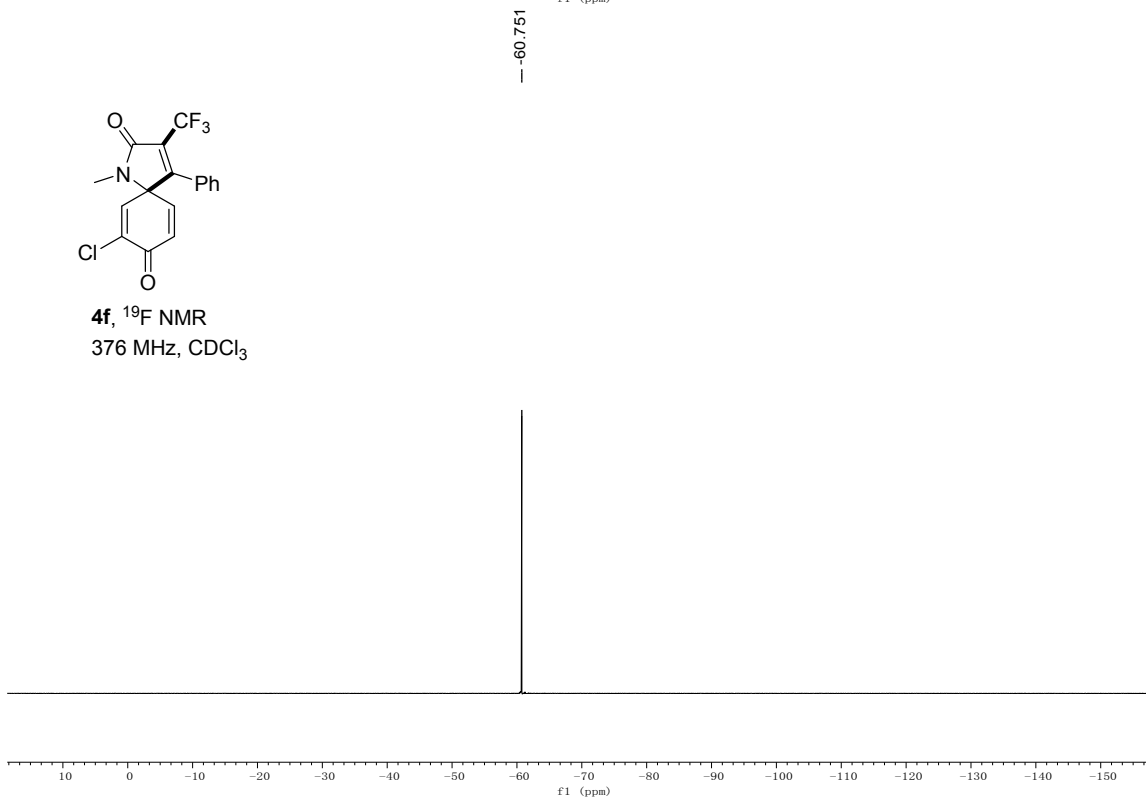



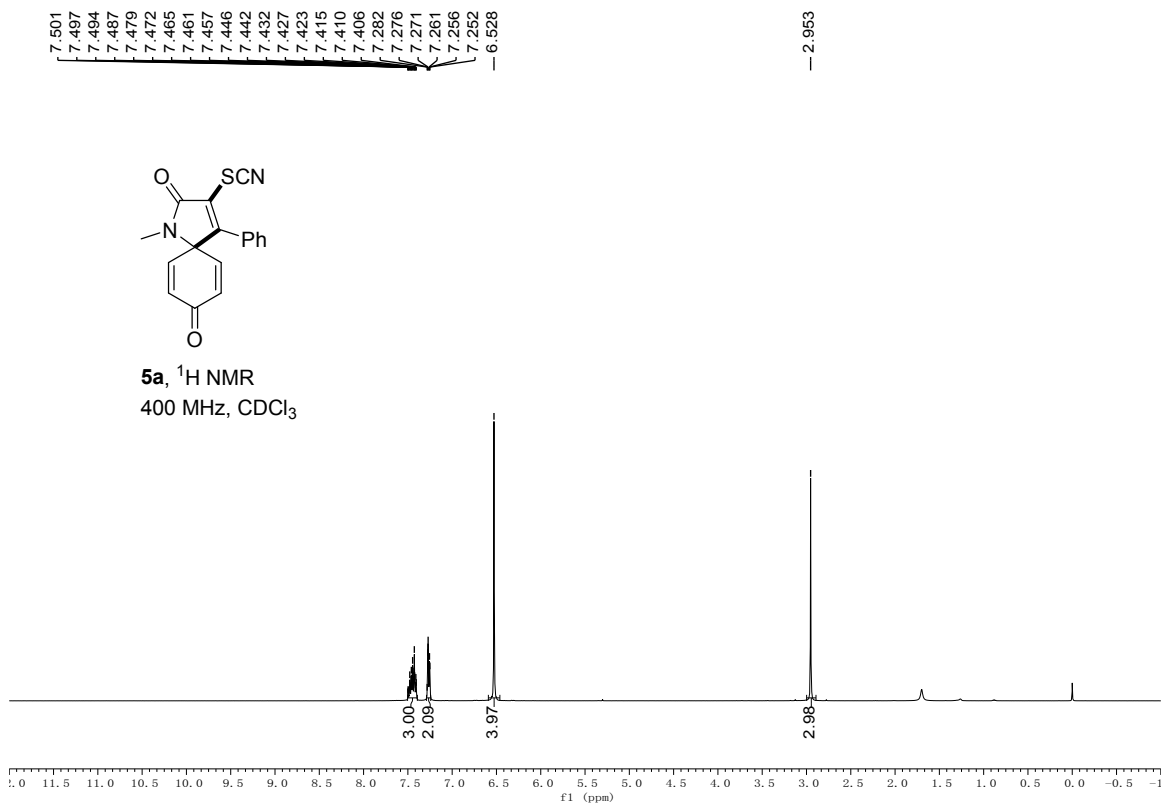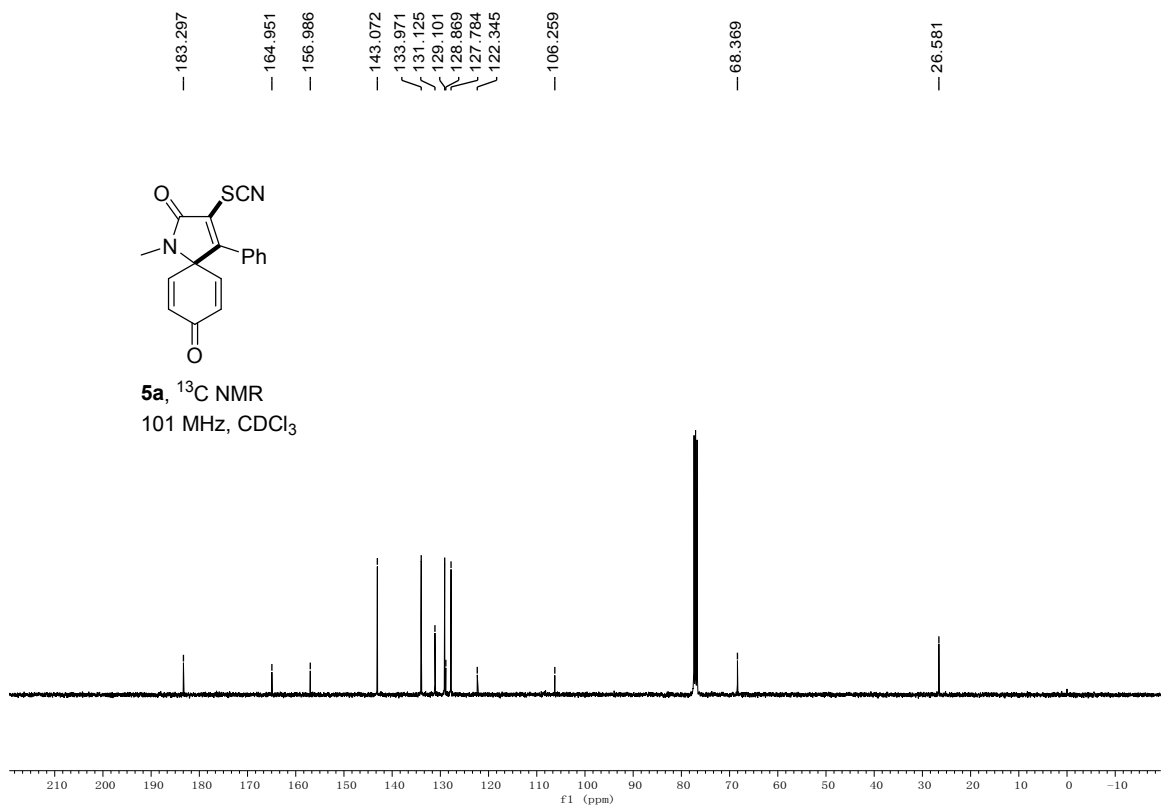

7.484  
7.475  
7.466  
7.459  
7.449  
7.436  
7.417  
7.400  
7.395  
7.284  
7.249  
7.232  
7.227  
6.601  
6.577  
6.500  
6.475

3.438  
3.420  
3.402  
3.384

1.264  
1.246  
1.228

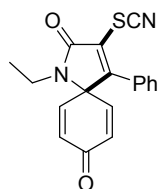

**5b**,  $^1\text{H}$  NMR  
400 MHz,  $\text{CDCl}_3$

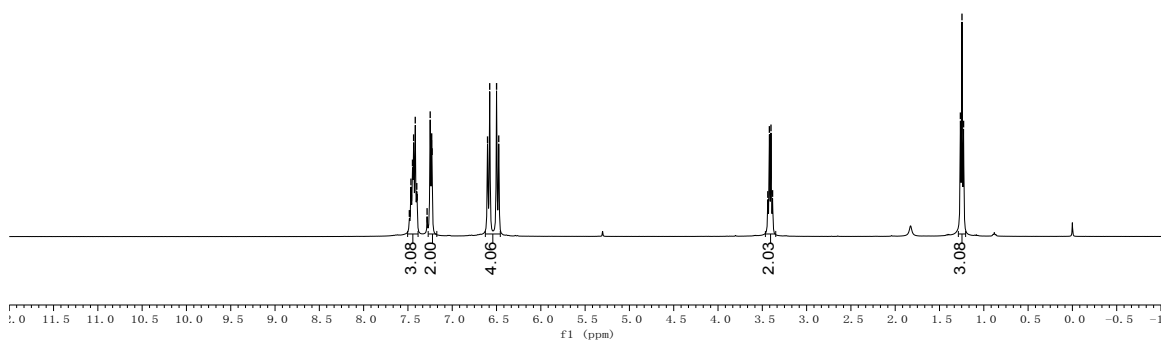

183.530  
164.869  
156.715  
143.456  
133.430  
130.982  
129.024  
128.870  
127.812  
122.638  
106.285  
68.815  
36.774  
15.052

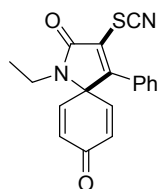

**5b**,  $^{13}\text{C}$  NMR  
101 MHz,  $\text{CDCl}_3$

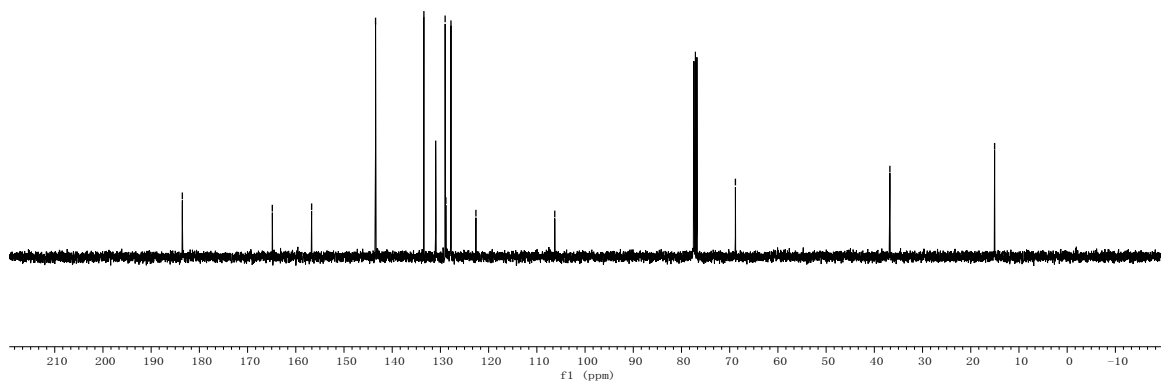

7.481  
7.477  
7.471  
7.462  
7.456  
7.449  
7.445  
7.440  
7.432  
7.418  
7.413  
7.396  
7.391  
7.285  
7.246  
7.242  
7.238  
7.226  
7.221  
6.593  
6.588  
6.573  
6.568  
6.561  
6.497  
6.490  
6.485  
6.470  
6.465

3.311  
3.297  
3.292  
3.286  
3.272  
1.701  
1.682  
1.663  
1.644  
1.625  
1.607  
0.936  
0.918  
0.899

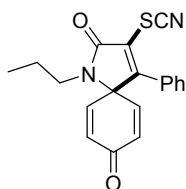

**5c**,  $^1\text{H}$  NMR  
400 MHz,  $\text{CDCl}_3$

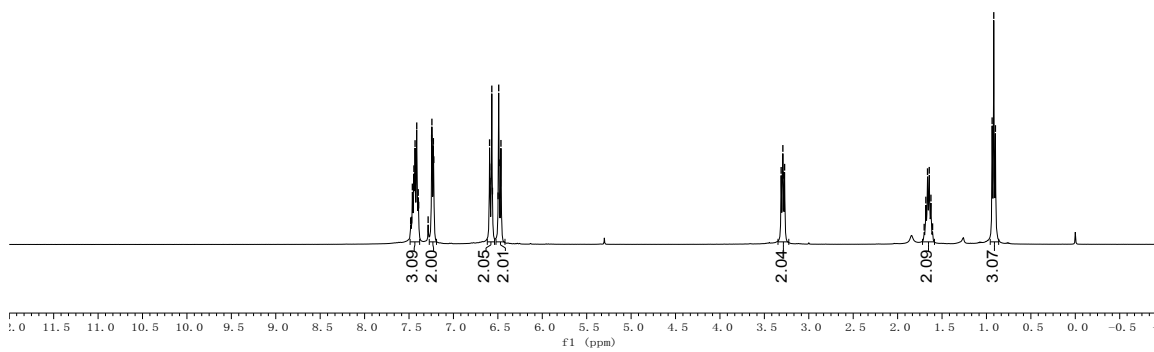

183.532  
165.163  
156.677  
143.553  
133.414  
130.959  
129.004  
128.864  
127.827  
122.648  
106.280

68.858  
43.725  
22.896  
11.391

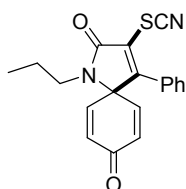

**5c**,  $^{13}\text{C}$  NMR  
101 MHz,  $\text{CDCl}_3$

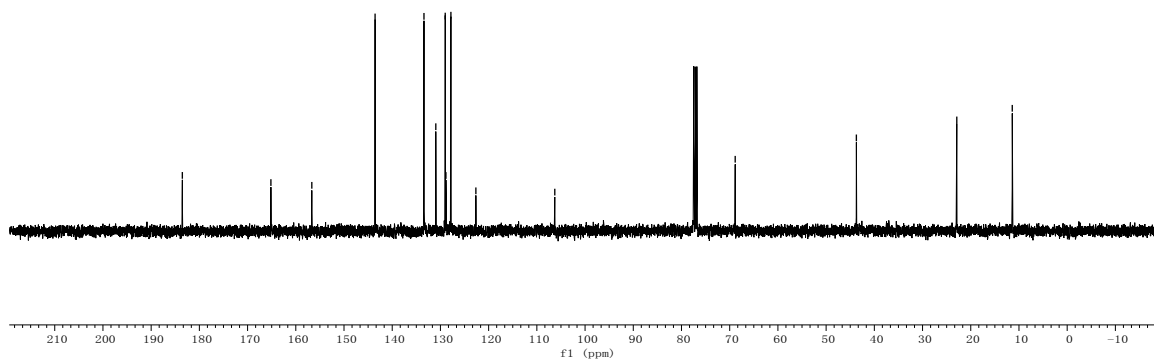

7.481 7.463 7.456 7.449 7.445 7.441 7.432 7.428 7.418 7.414 7.409 7.401 7.396 7.392 7.284 7.249 7.243 7.240 7.235 7.228 7.223 7.223 6.588 6.563 6.494 6.469

3.345 3.330 3.325 3.320 3.306 1.644 1.629 1.625 1.620 1.612 1.606 1.598 1.590 1.586 1.581 1.567 1.375 1.357 1.338 1.319 1.301 1.282 0.932 0.914 0.896

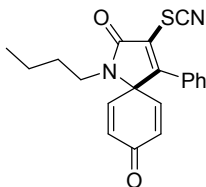

**5d**,  $^1\text{H}$  NMR  
400 MHz,  $\text{CDCl}_3$

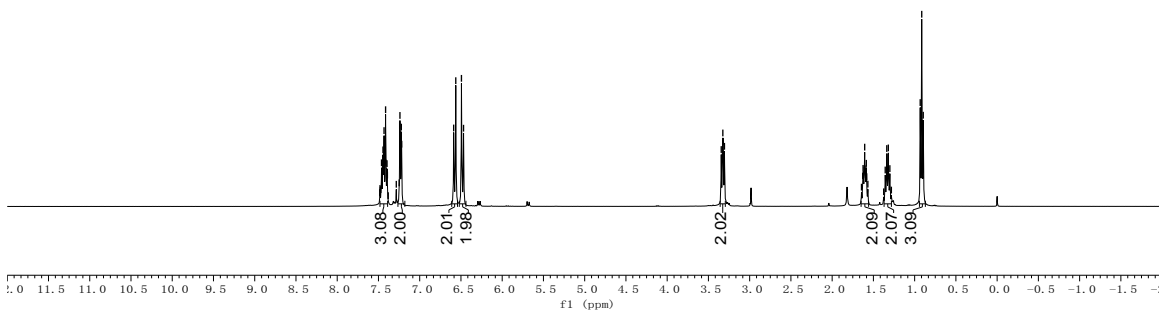

183.522 165.109 156.611 143.564 133.412 130.956 129.005 128.870 127.824 122.660 106.259 68.865 41.900 31.647 20.157 13.635

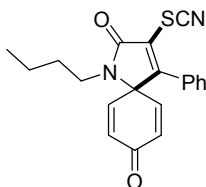

**5d**,  $^{13}\text{C}$  NMR  
101 MHz,  $\text{CDCl}_3$

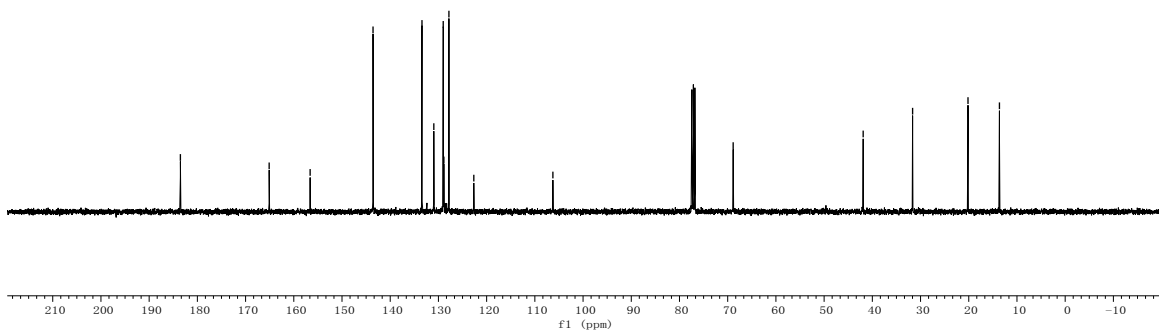

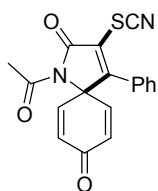

**5e**,  $^1\text{H}$  NMR  
400 MHz,  $\text{CDCl}_3$

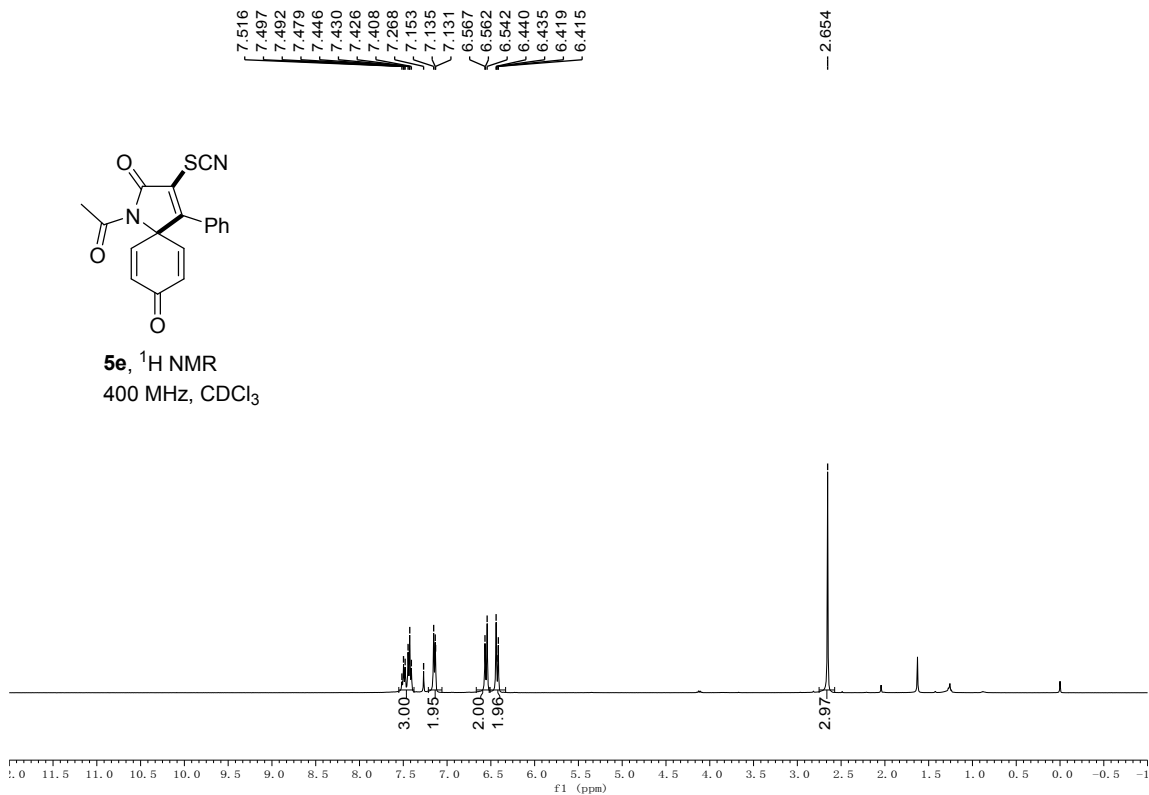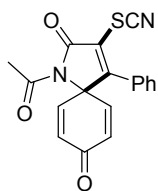

**5e**,  $^{13}\text{C}$  NMR  
101 MHz,  $\text{CDCl}_3$

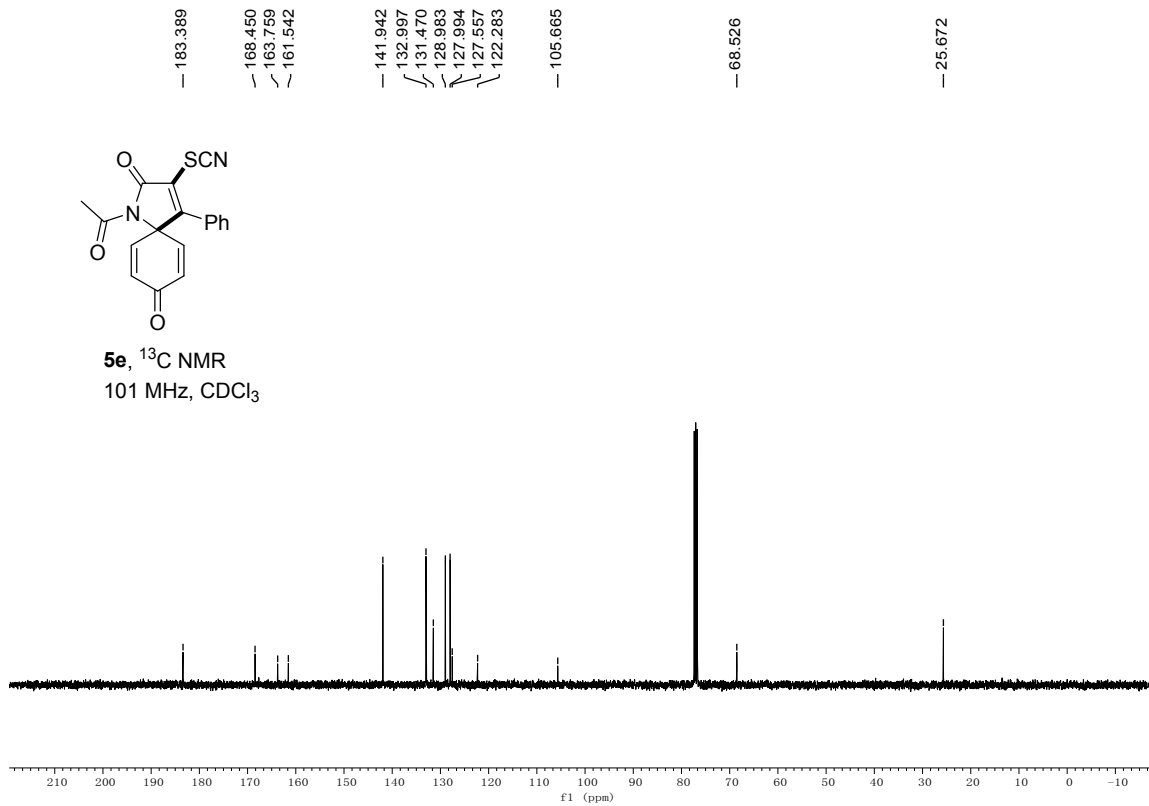

7.437  
7.423  
7.419  
7.415  
7.399  
7.395  
7.384  
7.380  
7.362  
7.284  
7.280  
7.273  
7.267  
7.258  
7.251  
7.242  
7.232  
7.226  
7.184  
7.181  
7.177  
7.169  
7.164  
7.159  
6.354  
6.339  
6.334  
6.328  
6.304  
6.298  
6.293  
6.272  
—4.590

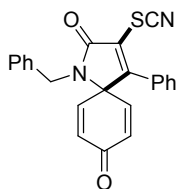

**5f**,  $^1\text{H NMR}$   
400 MHz,  $\text{CDCl}_3$

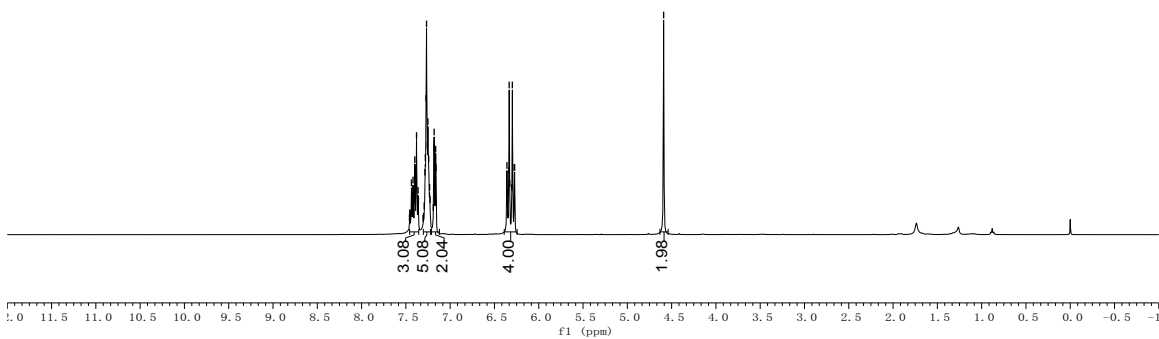

— 183.506  
— 165.159  
— 157.307  
— 143.256  
— 136.548  
— 133.083  
— 131.020  
— 128.988  
— 128.716  
— 128.668  
— 128.221  
— 127.821  
— 122.349  
— 106.260  
— 68.845  
— 45.470

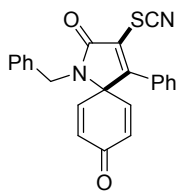

**5f**,  $^{13}\text{C NMR}$   
101 MHz,  $\text{CDCl}_3$

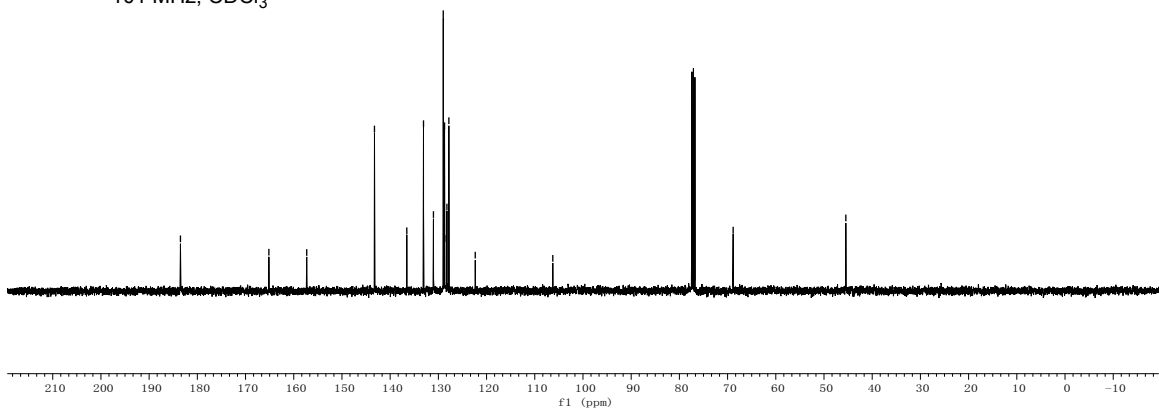

7.505  
7.502  
7.498  
7.491  
7.483  
7.477  
7.469  
7.465  
7.462  
7.450  
7.446  
7.436  
7.431  
7.419  
7.414  
7.410  
7.292  
7.286  
7.282  
7.278  
7.271  
7.266  
7.261  
6.558  
6.554  
6.533  
6.529  
6.507  
6.482  
6.396  
6.382  
6.388

— 2.862

1.770  
1.767

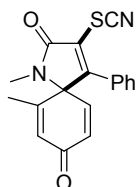

**5g**,  $^1\text{H NMR}$   
400 MHz,  $\text{CDCl}_3$

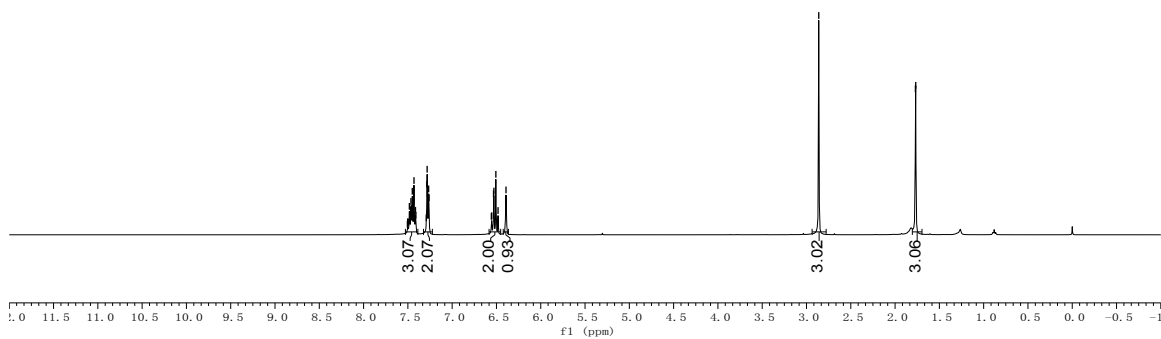

— 184.064

— 165.406

— 157.412

— 151.576

— 143.266

133.447

132.568

131.329

129.257

128.731

127.558

122.335

— 106.349

— 70.504

— 26.146

— 17.711

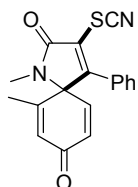

**5g**,  $^{13}\text{C NMR}$   
101 MHz,  $\text{CDCl}_3$

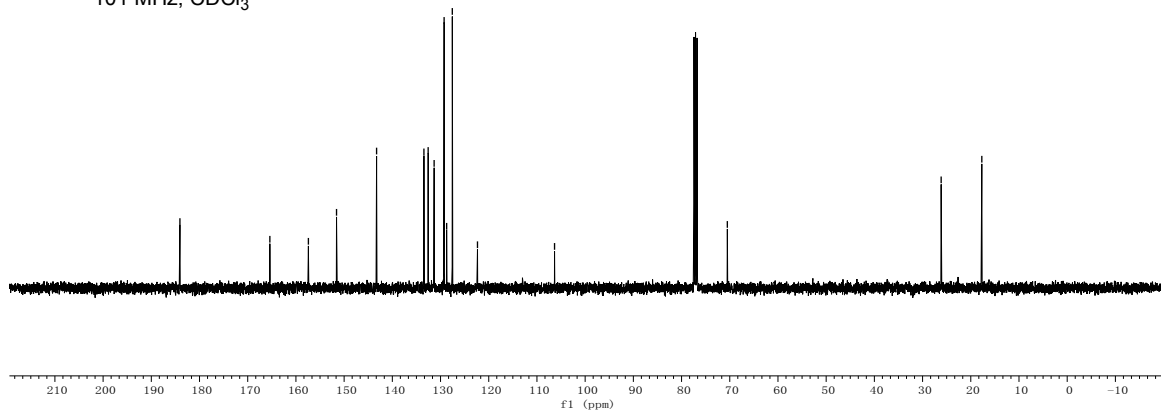

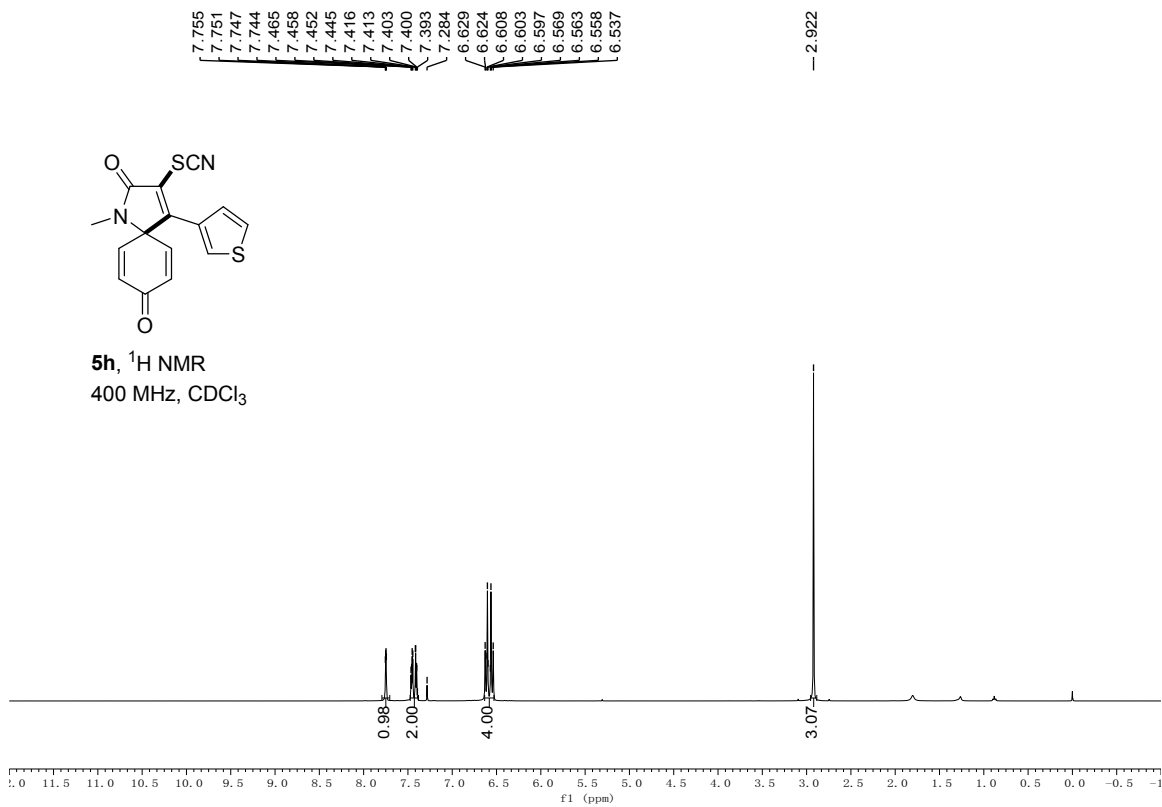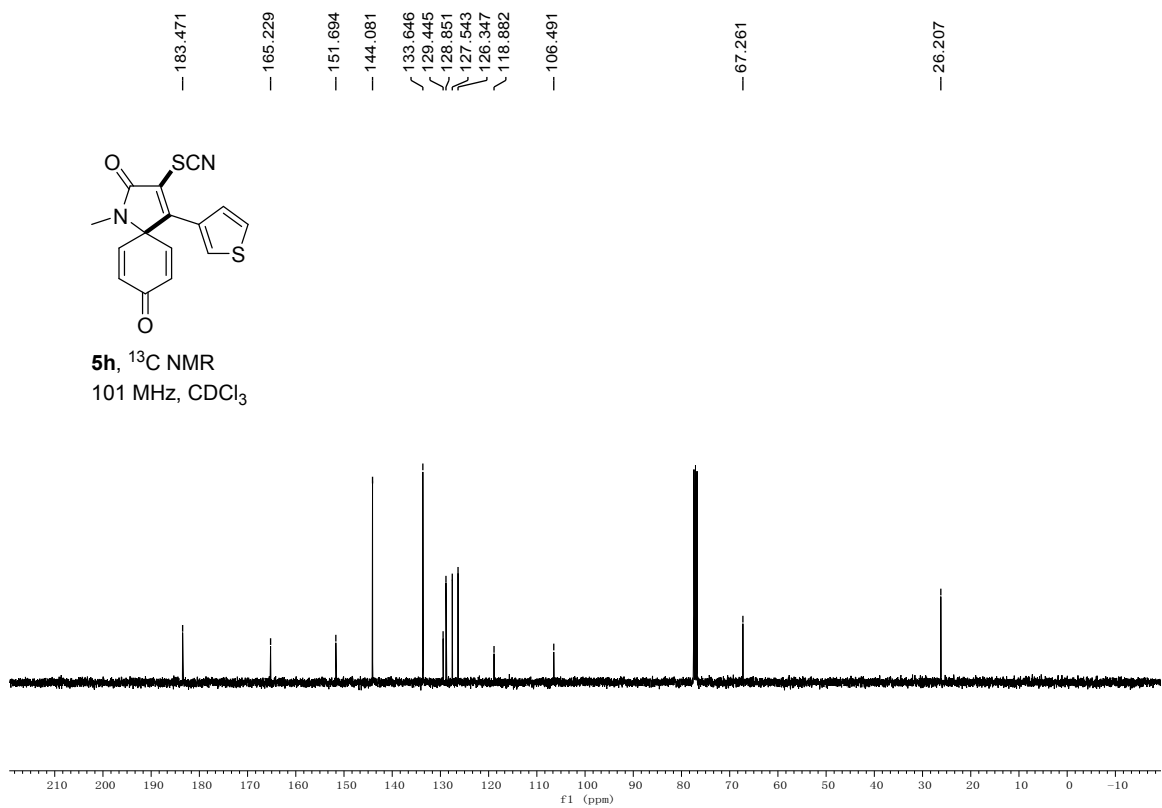



## 5. Reference

- [1] Liu, Y.; Wang, Q.-L.; Zhou, C.-S.; Xiong, B.-Q.; Zhang, P.-L.; Yang, C.-a.; Tang, K.-W. *J. Org. Chem.* **2018**, *83*, 2210-2218.
- [2] Reddy, C. R.; Kolgave, D. H.; Subbarao, M.; Aila, M.; Prajapati, S. K. *Org. Lett.* **2020**, DOI 10.1021/acs.orglett.1020c01588.
- [3] Chen, Y.; Chen, Y.-J.; Guan, Z.; He, Y.-H. *Tetrahedron* **2019**, *75*, 130763.
- [4] Hua, H.-L.; He, Y.-T.; Qiu, Y.-F.; Li, Y.-X.; Song, B.; Gao, P.; Song, X.-R.; Guo, D.-H.; Liu, X.-Y.; Liang, Y.-M. *Chem. Eur. J.* **2015**, *21*, 1468-1473.
- [5] Wang, C. S.; Roisnel, T.; Dixneuf, P. H.; Soulé, J. F. *Adv. Synth. Catal.* **2018**, *361*, 445-450.
- [6] Wang, L. J.; Wang, A. Q.; Xia, Y.; Wu, X. X.; Liu, X. Y.; Liang, Y. M. *Chem. Commun.* **2014**, *50*, 13998-14001.
